# Supplementary material for: Primary osteoarthritis chondrocyte map of chromatin conformation reveals novel candidate effector genes
Source: Ann Rheum Dis. 2024 Mar 13;83(8):1048–59. doi: 10.1136/ard-2023-224945 (PMC11287644; doi:10.1136/ard-2023-224945)
Supplement: Supplementary data [file ard-2023-224945supp012.xlsx]

## Sheet: Sheet1
Supplemental Table 1: Metadata of patients participating in this study
Age	Ancestry
Adult in the 60s	White European
Adult in the 70s	White European
Adult in the 60s	White European
Adult in the 60s	White European
Adult in the 70s	White European
Adult in the 50s	White European
Adult in the 70s	White European
Adult in the 70s	White European
Adult in the 70s	White European
