# Supplementary material for: Primary osteoarthritis chondrocyte map of chromatin conformation reveals novel candidate effector genes
Source: Ann Rheum Dis. 2024 Mar 13;83(8):1048–59. doi: 10.1136/ard-2023-224945 (PMC11287644; doi:10.1136/ard-2023-224945)
Supplement: Supplementary data [file ard-2023-224945supp015.xlsx]

## Sheet: TAD_CTCF_overlay_publication
Supplemental Table 4: TAD domain boundaries and CTCF binding motifs within these boundaries. TAD boundaries are within ± 25kb of the TAD start and end site respectively and were calculated with the HiCFindTAD tool from HiCExplorer for a binsize of 50kb (PMID: 35809047). Predicted CTCF binding site motifs were extracted from the JASPAR 2022 database (PMID: 34850907).
Chromosome	TAD boundary start	TAD boundary end	CTCF start	CTCF end
1	725000	775000	725521	725555
1	725000	775000	725537	725555
1	725000	775000	726027	726060
1	725000	775000	726221	726255
1	725000	775000	726301	726334
1	725000	775000	726316	726334
1	725000	775000	726468	726486
1	725000	775000	726526	726559
1	725000	775000	726531	726549
1	725000	775000	726535	726569
1	725000	775000	726598	726616
1	725000	775000	726615	726649
1	725000	775000	726626	726659
1	725000	775000	726631	726649
1	725000	775000	726756	726790
1	725000	775000	726772	726790
1	725000	775000	726788	726821
1	725000	775000	726798	726831
1	725000	775000	726803	726821
1	725000	775000	727051	727084
1	725000	775000	727051	727085
1	725000	775000	727453	727487
1	725000	775000	727480	727513
1	725000	775000	727523	727556
1	725000	775000	727544	727578
1	725000	775000	727587	727620
1	725000	775000	727596	727630
1	725000	775000	727602	727620
1	725000	775000	727818	727851
1	725000	775000	727833	727851
1	725000	775000	727839	727873
1	725000	775000	727855	727873
1	725000	775000	728075	728108
1	725000	775000	728080	728098
1	725000	775000	728132	728166
1	725000	775000	728133	728166
1	725000	775000	728148	728166
1	725000	775000	728276	728309
1	725000	775000	728309	728343
1	725000	775000	728325	728343
1	725000	775000	728352	728385
1	725000	775000	728378	728412
1	725000	775000	728389	728422
1	725000	775000	728404	728422
1	725000	775000	728742	728776
1	725000	775000	728764	728798
1	725000	775000	728807	728840
1	725000	775000	728816	728850
1	725000	775000	729064	729097
1	725000	775000	729079	729097
1	725000	775000	729312	729346
1	725000	775000	729323	729356
1	725000	775000	729328	729346
1	725000	775000	729338	729356
1	725000	775000	729441	729475
1	725000	775000	729474	729507
1	725000	775000	729484	729517
1	725000	775000	729489	729507
1	725000	775000	729807	729825
1	725000	775000	730326	730360
1	725000	775000	732189	732207
1	725000	775000	733216	733234
1	725000	775000	733735	733769
1	725000	775000	735595	735613
1	725000	775000	736590	736608
1	725000	775000	736622	736640
1	725000	775000	737141	737175
1	725000	775000	739006	739024
1	725000	775000	740038	740056
1	725000	775000	740557	740591
1	725000	775000	741068	741102
1	725000	775000	741397	741431
1	725000	775000	741413	741431
1	725000	775000	741571	741589
1	725000	775000	745099	745132
1	725000	775000	745114	745132
1	725000	775000	745348	745381
1	725000	775000	752398	752431
1	725000	775000	753456	753490
1	725000	775000	753472	753490
1	725000	775000	753619	753637
1	725000	775000	766685	766718
1	725000	775000	766700	766718
1	725000	775000	766971	766989
1	725000	775000	768183	768217
1	725000	775000	768954	768988
1	725000	775000	768970	768988
1	725000	775000	769796	769829
1	725000	775000	770897	770915
1	725000	775000	770928	770961
1	725000	775000	770958	770991
1	725000	775000	771172	771206
1	725000	775000	771188	771206
1	725000	775000	771776	771809
1	725000	775000	772166	772184
1	725000	775000	774881	774899
1	725000	775000	725304	725338
1	725000	775000	725385	725418
1	725000	775000	726039	726073
1	725000	775000	726040	726073
1	725000	775000	726179	726213
1	725000	775000	726476	726509
1	725000	775000	726539	726572
1	725000	775000	726639	726672
1	725000	775000	727022	727056
1	725000	775000	727064	727097
1	725000	775000	727492	727525
1	725000	775000	727503	727537
1	725000	775000	727535	727569
1	725000	775000	727536	727569
1	725000	775000	727600	727633
1	725000	775000	727863	727896
1	725000	775000	728155	728189
1	725000	775000	728156	728189
1	725000	775000	728365	728399
1	725000	775000	728755	728789
1	725000	775000	728756	728789
1	725000	775000	728820	728853
1	725000	775000	728982	729015
1	725000	775000	729077	729110
1	725000	775000	729172	729205
1	725000	775000	729336	729369
1	725000	775000	729497	729530
1	725000	775000	730371	730389
1	725000	775000	730371	730404
1	725000	775000	733780	733798
1	725000	775000	733780	733813
1	725000	775000	737186	737204
1	725000	775000	737186	737219
1	725000	775000	740602	740620
1	725000	775000	740602	740635
1	725000	775000	743528	743562
1	725000	775000	746337	746355
1	725000	775000	746337	746370
1	725000	775000	748664	748698
1	725000	775000	750483	750517
1	725000	775000	750940	750974
1	725000	775000	752737	752755
1	725000	775000	753207	753240
1	725000	775000	757984	758002
1	725000	775000	763375	763409
1	725000	775000	770125	770159
1	725000	775000	770221	770254
1	725000	775000	770935	770968
1	725000	775000	770971	771005
1	725000	775000	774077	774095
1	725000	775000	774077	774110
1	1325000	1375000	1325016	1325049
1	1325000	1375000	1325031	1325049
1	1325000	1375000	1325258	1325291
1	1325000	1375000	1325654	1325688
1	1325000	1375000	1325820	1325854
1	1325000	1375000	1326571	1326605
1	1325000	1375000	1326587	1326605
1	1325000	1375000	1326992	1327026
1	1325000	1375000	1327033	1327066
1	1325000	1375000	1327122	1327155
1	1325000	1375000	1327461	1327494
1	1325000	1375000	1328036	1328069
1	1325000	1375000	1328531	1328564
1	1325000	1375000	1328586	1328620
1	1325000	1375000	1328752	1328785
1	1325000	1375000	1328909	1328927
1	1325000	1375000	1329091	1329124
1	1325000	1375000	1330478	1330511
1	1325000	1375000	1330564	1330598
1	1325000	1375000	1330580	1330598
1	1325000	1375000	1330605	1330638
1	1325000	1375000	1330756	1330789
1	1325000	1375000	1330855	1330888
1	1325000	1375000	1331914	1331947
1	1325000	1375000	1331914	1331948
1	1325000	1375000	1331917	1331950
1	1325000	1375000	1332485	1332518
1	1325000	1375000	1332758	1332791
1	1325000	1375000	1332795	1332828
1	1325000	1375000	1333058	1333091
1	1325000	1375000	1333377	1333411
1	1325000	1375000	1333843	1333876
1	1325000	1375000	1334832	1334866
1	1325000	1375000	1334868	1334902
1	1325000	1375000	1334883	1334916
1	1325000	1375000	1334898	1334916
1	1325000	1375000	1335652	1335686
1	1325000	1375000	1335656	1335689
1	1325000	1375000	1335874	1335908
1	1325000	1375000	1335890	1335908
1	1325000	1375000	1335987	1336021
1	1325000	1375000	1336089	1336123
1	1325000	1375000	1336232	1336266
1	1325000	1375000	1336347	1336380
1	1325000	1375000	1336687	1336720
1	1325000	1375000	1336697	1336730
1	1325000	1375000	1336702	1336720
1	1325000	1375000	1337111	1337144
1	1325000	1375000	1337126	1337144
1	1325000	1375000	1337282	1337316
1	1325000	1375000	1337626	1337660
1	1325000	1375000	1337936	1337969
1	1325000	1375000	1338676	1338709
1	1325000	1375000	1338777	1338810
1	1325000	1375000	1338949	1338983
1	1325000	1375000	1338950	1338983
1	1325000	1375000	1339384	1339417
1	1325000	1375000	1339429	1339463
1	1325000	1375000	1340051	1340084
1	1325000	1375000	1340399	1340433
1	1325000	1375000	1340415	1340433
1	1325000	1375000	1341975	1342009
1	1325000	1375000	1342232	1342266
1	1325000	1375000	1342248	1342266
1	1325000	1375000	1342571	1342605
1	1325000	1375000	1342830	1342864
1	1325000	1375000	1342922	1342956
1	1325000	1375000	1343103	1343137
1	1325000	1375000	1343846	1343864
1	1325000	1375000	1343859	1343892
1	1325000	1375000	1344557	1344591
1	1325000	1375000	1344776	1344810
1	1325000	1375000	1344782	1344800
1	1325000	1375000	1344792	1344810
1	1325000	1375000	1344874	1344908
1	1325000	1375000	1345066	1345100
1	1325000	1375000	1345069	1345103
1	1325000	1375000	1345085	1345103
1	1325000	1375000	1345418	1345451
1	1325000	1375000	1345418	1345452
1	1325000	1375000	1345433	1345451
1	1325000	1375000	1345684	1345718
1	1325000	1375000	1345812	1345845
1	1325000	1375000	1345915	1345949
1	1325000	1375000	1345931	1345949
1	1325000	1375000	1347359	1347393
1	1325000	1375000	1347360	1347393
1	1325000	1375000	1347375	1347393
1	1325000	1375000	1348032	1348065
1	1325000	1375000	1348179	1348212
1	1325000	1375000	1349279	1349312
1	1325000	1375000	1349345	1349378
1	1325000	1375000	1349397	1349430
1	1325000	1375000	1349412	1349430
1	1325000	1375000	1349915	1349949
1	1325000	1375000	1349934	1349968
1	1325000	1375000	1349935	1349968
1	1325000	1375000	1349950	1349968
1	1325000	1375000	1351872	1351906
1	1325000	1375000	1352195	1352228
1	1325000	1375000	1352287	1352320
1	1325000	1375000	1352730	1352748
1	1325000	1375000	1353024	1353058
1	1325000	1375000	1353044	1353077
1	1325000	1375000	1353287	1353321
1	1325000	1375000	1353303	1353321
1	1325000	1375000	1353608	1353642
1	1325000	1375000	1353869	1353887
1	1325000	1375000	1354342	1354376
1	1325000	1375000	1354708	1354741
1	1325000	1375000	1354757	1354775
1	1325000	1375000	1355112	1355145
1	1325000	1375000	1355539	1355573
1	1325000	1375000	1355550	1355583
1	1325000	1375000	1356153	1356186
1	1325000	1375000	1356705	1356738
1	1325000	1375000	1359057	1359091
1	1325000	1375000	1359244	1359277
1	1325000	1375000	1359259	1359293
1	1325000	1375000	1360166	1360199
1	1325000	1375000	1360166	1360200
1	1325000	1375000	1360260	1360294
1	1325000	1375000	1360261	1360294
1	1325000	1375000	1360276	1360294
1	1325000	1375000	1360354	1360387
1	1325000	1375000	1362127	1362160
1	1325000	1375000	1362142	1362160
1	1325000	1375000	1364391	1364424
1	1325000	1375000	1365536	1365569
1	1325000	1375000	1368289	1368323
1	1325000	1375000	1368695	1368729
1	1325000	1375000	1370516	1370549
1	1325000	1375000	1370876	1370909
1	1325000	1375000	1371497	1371531
1	1325000	1375000	1371700	1371733
1	1325000	1375000	1372005	1372039
1	1325000	1375000	1372560	1372594
1	1325000	1375000	1372601	1372634
1	1325000	1375000	1372616	1372634
1	1325000	1375000	1373190	1373208
1	1325000	1375000	1373565	1373598
1	1325000	1375000	1374253	1374287
1	1325000	1375000	1374820	1374853
1	1325000	1375000	1374988	1375021
1	1325000	1375000	1325076	1325094
1	1325000	1375000	1325165	1325198
1	1325000	1375000	1325168	1325186
1	1325000	1375000	1325168	1325202
1	1325000	1375000	1325612	1325630
1	1325000	1375000	1325612	1325646
1	1325000	1375000	1325781	1325815
1	1325000	1375000	1325823	1325857
1	1325000	1375000	1326478	1326511
1	1325000	1375000	1326545	1326563
1	1325000	1375000	1326545	1326578
1	1325000	1375000	1326545	1326579
1	1325000	1375000	1327170	1327203
1	1325000	1375000	1327344	1327362
1	1325000	1375000	1327454	1327487
1	1325000	1375000	1327737	1327755
1	1325000	1375000	1327837	1327870
1	1325000	1375000	1328272	1328306
1	1325000	1375000	1328492	1328526
1	1325000	1375000	1328495	1328528
1	1325000	1375000	1328600	1328633
1	1325000	1375000	1328926	1328960
1	1325000	1375000	1330345	1330378
1	1325000	1375000	1330395	1330428
1	1325000	1375000	1330762	1330795
1	1325000	1375000	1330836	1330870
1	1325000	1375000	1331307	1331340
1	1325000	1375000	1331818	1331851
1	1325000	1375000	1332829	1332863
1	1325000	1375000	1333820	1333854
1	1325000	1375000	1334323	1334356
1	1325000	1375000	1335542	1335575
1	1325000	1375000	1335796	1335830
1	1325000	1375000	1335940	1335973
1	1325000	1375000	1336092	1336125
1	1325000	1375000	1336246	1336264
1	1325000	1375000	1336246	1336280
1	1325000	1375000	1336578	1336596
1	1325000	1375000	1336578	1336612
1	1325000	1375000	1336661	1336695
1	1325000	1375000	1336662	1336695
1	1325000	1375000	1336664	1336698
1	1325000	1375000	1337285	1337319
1	1325000	1375000	1337472	1337490
1	1325000	1375000	1338802	1338835
1	1325000	1375000	1339112	1339145
1	1325000	1375000	1339187	1339220
1	1325000	1375000	1339197	1339231
1	1325000	1375000	1339248	1339281
1	1325000	1375000	1339261	1339295
1	1325000	1375000	1341946	1341980
1	1325000	1375000	1341949	1341983
1	1325000	1375000	1342130	1342164
1	1325000	1375000	1342140	1342173
1	1325000	1375000	1342262	1342295
1	1325000	1375000	1342289	1342307
1	1325000	1375000	1342289	1342323
1	1325000	1375000	1342602	1342635
1	1325000	1375000	1342612	1342630
1	1325000	1375000	1342612	1342645
1	1325000	1375000	1342749	1342767
1	1325000	1375000	1342749	1342782
1	1325000	1375000	1342780	1342814
1	1325000	1375000	1342854	1342887
1	1325000	1375000	1343147	1343181
1	1325000	1375000	1343396	1343429
1	1325000	1375000	1343871	1343905
1	1325000	1375000	1344169	1344187
1	1325000	1375000	1344285	1344318
1	1325000	1375000	1344325	1344343
1	1325000	1375000	1344528	1344562
1	1325000	1375000	1344529	1344562
1	1325000	1375000	1344540	1344574
1	1325000	1375000	1344560	1344593
1	1325000	1375000	1344790	1344823
1	1325000	1375000	1344888	1344921
1	1325000	1375000	1345242	1345260
1	1325000	1375000	1345510	1345543
1	1325000	1375000	1346096	1346129
1	1325000	1375000	1346135	1346168
1	1325000	1375000	1346875	1346908
1	1325000	1375000	1347231	1347265
1	1325000	1375000	1347438	1347472
1	1325000	1375000	1347740	1347758
1	1325000	1375000	1347740	1347773
1	1325000	1375000	1348756	1348790
1	1325000	1375000	1349186	1349219
1	1325000	1375000	1349196	1349214
1	1325000	1375000	1349196	1349229
1	1325000	1375000	1349705	1349723
1	1325000	1375000	1349705	1349739
1	1325000	1375000	1352277	1352311
1	1325000	1375000	1352278	1352311
1	1325000	1375000	1352725	1352758
1	1325000	1375000	1352791	1352824
1	1325000	1375000	1352969	1353002
1	1325000	1375000	1353455	1353489
1	1325000	1375000	1353538	1353572
1	1325000	1375000	1353697	1353730
1	1325000	1375000	1354356	1354389
1	1325000	1375000	1354427	1354460
1	1325000	1375000	1354623	1354657
1	1325000	1375000	1354670	1354704
1	1325000	1375000	1354835	1354853
1	1325000	1375000	1354835	1354869
1	1325000	1375000	1354985	1355018
1	1325000	1375000	1355575	1355609
1	1325000	1375000	1355785	1355818
1	1325000	1375000	1356155	1356173
1	1325000	1375000	1356155	1356189
1	1325000	1375000	1356424	1356457
1	1325000	1375000	1356426	1356460
1	1325000	1375000	1356475	1356509
1	1325000	1375000	1356597	1356630
1	1325000	1375000	1357378	1357396
1	1325000	1375000	1357378	1357412
1	1325000	1375000	1357774	1357807
1	1325000	1375000	1357915	1357949
1	1325000	1375000	1358040	1358073
1	1325000	1375000	1358418	1358451
1	1325000	1375000	1358429	1358462
1	1325000	1375000	1359213	1359231
1	1325000	1375000	1359213	1359246
1	1325000	1375000	1359257	1359290
1	1325000	1375000	1359519	1359552
1	1325000	1375000	1359854	1359887
1	1325000	1375000	1359873	1359891
1	1325000	1375000	1360157	1360191
1	1325000	1375000	1360173	1360207
1	1325000	1375000	1360274	1360292
1	1325000	1375000	1360274	1360307
1	1325000	1375000	1360274	1360308
1	1325000	1375000	1360483	1360516
1	1325000	1375000	1360657	1360691
1	1325000	1375000	1362130	1362163
1	1325000	1375000	1362226	1362244
1	1325000	1375000	1362226	1362259
1	1325000	1375000	1362453	1362471
1	1325000	1375000	1363167	1363201
1	1325000	1375000	1363680	1363698
1	1325000	1375000	1363680	1363713
1	1325000	1375000	1364363	1364396
1	1325000	1375000	1364369	1364402
1	1325000	1375000	1364382	1364400
1	1325000	1375000	1365859	1365893
1	1325000	1375000	1369878	1369896
1	1325000	1375000	1371269	1371302
1	1325000	1375000	1371380	1371398
1	1325000	1375000	1371380	1371414
1	1325000	1375000	1371700	1371718
1	1325000	1375000	1371700	1371734
1	1325000	1375000	1372224	1372242
1	1325000	1375000	1372224	1372257
1	1325000	1375000	1373577	1373610
1	1325000	1375000	1374351	1374384
1	1325000	1375000	1374613	1374646
1	2375000	2425000	2375304	2375337
1	2375000	2425000	2375344	2375378
1	2375000	2425000	2375457	2375475
1	2375000	2425000	2375508	2375542
1	2375000	2425000	2375612	2375645
1	2375000	2425000	2375842	2375876
1	2375000	2425000	2376099	2376132
1	2375000	2425000	2376422	2376440
1	2375000	2425000	2376985	2377018
1	2375000	2425000	2376985	2377019
1	2375000	2425000	2377057	2377090
1	2375000	2425000	2377120	2377153
1	2375000	2425000	2377130	2377163
1	2375000	2425000	2377130	2377164
1	2375000	2425000	2377168	2377201
1	2375000	2425000	2377794	2377828
1	2375000	2425000	2377810	2377828
1	2375000	2425000	2377890	2377924
1	2375000	2425000	2377909	2377927
1	2375000	2425000	2378231	2378265
1	2375000	2425000	2378462	2378495
1	2375000	2425000	2378506	2378540
1	2375000	2425000	2378952	2378986
1	2375000	2425000	2379636	2379669
1	2375000	2425000	2379938	2379972
1	2375000	2425000	2379941	2379974
1	2375000	2425000	2380990	2381023
1	2375000	2425000	2381319	2381337
1	2375000	2425000	2381356	2381390
1	2375000	2425000	2381357	2381390
1	2375000	2425000	2381372	2381390
1	2375000	2425000	2381697	2381715
1	2375000	2425000	2381740	2381758
1	2375000	2425000	2382184	2382218
1	2375000	2425000	2382185	2382218
1	2375000	2425000	2382200	2382218
1	2375000	2425000	2382492	2382526
1	2375000	2425000	2382760	2382793
1	2375000	2425000	2382775	2382793
1	2375000	2425000	2383197	2383230
1	2375000	2425000	2383695	2383728
1	2375000	2425000	2383876	2383910
1	2375000	2425000	2384316	2384349
1	2375000	2425000	2384932	2384965
1	2375000	2425000	2384947	2384965
1	2375000	2425000	2384960	2384993
1	2375000	2425000	2385086	2385119
1	2375000	2425000	2385091	2385109
1	2375000	2425000	2385104	2385122
1	2375000	2425000	2385203	2385237
1	2375000	2425000	2385219	2385237
1	2375000	2425000	2385639	2385672
1	2375000	2425000	2385660	2385694
1	2375000	2425000	2385676	2385694
1	2375000	2425000	2385680	2385713
1	2375000	2425000	2389712	2389746
1	2375000	2425000	2390072	2390105
1	2375000	2425000	2390072	2390106
1	2375000	2425000	2390266	2390299
1	2375000	2425000	2390328	2390361
1	2375000	2425000	2390362	2390395
1	2375000	2425000	2390882	2390900
1	2375000	2425000	2391188	2391222
1	2375000	2425000	2391204	2391222
1	2375000	2425000	2391225	2391259
1	2375000	2425000	2391697	2391730
1	2375000	2425000	2391792	2391825
1	2375000	2425000	2391807	2391825
1	2375000	2425000	2391838	2391871
1	2375000	2425000	2392173	2392207
1	2375000	2425000	2392265	2392298
1	2375000	2425000	2393533	2393566
1	2375000	2425000	2394355	2394389
1	2375000	2425000	2394371	2394389
1	2375000	2425000	2394775	2394793
1	2375000	2425000	2394965	2394998
1	2375000	2425000	2399785	2399803
1	2375000	2425000	2399841	2399874
1	2375000	2425000	2400064	2400097
1	2375000	2425000	2401163	2401196
1	2375000	2425000	2401178	2401196
1	2375000	2425000	2401794	2401828
1	2375000	2425000	2402130	2402163
1	2375000	2425000	2402149	2402183
1	2375000	2425000	2402178	2402212
1	2375000	2425000	2402538	2402572
1	2375000	2425000	2402604	2402638
1	2375000	2425000	2402639	2402672
1	2375000	2425000	2403362	2403395
1	2375000	2425000	2403485	2403518
1	2375000	2425000	2403814	2403847
1	2375000	2425000	2404974	2405008
1	2375000	2425000	2404990	2405008
1	2375000	2425000	2405796	2405829
1	2375000	2425000	2405815	2405849
1	2375000	2425000	2406432	2406466
1	2375000	2425000	2406436	2406469
1	2375000	2425000	2406882	2406915
1	2375000	2425000	2406897	2406915
1	2375000	2425000	2407310	2407343
1	2375000	2425000	2407763	2407796
1	2375000	2425000	2408377	2408410
1	2375000	2425000	2408649	2408682
1	2375000	2425000	2408698	2408731
1	2375000	2425000	2408706	2408724
1	2375000	2425000	2408730	2408748
1	2375000	2425000	2408894	2408927
1	2375000	2425000	2409388	2409421
1	2375000	2425000	2409428	2409461
1	2375000	2425000	2409507	2409540
1	2375000	2425000	2411923	2411957
1	2375000	2425000	2412040	2412074
1	2375000	2425000	2412059	2412077
1	2375000	2425000	2412469	2412487
1	2375000	2425000	2412618	2412651
1	2375000	2425000	2412624	2412657
1	2375000	2425000	2413193	2413226
1	2375000	2425000	2413193	2413227
1	2375000	2425000	2413257	2413291
1	2375000	2425000	2413402	2413436
1	2375000	2425000	2413421	2413439
1	2375000	2425000	2413460	2413493
1	2375000	2425000	2414043	2414076
1	2375000	2425000	2414537	2414571
1	2375000	2425000	2414538	2414571
1	2375000	2425000	2414553	2414571
1	2375000	2425000	2414699	2414733
1	2375000	2425000	2414854	2414888
1	2375000	2425000	2415304	2415338
1	2375000	2425000	2415801	2415835
1	2375000	2425000	2415898	2415931
1	2375000	2425000	2416059	2416093
1	2375000	2425000	2416075	2416093
1	2375000	2425000	2416085	2416118
1	2375000	2425000	2416398	2416416
1	2375000	2425000	2416430	2416464
1	2375000	2425000	2416543	2416576
1	2375000	2425000	2416558	2416576
1	2375000	2425000	2417068	2417101
1	2375000	2425000	2417640	2417673
1	2375000	2425000	2417643	2417677
1	2375000	2425000	2418094	2418128
1	2375000	2425000	2418437	2418470
1	2375000	2425000	2418440	2418473
1	2375000	2425000	2422174	2422207
1	2375000	2425000	2422189	2422207
1	2375000	2425000	2423684	2423702
1	2375000	2425000	2376440	2376473
1	2375000	2425000	2376712	2376746
1	2375000	2425000	2377102	2377135
1	2375000	2425000	2377674	2377707
1	2375000	2425000	2377904	2377938
1	2375000	2425000	2377975	2378009
1	2375000	2425000	2378016	2378049
1	2375000	2425000	2378219	2378252
1	2375000	2425000	2378530	2378564
1	2375000	2425000	2379561	2379595
1	2375000	2425000	2379639	2379672
1	2375000	2425000	2380145	2380178
1	2375000	2425000	2381915	2381933
1	2375000	2425000	2381915	2381948
1	2375000	2425000	2381915	2381949
1	2375000	2425000	2382188	2382221
1	2375000	2425000	2382661	2382694
1	2375000	2425000	2385131	2385164
1	2375000	2425000	2385217	2385251
1	2375000	2425000	2385964	2385998
1	2375000	2425000	2386453	2386486
1	2375000	2425000	2386883	2386901
1	2375000	2425000	2386883	2386916
1	2375000	2425000	2387079	2387112
1	2375000	2425000	2387098	2387131
1	2375000	2425000	2388686	2388720
1	2375000	2425000	2390487	2390505
1	2375000	2425000	2390487	2390521
1	2375000	2425000	2390514	2390547
1	2375000	2425000	2391216	2391250
1	2375000	2425000	2391525	2391559
1	2375000	2425000	2391710	2391743
1	2375000	2425000	2391782	2391816
1	2375000	2425000	2391792	2391810
1	2375000	2425000	2391902	2391935
1	2375000	2425000	2392041	2392074
1	2375000	2425000	2392278	2392312
1	2375000	2425000	2394395	2394428
1	2375000	2425000	2394409	2394443
1	2375000	2425000	2395593	2395627
1	2375000	2425000	2396220	2396253
1	2375000	2425000	2396831	2396849
1	2375000	2425000	2398468	2398486
1	2375000	2425000	2400211	2400245
1	2375000	2425000	2401160	2401194
1	2375000	2425000	2401441	2401475
1	2375000	2425000	2401785	2401803
1	2375000	2425000	2401785	2401819
1	2375000	2425000	2402096	2402129
1	2375000	2425000	2402468	2402501
1	2375000	2425000	2404317	2404335
1	2375000	2425000	2404787	2404805
1	2375000	2425000	2405261	2405294
1	2375000	2425000	2405567	2405600
1	2375000	2425000	2406063	2406096
1	2375000	2425000	2406413	2406446
1	2375000	2425000	2406711	2406745
1	2375000	2425000	2406789	2406823
1	2375000	2425000	2406998	2407032
1	2375000	2425000	2407320	2407353
1	2375000	2425000	2407735	2407768
1	2375000	2425000	2408155	2408188
1	2375000	2425000	2408572	2408590
1	2375000	2425000	2408572	2408606
1	2375000	2425000	2408640	2408673
1	2375000	2425000	2408931	2408949
1	2375000	2425000	2408931	2408965
1	2375000	2425000	2408986	2409019
1	2375000	2425000	2409110	2409128
1	2375000	2425000	2409293	2409311
1	2375000	2425000	2409293	2409326
1	2375000	2425000	2409513	2409547
1	2375000	2425000	2409516	2409534
1	2375000	2425000	2409516	2409550
1	2375000	2425000	2410185	2410218
1	2375000	2425000	2410294	2410327
1	2375000	2425000	2411122	2411155
1	2375000	2425000	2412079	2412112
1	2375000	2425000	2412191	2412225
1	2375000	2425000	2412284	2412318
1	2375000	2425000	2412406	2412440
1	2375000	2425000	2412901	2412934
1	2375000	2425000	2413144	2413178
1	2375000	2425000	2413195	2413229
1	2375000	2425000	2413196	2413214
1	2375000	2425000	2413196	2413229
1	2375000	2425000	2413196	2413230
1	2375000	2425000	2413206	2413224
1	2375000	2425000	2413317	2413350
1	2375000	2425000	2413441	2413474
1	2375000	2425000	2413714	2413747
1	2375000	2425000	2413768	2413786
1	2375000	2425000	2413768	2413802
1	2375000	2425000	2414241	2414274
1	2375000	2425000	2414506	2414539
1	2375000	2425000	2414868	2414886
1	2375000	2425000	2414868	2414901
1	2375000	2425000	2415585	2415603
1	2375000	2425000	2415585	2415618
1	2375000	2425000	2415651	2415669
1	2375000	2425000	2415733	2415766
1	2375000	2425000	2416094	2416128
1	2375000	2425000	2416095	2416128
1	2375000	2425000	2416097	2416115
1	2375000	2425000	2416097	2416131
1	2375000	2425000	2416179	2416212
1	2375000	2425000	2416228	2416261
1	2375000	2425000	2416496	2416529
1	2375000	2425000	2416646	2416679
1	2375000	2425000	2416686	2416719
1	2375000	2425000	2417861	2417894
1	2375000	2425000	2418065	2418099
1	2375000	2425000	2418393	2418426
1	2375000	2425000	2418490	2418524
1	2375000	2425000	2419095	2419128
1	2375000	2425000	2419899	2419917
1	2375000	2425000	2419899	2419933
1	2375000	2425000	2420003	2420021
1	2375000	2425000	2420003	2420037
1	2375000	2425000	2420356	2420390
1	2375000	2425000	2420700	2420734
1	2375000	2425000	2424385	2424419
1	2625000	2687500	2628573	2628607
1	2625000	2687500	2628701	2628719
1	2625000	2687500	2628852	2628885
1	2625000	2687500	2628867	2628885
1	2625000	2687500	2629070	2629103
1	2625000	2687500	2629168	2629202
1	2625000	2687500	2629283	2629317
1	2625000	2687500	2629299	2629317
1	2625000	2687500	2629333	2629366
1	2625000	2687500	2629522	2629555
1	2625000	2687500	2631302	2631335
1	2625000	2687500	2631892	2631926
1	2625000	2687500	2632775	2632809
1	2625000	2687500	2633297	2633330
1	2625000	2687500	2633300	2633333
1	2625000	2687500	2633300	2633334
1	2625000	2687500	2633423	2633441
1	2625000	2687500	2633621	2633654
1	2625000	2687500	2635473	2635506
1	2625000	2687500	2635773	2635807
1	2625000	2687500	2635902	2635936
1	2625000	2687500	2636016	2636050
1	2625000	2687500	2637477	2637511
1	2625000	2687500	2638543	2638576
1	2625000	2687500	2638643	2638677
1	2625000	2687500	2639005	2639038
1	2625000	2687500	2639020	2639038
1	2625000	2687500	2639409	2639427
1	2625000	2687500	2639917	2639951
1	2625000	2687500	2639918	2639951
1	2625000	2687500	2639933	2639951
1	2625000	2687500	2640137	2640155
1	2625000	2687500	2640815	2640849
1	2625000	2687500	2641426	2641460
1	2625000	2687500	2641442	2641460
1	2625000	2687500	2641558	2641591
1	2625000	2687500	2641944	2641977
1	2625000	2687500	2641982	2642016
1	2625000	2687500	2642640	2642674
1	2625000	2687500	2642727	2642760
1	2625000	2687500	2642742	2642760
1	2625000	2687500	2642861	2642894
1	2625000	2687500	2642963	2642996
1	2625000	2687500	2643189	2643223
1	2625000	2687500	2643192	2643226
1	2625000	2687500	2643194	2643227
1	2625000	2687500	2643208	2643226
1	2625000	2687500	2643326	2643360
1	2625000	2687500	2643327	2643360
1	2625000	2687500	2643812	2643846
1	2625000	2687500	2644106	2644124
1	2625000	2687500	2644271	2644305
1	2625000	2687500	2644287	2644305
1	2625000	2687500	2644686	2644720
1	2625000	2687500	2644871	2644889
1	2625000	2687500	2645063	2645097
1	2625000	2687500	2645296	2645329
1	2625000	2687500	2645311	2645329
1	2625000	2687500	2645379	2645413
1	2625000	2687500	2645423	2645456
1	2625000	2687500	2645962	2645980
1	2625000	2687500	2647539	2647572
1	2625000	2687500	2647554	2647572
1	2625000	2687500	2648272	2648306
1	2625000	2687500	2649025	2649058
1	2625000	2687500	2649040	2649058
1	2625000	2687500	2649066	2649099
1	2625000	2687500	2650646	2650679
1	2625000	2687500	2650786	2650819
1	2625000	2687500	2651704	2651738
1	2625000	2687500	2653430	2653463
1	2625000	2687500	2653712	2653745
1	2625000	2687500	2653872	2653905
1	2625000	2687500	2653952	2653985
1	2625000	2687500	2656438	2656471
1	2625000	2687500	2656559	2656592
1	2625000	2687500	2656840	2656873
1	2625000	2687500	2656961	2656994
1	2625000	2687500	2658006	2658039
1	2625000	2687500	2658118	2658136
1	2625000	2687500	2658206	2658239
1	2625000	2687500	2658768	2658801
1	2625000	2687500	2659088	2659121
1	2625000	2687500	2659370	2659403
1	2625000	2687500	2660051	2660084
1	2625000	2687500	2660413	2660446
1	2625000	2687500	2660453	2660486
1	2625000	2687500	2660525	2660543
1	2625000	2687500	2660613	2660646
1	2625000	2687500	2660935	2660968
1	2625000	2687500	2661616	2661649
1	2625000	2687500	2661737	2661770
1	2625000	2687500	2662018	2662051
1	2625000	2687500	2662139	2662172
1	2625000	2687500	2663384	2663417
1	2625000	2687500	2663704	2663737
1	2625000	2687500	2663986	2664019
1	2625000	2687500	2664667	2664700
1	2625000	2687500	2665029	2665062
1	2625000	2687500	2665069	2665102
1	2625000	2687500	2665141	2665159
1	2625000	2687500	2665229	2665262
1	2625000	2687500	2665551	2665584
1	2625000	2687500	2666232	2666265
1	2625000	2687500	2666634	2666667
1	2625000	2687500	2666755	2666788
1	2625000	2687500	2668000	2668033
1	2625000	2687500	2668320	2668353
1	2625000	2687500	2668602	2668635
1	2625000	2687500	2669283	2669316
1	2625000	2687500	2669645	2669678
1	2625000	2687500	2669685	2669718
1	2625000	2687500	2669757	2669775
1	2625000	2687500	2669845	2669878
1	2625000	2687500	2670167	2670200
1	2625000	2687500	2670848	2670881
1	2625000	2687500	2671250	2671283
1	2625000	2687500	2671371	2671404
1	2625000	2687500	2672416	2672449
1	2625000	2687500	2672528	2672546
1	2625000	2687500	2672616	2672649
1	2625000	2687500	2673178	2673211
1	2625000	2687500	2673498	2673531
1	2625000	2687500	2673780	2673813
1	2625000	2687500	2674461	2674494
1	2625000	2687500	2674823	2674856
1	2625000	2687500	2674863	2674896
1	2625000	2687500	2674935	2674953
1	2625000	2687500	2675023	2675056
1	2625000	2687500	2675504	2675537
1	2625000	2687500	2675906	2675939
1	2625000	2687500	2676027	2676060
1	2625000	2687500	2677072	2677105
1	2625000	2687500	2677184	2677202
1	2625000	2687500	2677272	2677305
1	2625000	2687500	2677834	2677867
1	2625000	2687500	2678035	2678068
1	2625000	2687500	2678075	2678108
1	2625000	2687500	2678147	2678165
1	2625000	2687500	2678235	2678268
1	2625000	2687500	2678557	2678590
1	2625000	2687500	2679238	2679271
1	2625000	2687500	2679640	2679673
1	2625000	2687500	2679761	2679794
1	2625000	2687500	2680766	2680799
1	2625000	2687500	2680806	2680839
1	2625000	2687500	2680918	2680936
1	2625000	2687500	2681006	2681039
1	2625000	2687500	2681887	2681920
1	2625000	2687500	2682251	2682284
1	2625000	2687500	2682363	2682381
1	2625000	2687500	2682451	2682484
1	2625000	2687500	2683013	2683046
1	2625000	2687500	2683133	2683166
1	2625000	2687500	2683253	2683286
1	2625000	2687500	2683333	2683366
1	2625000	2687500	2683414	2683447
1	2625000	2687500	2683535	2683568
1	2625000	2687500	2683655	2683688
1	2625000	2687500	2683670	2683688
1	2625000	2687500	2684218	2684251
1	2625000	2687500	2684338	2684371
1	2625000	2687500	2684418	2684451
1	2625000	2687500	2684819	2684853
1	2625000	2687500	2685301	2685334
1	2625000	2687500	2685381	2685414
1	2625000	2687500	2685438	2685471
1	2625000	2687500	2685438	2685472
1	2625000	2687500	2687428	2687461
1	2625000	2687500	2625988	2626006
1	2625000	2687500	2625988	2626021
1	2625000	2687500	2628937	2628970
1	2625000	2687500	2629125	2629143
1	2625000	2687500	2629125	2629158
1	2625000	2687500	2629173	2629207
1	2625000	2687500	2629183	2629216
1	2625000	2687500	2629229	2629263
1	2625000	2687500	2629476	2629510
1	2625000	2687500	2630106	2630140
1	2625000	2687500	2630109	2630142
1	2625000	2687500	2630589	2630622
1	2625000	2687500	2631377	2631410
1	2625000	2687500	2631694	2631712
1	2625000	2687500	2631959	2631977
1	2625000	2687500	2632262	2632295
1	2625000	2687500	2632608	2632642
1	2625000	2687500	2632609	2632642
1	2625000	2687500	2632628	2632661
1	2625000	2687500	2633049	2633083
1	2625000	2687500	2633243	2633276
1	2625000	2687500	2633962	2633996
1	2625000	2687500	2634419	2634437
1	2625000	2687500	2635757	2635790
1	2625000	2687500	2635819	2635852
1	2625000	2687500	2636454	2636487
1	2625000	2687500	2636768	2636801
1	2625000	2687500	2636778	2636811
1	2625000	2687500	2639018	2639051
1	2625000	2687500	2639257	2639275
1	2625000	2687500	2639257	2639290
1	2625000	2687500	2639257	2639291
1	2625000	2687500	2639431	2639449
1	2625000	2687500	2639931	2639949
1	2625000	2687500	2640488	2640521
1	2625000	2687500	2641440	2641458
1	2625000	2687500	2641704	2641722
1	2625000	2687500	2641773	2641806
1	2625000	2687500	2642233	2642251
1	2625000	2687500	2642233	2642267
1	2625000	2687500	2642421	2642454
1	2625000	2687500	2642740	2642758
1	2625000	2687500	2642740	2642774
1	2625000	2687500	2642884	2642917
1	2625000	2687500	2642894	2642927
1	2625000	2687500	2643118	2643152
1	2625000	2687500	2643203	2643221
1	2625000	2687500	2643203	2643236
1	2625000	2687500	2643337	2643355
1	2625000	2687500	2643337	2643371
1	2625000	2687500	2643340	2643358
1	2625000	2687500	2643396	2643430
1	2625000	2687500	2643442	2643475
1	2625000	2687500	2643601	2643619
1	2625000	2687500	2643666	2643700
1	2625000	2687500	2643905	2643923
1	2625000	2687500	2643905	2643938
1	2625000	2687500	2643957	2643990
1	2625000	2687500	2644274	2644308
1	2625000	2687500	2644729	2644762
1	2625000	2687500	2644790	2644824
1	2625000	2687500	2644954	2644972
1	2625000	2687500	2644954	2644987
1	2625000	2687500	2649079	2649097
1	2625000	2687500	2651593	2651611
1	2625000	2687500	2651799	2651817
1	2625000	2687500	2652119	2652137
1	2625000	2687500	2652200	2652233
1	2625000	2687500	2652479	2652512
1	2625000	2687500	2652516	2652549
1	2625000	2687500	2652761	2652779
1	2625000	2687500	2652761	2652794
1	2625000	2687500	2652841	2652874
1	2625000	2687500	2652852	2652886
1	2625000	2687500	2653121	2653154
1	2625000	2687500	2653282	2653300
1	2625000	2687500	2653443	2653461
1	2625000	2687500	2653443	2653476
1	2625000	2687500	2653494	2653528
1	2625000	2687500	2653684	2653717
1	2625000	2687500	2653695	2653729
1	2625000	2687500	2653855	2653889
1	2625000	2687500	2653924	2653957
1	2625000	2687500	2653935	2653969
1	2625000	2687500	2654285	2654303
1	2625000	2687500	2654366	2654384
1	2625000	2687500	2654487	2654520
1	2625000	2687500	2654538	2654572
1	2625000	2687500	2655048	2655081
1	2625000	2687500	2655125	2655143
1	2625000	2687500	2655128	2655161
1	2625000	2687500	2655328	2655361
1	2625000	2687500	2655405	2655423
1	2625000	2687500	2655408	2655441
1	2625000	2687500	2655608	2655641
1	2625000	2687500	2655689	2655707
1	2625000	2687500	2655689	2655722
1	2625000	2687500	2655780	2655814
1	2625000	2687500	2656049	2656082
1	2625000	2687500	2656410	2656443
1	2625000	2687500	2656451	2656484
1	2625000	2687500	2656451	2656485
1	2625000	2687500	2656502	2656536
1	2625000	2687500	2656890	2656908
1	2625000	2687500	2656890	2656923
1	2625000	2687500	2657655	2657688
1	2625000	2687500	2657897	2657915
1	2625000	2687500	2657897	2657930
1	2625000	2687500	2658178	2658211
1	2625000	2687500	2658660	2658678
1	2625000	2687500	2658700	2658734
1	2625000	2687500	2658980	2659013
1	2625000	2687500	2659017	2659035
1	2625000	2687500	2659903	2659936
1	2625000	2687500	2660063	2660096
1	2625000	2687500	2660143	2660161
1	2625000	2687500	2660143	2660176
1	2625000	2687500	2660143	2660177
1	2625000	2687500	2660154	2660188
1	2625000	2687500	2660305	2660323
1	2625000	2687500	2660305	2660338
1	2625000	2687500	2660596	2660630
1	2625000	2687500	2660907	2660940
1	2625000	2687500	2661588	2661621
1	2625000	2687500	2661629	2661662
1	2625000	2687500	2661629	2661663
1	2625000	2687500	2661680	2661714
1	2625000	2687500	2662068	2662086
1	2625000	2687500	2662068	2662101
1	2625000	2687500	2663276	2663294
1	2625000	2687500	2663316	2663350
1	2625000	2687500	2663596	2663629
1	2625000	2687500	2663633	2663651
1	2625000	2687500	2664519	2664552
1	2625000	2687500	2664679	2664712
1	2625000	2687500	2664921	2664939
1	2625000	2687500	2664921	2664954
1	2625000	2687500	2665212	2665246
1	2625000	2687500	2665523	2665556
1	2625000	2687500	2666204	2666237
1	2625000	2687500	2666245	2666278
1	2625000	2687500	2666245	2666279
1	2625000	2687500	2666296	2666330
1	2625000	2687500	2666684	2666702
1	2625000	2687500	2666684	2666717
1	2625000	2687500	2667892	2667910
1	2625000	2687500	2667932	2667966
1	2625000	2687500	2668212	2668245
1	2625000	2687500	2668249	2668267
1	2625000	2687500	2669135	2669168
1	2625000	2687500	2669295	2669328
1	2625000	2687500	2669537	2669555
1	2625000	2687500	2669537	2669570
1	2625000	2687500	2669828	2669862
1	2625000	2687500	2670139	2670172
1	2625000	2687500	2670820	2670853
1	2625000	2687500	2670861	2670894
1	2625000	2687500	2670861	2670895
1	2625000	2687500	2670912	2670946
1	2625000	2687500	2671300	2671318
1	2625000	2687500	2671300	2671333
1	2625000	2687500	2672065	2672098
1	2625000	2687500	2672307	2672325
1	2625000	2687500	2672307	2672340
1	2625000	2687500	2672588	2672621
1	2625000	2687500	2673070	2673088
1	2625000	2687500	2673110	2673144
1	2625000	2687500	2673390	2673423
1	2625000	2687500	2673427	2673445
1	2625000	2687500	2674313	2674346
1	2625000	2687500	2674473	2674506
1	2625000	2687500	2674715	2674733
1	2625000	2687500	2674715	2674748
1	2625000	2687500	2675006	2675040
1	2625000	2687500	2675517	2675550
1	2625000	2687500	2675517	2675551
1	2625000	2687500	2675568	2675602
1	2625000	2687500	2675956	2675974
1	2625000	2687500	2675956	2675989
1	2625000	2687500	2676721	2676754
1	2625000	2687500	2676963	2676981
1	2625000	2687500	2676963	2676996
1	2625000	2687500	2677244	2677277
1	2625000	2687500	2677726	2677744
1	2625000	2687500	2677766	2677800
1	2625000	2687500	2677927	2677945
1	2625000	2687500	2677927	2677960
1	2625000	2687500	2678218	2678252
1	2625000	2687500	2678529	2678562
1	2625000	2687500	2679210	2679243
1	2625000	2687500	2679251	2679284
1	2625000	2687500	2679251	2679285
1	2625000	2687500	2679302	2679336
1	2625000	2687500	2679690	2679708
1	2625000	2687500	2679690	2679723
1	2625000	2687500	2680455	2680488
1	2625000	2687500	2680697	2680715
1	2625000	2687500	2680697	2680730
1	2625000	2687500	2680978	2681011
1	2625000	2687500	2681460	2681478
1	2625000	2687500	2681500	2681534
1	2625000	2687500	2681779	2681812
1	2625000	2687500	2681816	2681834
1	2625000	2687500	2682142	2682160
1	2625000	2687500	2682142	2682175
1	2625000	2687500	2682423	2682456
1	2625000	2687500	2682905	2682923
1	2625000	2687500	2682945	2682979
1	2625000	2687500	2683225	2683258
1	2625000	2687500	2683346	2683364
1	2625000	2687500	2683507	2683540
1	2625000	2687500	2683518	2683552
1	2625000	2687500	2683668	2683686
1	2625000	2687500	2683668	2683701
1	2625000	2687500	2683919	2683953
1	2625000	2687500	2683989	2684007
1	2625000	2687500	2684310	2684343
1	2625000	2687500	2684431	2684449
1	2625000	2687500	2684431	2684464
1	2625000	2687500	2684482	2684516
1	2625000	2687500	2684791	2684824
1	2625000	2687500	2685073	2685091
1	2625000	2687500	2685273	2685291
1	2625000	2687500	2685273	2685306
1	2625000	2687500	2685713	2685746
1	2625000	2687500	2685874	2685892
1	2625000	2687500	2686035	2686068
1	2625000	2687500	2686355	2686388
1	2625000	2687500	2686677	2686710
1	2625000	2687500	2687239	2687272
1	2625000	2687500	2687400	2687433
1	2625000	2687500	2687411	2687445
1	3425000	3475000	3425726	3425759
1	3425000	3475000	3426341	3426375
1	3425000	3475000	3427460	3427493
1	3425000	3475000	3427475	3427493
1	3425000	3475000	3428406	3428440
1	3425000	3475000	3429087	3429105
1	3425000	3475000	3429427	3429460
1	3425000	3475000	3429550	3429568
1	3425000	3475000	3429567	3429601
1	3425000	3475000	3429583	3429601
1	3425000	3475000	3429940	3429973
1	3425000	3475000	3429955	3429973
1	3425000	3475000	3430396	3430429
1	3425000	3475000	3431419	3431452
1	3425000	3475000	3431434	3431452
1	3425000	3475000	3433083	3433117
1	3425000	3475000	3433086	3433120
1	3425000	3475000	3433099	3433117
1	3425000	3475000	3433358	3433392
1	3425000	3475000	3434884	3434917
1	3425000	3475000	3434887	3434920
1	3425000	3475000	3434913	3434946
1	3425000	3475000	3435708	3435741
1	3425000	3475000	3436704	3436738
1	3425000	3475000	3436720	3436738
1	3425000	3475000	3436890	3436924
1	3425000	3475000	3436956	3436989
1	3425000	3475000	3437556	3437590
1	3425000	3475000	3437572	3437590
1	3425000	3475000	3438905	3438923
1	3425000	3475000	3439588	3439621
1	3425000	3475000	3439676	3439710
1	3425000	3475000	3440473	3440507
1	3425000	3475000	3440474	3440507
1	3425000	3475000	3440489	3440507
1	3425000	3475000	3440960	3440994
1	3425000	3475000	3440998	3441031
1	3425000	3475000	3441068	3441101
1	3425000	3475000	3441081	3441114
1	3425000	3475000	3442716	3442749
1	3425000	3475000	3442730	3442764
1	3425000	3475000	3442746	3442764
1	3425000	3475000	3442841	3442874
1	3425000	3475000	3444095	3444129
1	3425000	3475000	3447322	3447355
1	3425000	3475000	3452153	3452171
1	3425000	3475000	3452874	3452908
1	3425000	3475000	3453276	3453309
1	3425000	3475000	3453291	3453309
1	3425000	3475000	3453315	3453349
1	3425000	3475000	3453342	3453376
1	3425000	3475000	3453358	3453376
1	3425000	3475000	3453362	3453396
1	3425000	3475000	3454023	3454057
1	3425000	3475000	3454039	3454057
1	3425000	3475000	3454284	3454317
1	3425000	3475000	3454299	3454317
1	3425000	3475000	3454380	3454414
1	3425000	3475000	3454381	3454414
1	3425000	3475000	3454396	3454414
1	3425000	3475000	3454433	3454451
1	3425000	3475000	3454880	3454898
1	3425000	3475000	3455915	3455948
1	3425000	3475000	3455927	3455945
1	3425000	3475000	3456095	3456129
1	3425000	3475000	3456290	3456324
1	3425000	3475000	3456489	3456522
1	3425000	3475000	3456747	3456781
1	3425000	3475000	3456871	3456904
1	3425000	3475000	3456906	3456939
1	3425000	3475000	3456906	3456940
1	3425000	3475000	3457297	3457330
1	3425000	3475000	3457715	3457749
1	3425000	3475000	3457731	3457749
1	3425000	3475000	3458446	3458464
1	3425000	3475000	3459453	3459471
1	3425000	3475000	3460282	3460315
1	3425000	3475000	3461732	3461765
1	3425000	3475000	3462527	3462560
1	3425000	3475000	3462527	3462561
1	3425000	3475000	3462729	3462747
1	3425000	3475000	3462742	3462776
1	3425000	3475000	3463416	3463449
1	3425000	3475000	3464029	3464062
1	3425000	3475000	3464060	3464093
1	3425000	3475000	3464160	3464194
1	3425000	3475000	3464173	3464191
1	3425000	3475000	3464505	3464538
1	3425000	3475000	3464520	3464538
1	3425000	3475000	3465423	3465457
1	3425000	3475000	3465518	3465552
1	3425000	3475000	3465708	3465741
1	3425000	3475000	3465783	3465817
1	3425000	3475000	3466814	3466847
1	3425000	3475000	3466829	3466847
1	3425000	3475000	3466860	3466894
1	3425000	3475000	3466876	3466894
1	3425000	3475000	3467247	3467280
1	3425000	3475000	3467396	3467429
1	3425000	3475000	3467432	3467465
1	3425000	3475000	3467575	3467608
1	3425000	3475000	3467623	3467656
1	3425000	3475000	3467638	3467656
1	3425000	3475000	3467749	3467782
1	3425000	3475000	3467764	3467782
1	3425000	3475000	3468300	3468333
1	3425000	3475000	3468315	3468333
1	3425000	3475000	3468388	3468422
1	3425000	3475000	3468472	3468506
1	3425000	3475000	3468635	3468669
1	3425000	3475000	3468638	3468672
1	3425000	3475000	3468646	3468679
1	3425000	3475000	3468793	3468811
1	3425000	3475000	3468854	3468888
1	3425000	3475000	3468857	3468891
1	3425000	3475000	3468870	3468888
1	3425000	3475000	3469659	3469692
1	3425000	3475000	3469659	3469693
1	3425000	3475000	3469753	3469787
1	3425000	3475000	3470739	3470772
1	3425000	3475000	3471654	3471687
1	3425000	3475000	3471991	3472025
1	3425000	3475000	3472219	3472252
1	3425000	3475000	3473002	3473035
1	3425000	3475000	3473517	3473550
1	3425000	3475000	3473532	3473550
1	3425000	3475000	3474514	3474547
1	3425000	3475000	3474529	3474547
1	3425000	3475000	3474562	3474595
1	3425000	3475000	3474571	3474605
1	3425000	3475000	3474581	3474615
1	3425000	3475000	3474587	3474605
1	3425000	3475000	3474616	3474649
1	3425000	3475000	3425395	3425428
1	3425000	3475000	3425437	3425471
1	3425000	3475000	3425506	3425540
1	3425000	3475000	3425739	3425773
1	3425000	3475000	3425792	3425826
1	3425000	3475000	3425793	3425826
1	3425000	3475000	3426019	3426037
1	3425000	3475000	3428115	3428133
1	3425000	3475000	3429401	3429419
1	3425000	3475000	3429547	3429581
1	3425000	3475000	3429943	3429976
1	3425000	3475000	3429969	3429987
1	3425000	3475000	3429969	3430002
1	3425000	3475000	3431226	3431259
1	3425000	3475000	3431307	3431341
1	3425000	3475000	3431690	3431708
1	3425000	3475000	3431690	3431723
1	3425000	3475000	3431712	3431746
1	3425000	3475000	3431831	3431864
1	3425000	3475000	3432292	3432325
1	3425000	3475000	3432870	3432903
1	3425000	3475000	3433334	3433352
1	3425000	3475000	3433334	3433368
1	3425000	3475000	3434091	3434125
1	3425000	3475000	3434150	3434183
1	3425000	3475000	3434654	3434688
1	3425000	3475000	3434826	3434844
1	3425000	3475000	3435054	3435087
1	3425000	3475000	3435105	3435123
1	3425000	3475000	3435929	3435962
1	3425000	3475000	3436254	3436287
1	3425000	3475000	3437233	3437251
1	3425000	3475000	3437985	3438003
1	3425000	3475000	3440320	3440353
1	3425000	3475000	3440752	3440770
1	3425000	3475000	3440752	3440785
1	3425000	3475000	3442081	3442114
1	3425000	3475000	3444356	3444390
1	3425000	3475000	3448163	3448181
1	3425000	3475000	3449806	3449824
1	3425000	3475000	3451324	3451357
1	3425000	3475000	3451485	3451503
1	3425000	3475000	3452150	3452183
1	3425000	3475000	3452416	3452449
1	3425000	3475000	3453247	3453281
1	3425000	3475000	3453346	3453380
1	3425000	3475000	3453356	3453390
1	3425000	3475000	3453702	3453735
1	3425000	3475000	3453975	3454009
1	3425000	3475000	3453978	3454012
1	3425000	3475000	3454619	3454652
1	3425000	3475000	3454690	3454723
1	3425000	3475000	3455059	3455077
1	3425000	3475000	3455091	3455109
1	3425000	3475000	3455091	3455125
1	3425000	3475000	3455101	3455119
1	3425000	3475000	3455101	3455135
1	3425000	3475000	3456072	3456105
1	3425000	3475000	3456760	3456793
1	3425000	3475000	3457298	3457331
1	3425000	3475000	3457326	3457359
1	3425000	3475000	3457793	3457811
1	3425000	3475000	3457793	3457827
1	3425000	3475000	3458363	3458397
1	3425000	3475000	3458444	3458462
1	3425000	3475000	3459099	3459117
1	3425000	3475000	3459099	3459133
1	3425000	3475000	3459256	3459289
1	3425000	3475000	3459462	3459495
1	3425000	3475000	3459793	3459811
1	3425000	3475000	3459793	3459826
1	3425000	3475000	3460285	3460318
1	3425000	3475000	3460831	3460865
1	3425000	3475000	3460834	3460868
1	3425000	3475000	3461729	3461747
1	3425000	3475000	3461729	3461763
1	3425000	3475000	3462158	3462176
1	3425000	3475000	3462158	3462191
1	3425000	3475000	3462871	3462889
1	3425000	3475000	3462871	3462904
1	3425000	3475000	3462871	3462905
1	3425000	3475000	3464171	3464189
1	3425000	3475000	3464323	3464356
1	3425000	3475000	3464518	3464551
1	3425000	3475000	3464725	3464743
1	3425000	3475000	3464725	3464758
1	3425000	3475000	3464843	3464876
1	3425000	3475000	3464874	3464907
1	3425000	3475000	3464922	3464940
1	3425000	3475000	3464922	3464955
1	3425000	3475000	3465057	3465091
1	3425000	3475000	3465064	3465097
1	3425000	3475000	3465718	3465736
1	3425000	3475000	3465718	3465752
1	3425000	3475000	3466020	3466038
1	3425000	3475000	3466874	3466892
1	3425000	3475000	3466874	3466908
1	3425000	3475000	3466946	3466980
1	3425000	3475000	3467508	3467542
1	3425000	3475000	3467551	3467585
1	3425000	3475000	3467831	3467849
1	3425000	3475000	3467831	3467865
1	3425000	3475000	3468136	3468169
1	3425000	3475000	3468551	3468569
1	3425000	3475000	3468868	3468886
1	3425000	3475000	3469036	3469070
1	3425000	3475000	3469478	3469512
1	3425000	3475000	3469662	3469680
1	3425000	3475000	3469662	3469696
1	3425000	3475000	3471382	3471416
1	3425000	3475000	3471718	3471736
1	3425000	3475000	3471958	3471976
1	3425000	3475000	3472137	3472171
1	3425000	3475000	3472785	3472818
1	3425000	3475000	3474366	3474400
1	3425000	3475000	3474585	3474603
1	3425000	3475000	3474585	3474618
1	3875000	3925000	3876907	3876940
1	3875000	3925000	3876922	3876940
1	3875000	3925000	3878010	3878043
1	3875000	3925000	3879551	3879569
1	3875000	3925000	3880570	3880588
1	3875000	3925000	3881241	3881275
1	3875000	3925000	3881257	3881275
1	3875000	3925000	3883353	3883387
1	3875000	3925000	3883369	3883387
1	3875000	3925000	3884702	3884736
1	3875000	3925000	3885752	3885785
1	3875000	3925000	3885771	3885804
1	3875000	3925000	3886033	3886066
1	3875000	3925000	3886669	3886703
1	3875000	3925000	3886794	3886828
1	3875000	3925000	3886898	3886932
1	3875000	3925000	3889600	3889633
1	3875000	3925000	3889615	3889633
1	3875000	3925000	3890125	3890158
1	3875000	3925000	3890522	3890555
1	3875000	3925000	3891185	3891218
1	3875000	3925000	3891200	3891218
1	3875000	3925000	3892678	3892711
1	3875000	3925000	3893010	3893043
1	3875000	3925000	3894224	3894242
1	3875000	3925000	3894744	3894778
1	3875000	3925000	3898285	3898303
1	3875000	3925000	3899560	3899578
1	3875000	3925000	3899644	3899677
1	3875000	3925000	3899769	3899803
1	3875000	3925000	3900106	3900124
1	3875000	3925000	3901168	3901201
1	3875000	3925000	3901171	3901204
1	3875000	3925000	3902276	3902309
1	3875000	3925000	3902330	3902364
1	3875000	3925000	3902331	3902364
1	3875000	3925000	3902346	3902364
1	3875000	3925000	3902562	3902596
1	3875000	3925000	3903234	3903268
1	3875000	3925000	3903598	3903631
1	3875000	3925000	3903613	3903631
1	3875000	3925000	3904236	3904270
1	3875000	3925000	3904252	3904270
1	3875000	3925000	3904569	3904603
1	3875000	3925000	3904969	3905002
1	3875000	3925000	3904984	3905002
1	3875000	3925000	3905464	3905498
1	3875000	3925000	3905480	3905498
1	3875000	3925000	3905556	3905589
1	3875000	3925000	3905783	3905817
1	3875000	3925000	3906161	3906195
1	3875000	3925000	3906282	3906315
1	3875000	3925000	3906453	3906471
1	3875000	3925000	3906706	3906740
1	3875000	3925000	3906722	3906740
1	3875000	3925000	3907166	3907184
1	3875000	3925000	3907362	3907395
1	3875000	3925000	3907362	3907396
1	3875000	3925000	3908812	3908845
1	3875000	3925000	3909578	3909611
1	3875000	3925000	3910485	3910518
1	3875000	3925000	3910556	3910590
1	3875000	3925000	3910898	3910931
1	3875000	3925000	3910938	3910971
1	3875000	3925000	3910953	3910971
1	3875000	3925000	3911124	3911157
1	3875000	3925000	3911254	3911287
1	3875000	3925000	3911606	3911624
1	3875000	3925000	3911825	3911858
1	3875000	3925000	3912785	3912818
1	3875000	3925000	3913247	3913281
1	3875000	3925000	3914175	3914208
1	3875000	3925000	3914878	3914911
1	3875000	3925000	3914938	3914971
1	3875000	3925000	3914994	3915027
1	3875000	3925000	3915765	3915799
1	3875000	3925000	3915908	3915941
1	3875000	3925000	3916512	3916546
1	3875000	3925000	3919110	3919143
1	3875000	3925000	3919329	3919363
1	3875000	3925000	3919345	3919363
1	3875000	3925000	3919711	3919744
1	3875000	3925000	3921262	3921295
1	3875000	3925000	3922000	3922034
1	3875000	3925000	3922041	3922075
1	3875000	3925000	3922057	3922075
1	3875000	3925000	3924094	3924128
1	3875000	3925000	3876282	3876316
1	3875000	3925000	3876740	3876758
1	3875000	3925000	3876740	3876773
1	3875000	3925000	3876740	3876774
1	3875000	3925000	3878001	3878034
1	3875000	3925000	3880562	3880595
1	3875000	3925000	3880565	3880598
1	3875000	3925000	3880581	3880615
1	3875000	3925000	3880693	3880727
1	3875000	3925000	3881166	3881200
1	3875000	3925000	3881233	3881266
1	3875000	3925000	3882161	3882195
1	3875000	3925000	3883083	3883116
1	3875000	3925000	3884426	3884460
1	3875000	3925000	3885933	3885967
1	3875000	3925000	3886748	3886766
1	3875000	3925000	3886748	3886781
1	3875000	3925000	3886748	3886782
1	3875000	3925000	3886889	3886923
1	3875000	3925000	3887003	3887021
1	3875000	3925000	3890692	3890725
1	3875000	3925000	3890836	3890854
1	3875000	3925000	3890836	3890870
1	3875000	3925000	3891267	3891285
1	3875000	3925000	3891267	3891301
1	3875000	3925000	3891313	3891331
1	3875000	3925000	3891313	3891347
1	3875000	3925000	3891720	3891754
1	3875000	3925000	3892955	3892989
1	3875000	3925000	3893008	3893041
1	3875000	3925000	3894757	3894791
1	3875000	3925000	3895031	3895064
1	3875000	3925000	3895304	3895337
1	3875000	3925000	3895601	3895635
1	3875000	3925000	3898799	3898817
1	3875000	3925000	3898799	3898832
1	3875000	3925000	3899746	3899764
1	3875000	3925000	3899746	3899779
1	3875000	3925000	3899746	3899780
1	3875000	3925000	3899959	3899993
1	3875000	3925000	3900074	3900108
1	3875000	3925000	3900338	3900371
1	3875000	3925000	3902102	3902136
1	3875000	3925000	3902334	3902367
1	3875000	3925000	3902344	3902362
1	3875000	3925000	3902344	3902377
1	3875000	3925000	3902399	3902432
1	3875000	3925000	3904238	3904271
1	3875000	3925000	3904317	3904335
1	3875000	3925000	3904385	3904418
1	3875000	3925000	3904572	3904590
1	3875000	3925000	3904572	3904606
1	3875000	3925000	3904718	3904751
1	3875000	3925000	3905293	3905326
1	3875000	3925000	3906424	3906457
1	3875000	3925000	3906540	3906573
1	3875000	3925000	3906566	3906600
1	3875000	3925000	3907076	3907094
1	3875000	3925000	3907375	3907393
1	3875000	3925000	3907375	3907408
1	3875000	3925000	3907375	3907409
1	3875000	3925000	3908772	3908806
1	3875000	3925000	3909138	3909156
1	3875000	3925000	3909321	3909339
1	3875000	3925000	3910705	3910723
1	3875000	3925000	3910705	3910738
1	3875000	3925000	3911258	3911291
1	3875000	3925000	3911315	3911348
1	3875000	3925000	3911510	3911544
1	3875000	3925000	3911649	3911683
1	3875000	3925000	3912065	3912098
1	3875000	3925000	3912186	3912204
1	3875000	3925000	3912421	3912455
1	3875000	3925000	3912601	3912619
1	3875000	3925000	3912601	3912635
1	3875000	3925000	3913000	3913034
1	3875000	3925000	3913105	3913123
1	3875000	3925000	3913204	3913238
1	3875000	3925000	3913541	3913575
1	3875000	3925000	3913931	3913964
1	3875000	3925000	3914034	3914052
1	3875000	3925000	3914476	3914510
1	3875000	3925000	3914901	3914935
1	3875000	3925000	3914928	3914962
1	3875000	3925000	3914969	3915002
1	3875000	3925000	3915895	3915929
1	3875000	3925000	3915899	3915932
1	3875000	3925000	3915958	3915991
1	3875000	3925000	3917851	3917869
1	3875000	3925000	3917851	3917885
1	3875000	3925000	3918054	3918072
1	3875000	3925000	3919212	3919245
1	3875000	3925000	3919258	3919292
1	3875000	3925000	3919389	3919407
1	3875000	3925000	3920991	3921024
1	4625000	4675000	4625014	4625032
1	4625000	4675000	4625122	4625156
1	4625000	4675000	4625289	4625307
1	4625000	4675000	4625763	4625796
1	4625000	4675000	4626020	4626038
1	4625000	4675000	4626207	4626225
1	4625000	4675000	4626274	4626292
1	4625000	4675000	4626304	4626337
1	4625000	4675000	4626319	4626337
1	4625000	4675000	4626638	4626672
1	4625000	4675000	4626753	4626787
1	4625000	4675000	4627509	4627542
1	4625000	4675000	4627528	4627561
1	4625000	4675000	4627691	4627725
1	4625000	4675000	4629813	4629831
1	4625000	4675000	4631579	4631597
1	4625000	4675000	4633438	4633471
1	4625000	4675000	4635271	4635305
1	4625000	4675000	4636455	4636488
1	4625000	4675000	4638132	4638166
1	4625000	4675000	4638480	4638514
1	4625000	4675000	4644775	4644808
1	4625000	4675000	4644790	4644808
1	4625000	4675000	4646189	4646223
1	4625000	4675000	4646803	4646836
1	4625000	4675000	4648478	4648512
1	4625000	4675000	4648494	4648512
1	4625000	4675000	4650087	4650121
1	4625000	4675000	4650599	4650633
1	4625000	4675000	4651248	4651281
1	4625000	4675000	4652358	4652391
1	4625000	4675000	4652568	4652601
1	4625000	4675000	4652730	4652763
1	4625000	4675000	4652745	4652763
1	4625000	4675000	4652915	4652949
1	4625000	4675000	4654324	4654357
1	4625000	4675000	4654442	4654475
1	4625000	4675000	4655140	4655158
1	4625000	4675000	4655277	4655310
1	4625000	4675000	4655284	4655317
1	4625000	4675000	4655292	4655310
1	4625000	4675000	4655299	4655317
1	4625000	4675000	4655552	4655586
1	4625000	4675000	4655572	4655606
1	4625000	4675000	4655588	4655606
1	4625000	4675000	4655721	4655754
1	4625000	4675000	4656032	4656066
1	4625000	4675000	4656442	4656476
1	4625000	4675000	4656458	4656476
1	4625000	4675000	4657453	4657487
1	4625000	4675000	4657690	4657724
1	4625000	4675000	4657979	4658012
1	4625000	4675000	4658022	4658056
1	4625000	4675000	4658696	4658714
1	4625000	4675000	4659336	4659369
1	4625000	4675000	4659351	4659369
1	4625000	4675000	4659620	4659653
1	4625000	4675000	4659635	4659653
1	4625000	4675000	4661372	4661405
1	4625000	4675000	4662301	4662334
1	4625000	4675000	4662533	4662566
1	4625000	4675000	4662611	4662644
1	4625000	4675000	4662902	4662935
1	4625000	4675000	4662917	4662935
1	4625000	4675000	4662981	4663015
1	4625000	4675000	4663033	4663066
1	4625000	4675000	4664521	4664555
1	4625000	4675000	4665556	4665589
1	4625000	4675000	4667613	4667631
1	4625000	4675000	4667666	4667699
1	4625000	4675000	4668776	4668794
1	4625000	4675000	4669456	4669490
1	4625000	4675000	4671533	4671566
1	4625000	4675000	4671548	4671566
1	4625000	4675000	4671984	4672017
1	4625000	4675000	4672213	4672231
1	4625000	4675000	4673104	4673122
1	4625000	4675000	4673592	4673625
1	4625000	4675000	4673703	4673736
1	4625000	4675000	4673718	4673736
1	4625000	4675000	4674166	4674199
1	4625000	4675000	4674181	4674199
1	4625000	4675000	4674612	4674645
1	4625000	4675000	4626826	4626844
1	4625000	4675000	4627534	4627552
1	4625000	4675000	4627534	4627568
1	4625000	4675000	4627665	4627699
1	4625000	4675000	4629811	4629844
1	4625000	4675000	4629907	4629925
1	4625000	4675000	4630128	4630161
1	4625000	4675000	4630803	4630821
1	4625000	4675000	4631531	4631549
1	4625000	4675000	4631531	4631565
1	4625000	4675000	4631969	4632002
1	4625000	4675000	4632112	4632130
1	4625000	4675000	4634515	4634549
1	4625000	4675000	4634583	4634601
1	4625000	4675000	4634606	4634640
1	4625000	4675000	4635241	4635259
1	4625000	4675000	4636848	4636881
1	4625000	4675000	4638139	4638172
1	4625000	4675000	4640673	4640707
1	4625000	4675000	4640969	4640987
1	4625000	4675000	4640969	4641002
1	4625000	4675000	4642655	4642688
1	4625000	4675000	4642781	4642814
1	4625000	4675000	4642925	4642943
1	4625000	4675000	4644355	4644389
1	4625000	4675000	4644536	4644569
1	4625000	4675000	4649133	4649151
1	4625000	4675000	4649862	4649896
1	4625000	4675000	4652660	4652694
1	4625000	4675000	4652736	4652769
1	4625000	4675000	4654280	4654313
1	4625000	4675000	4654293	4654326
1	4625000	4675000	4654407	4654441
1	4625000	4675000	4654426	4654459
1	4625000	4675000	4655627	4655660
1	4625000	4675000	4655809	4655842
1	4625000	4675000	4656012	4656046
1	4625000	4675000	4656293	4656327
1	4625000	4675000	4657010	4657043
1	4625000	4675000	4657403	4657421
1	4625000	4675000	4657430	4657463
1	4625000	4675000	4658674	4658708
1	4625000	4675000	4658845	4658878
1	4625000	4675000	4658904	4658937
1	4625000	4675000	4659571	4659589
1	4625000	4675000	4659571	4659605
1	4625000	4675000	4659633	4659666
1	4625000	4675000	4661375	4661408
1	4625000	4675000	4662714	4662748
1	4625000	4675000	4663532	4663566
1	4625000	4675000	4664549	4664582
1	4625000	4675000	4664663	4664681
1	4625000	4675000	4664663	4664696
1	4625000	4675000	4665157	4665191
1	4625000	4675000	4665637	4665671
1	4625000	4675000	4668286	4668319
1	4625000	4675000	4668735	4668769
1	4625000	4675000	4669833	4669851
1	4625000	4675000	4669833	4669866
1	4625000	4675000	4670818	4670852
1	4625000	4675000	4671546	4671564
1	4625000	4675000	4671874	4671908
1	4625000	4675000	4673537	4673555
1	4625000	4675000	4673537	4673570
1	4625000	4675000	4674653	4674671
1	5425000	5475000	5427411	5427445
1	5425000	5475000	5427427	5427445
1	5425000	5475000	5427442	5427476
1	5425000	5475000	5429739	5429772
1	5425000	5475000	5429755	5429789
1	5425000	5475000	5429771	5429789
1	5425000	5475000	5430058	5430091
1	5425000	5475000	5430408	5430426
1	5425000	5475000	5430726	5430759
1	5425000	5475000	5432533	5432566
1	5425000	5475000	5433045	5433078
1	5425000	5475000	5435839	5435873
1	5425000	5475000	5435855	5435873
1	5425000	5475000	5436111	5436145
1	5425000	5475000	5438342	5438376
1	5425000	5475000	5442105	5442123
1	5425000	5475000	5442580	5442598
1	5425000	5475000	5444259	5444292
1	5425000	5475000	5447039	5447072
1	5425000	5475000	5447387	5447420
1	5425000	5475000	5448664	5448698
1	5425000	5475000	5448680	5448698
1	5425000	5475000	5448967	5449000
1	5425000	5475000	5451833	5451866
1	5425000	5475000	5453044	5453078
1	5425000	5475000	5453137	5453171
1	5425000	5475000	5453632	5453666
1	5425000	5475000	5453690	5453724
1	5425000	5475000	5453706	5453724
1	5425000	5475000	5453964	5453998
1	5425000	5475000	5454924	5454942
1	5425000	5475000	5456302	5456335
1	5425000	5475000	5458178	5458212
1	5425000	5475000	5459197	5459215
1	5425000	5475000	5461045	5461078
1	5425000	5475000	5461060	5461078
1	5425000	5475000	5461347	5461380
1	5425000	5475000	5462804	5462838
1	5425000	5475000	5462817	5462850
1	5425000	5475000	5462817	5462851
1	5425000	5475000	5463600	5463633
1	5425000	5475000	5463615	5463633
1	5425000	5475000	5464634	5464667
1	5425000	5475000	5465725	5465758
1	5425000	5475000	5466191	5466225
1	5425000	5475000	5466194	5466228
1	5425000	5475000	5468295	5468328
1	5425000	5475000	5469765	5469798
1	5425000	5475000	5470163	5470197
1	5425000	5475000	5470180	5470214
1	5425000	5475000	5470197	5470231
1	5425000	5475000	5472410	5472443
1	5425000	5475000	5473618	5473636
1	5425000	5475000	5474141	5474174
1	5425000	5475000	5474156	5474174
1	5425000	5475000	5474994	5475027
1	5425000	5475000	5427050	5427068
1	5425000	5475000	5427050	5427083
1	5425000	5475000	5430406	5430424
1	5425000	5475000	5433833	5433867
1	5425000	5475000	5436993	5437027
1	5425000	5475000	5438599	5438617
1	5425000	5475000	5440215	5440248
1	5425000	5475000	5443390	5443408
1	5425000	5475000	5444587	5444620
1	5425000	5475000	5445430	5445448
1	5425000	5475000	5445430	5445464
1	5425000	5475000	5445572	5445590
1	5425000	5475000	5445572	5445605
1	5425000	5475000	5447460	5447478
1	5425000	5475000	5447460	5447493
1	5425000	5475000	5447831	5447865
1	5425000	5475000	5448678	5448711
1	5425000	5475000	5449482	5449516
1	5425000	5475000	5449847	5449865
1	5425000	5475000	5451246	5451280
1	5425000	5475000	5451766	5451800
1	5425000	5475000	5452210	5452228
1	5425000	5475000	5452210	5452243
1	5425000	5475000	5452601	5452634
1	5425000	5475000	5453057	5453075
1	5425000	5475000	5454897	5454930
1	5425000	5475000	5456248	5456266
1	5425000	5475000	5456662	5456695
1	5425000	5475000	5461012	5461045
1	5425000	5475000	5462783	5462801
1	5425000	5475000	5464637	5464670
1	5425000	5475000	5464644	5464678
1	5425000	5475000	5466007	5466040
1	5425000	5475000	5466655	5466688
1	5425000	5475000	5468712	5468746
1	5425000	5475000	5469258	5469276
1	5425000	5475000	5469386	5469420
1	5425000	5475000	5470348	5470366
1	5425000	5475000	5472423	5472456
1	5425000	5475000	5474840	5474873
1	5875000	5925000	5875038	5875056
1	5875000	5925000	5875130	5875164
1	5875000	5925000	5875169	5875203
1	5875000	5925000	5875496	5875530
1	5875000	5925000	5875612	5875646
1	5875000	5925000	5875699	5875733
1	5875000	5925000	5875787	5875820
1	5875000	5925000	5876170	5876204
1	5875000	5925000	5876186	5876204
1	5875000	5925000	5877153	5877186
1	5875000	5925000	5877168	5877186
1	5875000	5925000	5877549	5877583
1	5875000	5925000	5877565	5877583
1	5875000	5925000	5879619	5879653
1	5875000	5925000	5879951	5879985
1	5875000	5925000	5881560	5881594
1	5875000	5925000	5882115	5882148
1	5875000	5925000	5883373	5883407
1	5875000	5925000	5883615	5883648
1	5875000	5925000	5883660	5883693
1	5875000	5925000	5883765	5883798
1	5875000	5925000	5883780	5883798
1	5875000	5925000	5883939	5883972
1	5875000	5925000	5885868	5885902
1	5875000	5925000	5887507	5887541
1	5875000	5925000	5887523	5887541
1	5875000	5925000	5887769	5887803
1	5875000	5925000	5888852	5888870
1	5875000	5925000	5889022	5889055
1	5875000	5925000	5889062	5889095
1	5875000	5925000	5889485	5889518
1	5875000	5925000	5889500	5889518
1	5875000	5925000	5889516	5889534
1	5875000	5925000	5889563	5889596
1	5875000	5925000	5889864	5889898
1	5875000	5925000	5889900	5889918
1	5875000	5925000	5890546	5890579
1	5875000	5925000	5890928	5890961
1	5875000	5925000	5891953	5891986
1	5875000	5925000	5891953	5891987
1	5875000	5925000	5891969	5891987
1	5875000	5925000	5892466	5892500
1	5875000	5925000	5895405	5895438
1	5875000	5925000	5896166	5896199
1	5875000	5925000	5898528	5898562
1	5875000	5925000	5899055	5899089
1	5875000	5925000	5901845	5901879
1	5875000	5925000	5902333	5902366
1	5875000	5925000	5902346	5902379
1	5875000	5925000	5902361	5902379
1	5875000	5925000	5903906	5903924
1	5875000	5925000	5905441	5905475
1	5875000	5925000	5905536	5905569
1	5875000	5925000	5907289	5907323
1	5875000	5925000	5908037	5908071
1	5875000	5925000	5908219	5908237
1	5875000	5925000	5908334	5908367
1	5875000	5925000	5908937	5908970
1	5875000	5925000	5908940	5908973
1	5875000	5925000	5909113	5909146
1	5875000	5925000	5909932	5909965
1	5875000	5925000	5910404	5910437
1	5875000	5925000	5911412	5911445
1	5875000	5925000	5911856	5911889
1	5875000	5925000	5911871	5911889
1	5875000	5925000	5912145	5912178
1	5875000	5925000	5912722	5912756
1	5875000	5925000	5913638	5913671
1	5875000	5925000	5913653	5913671
1	5875000	5925000	5914879	5914913
1	5875000	5925000	5914966	5915000
1	5875000	5925000	5914977	5915010
1	5875000	5925000	5914992	5915010
1	5875000	5925000	5915956	5915989
1	5875000	5925000	5917217	5917250
1	5875000	5925000	5920337	5920370
1	5875000	5925000	5922202	5922235
1	5875000	5925000	5922217	5922235
1	5875000	5925000	5922693	5922727
1	5875000	5925000	5922729	5922763
1	5875000	5925000	5922765	5922799
1	5875000	5925000	5922801	5922835
1	5875000	5925000	5922837	5922871
1	5875000	5925000	5923640	5923673
1	5875000	5925000	5875712	5875746
1	5875000	5925000	5876183	5876216
1	5875000	5925000	5876475	5876509
1	5875000	5925000	5877126	5877144
1	5875000	5925000	5877630	5877663
1	5875000	5925000	5878210	5878228
1	5875000	5925000	5878210	5878243
1	5875000	5925000	5881061	5881095
1	5875000	5925000	5881235	5881268
1	5875000	5925000	5881305	5881338
1	5875000	5925000	5881806	5881824
1	5875000	5925000	5881806	5881840
1	5875000	5925000	5881809	5881827
1	5875000	5925000	5881921	5881939
1	5875000	5925000	5881921	5881955
1	5875000	5925000	5882884	5882902
1	5875000	5925000	5883273	5883306
1	5875000	5925000	5883328	5883361
1	5875000	5925000	5886299	5886332
1	5875000	5925000	5887317	5887335
1	5875000	5925000	5887317	5887350
1	5875000	5925000	5889498	5889516
1	5875000	5925000	5889835	5889853
1	5875000	5925000	5889835	5889869
1	5875000	5925000	5891377	5891410
1	5875000	5925000	5891467	5891501
1	5875000	5925000	5893858	5893876
1	5875000	5925000	5893858	5893891
1	5875000	5925000	5893858	5893892
1	5875000	5925000	5894157	5894175
1	5875000	5925000	5898318	5898351
1	5875000	5925000	5898435	5898469
1	5875000	5925000	5899066	5899099
1	5875000	5925000	5899536	5899570
1	5875000	5925000	5904954	5904987
1	5875000	5925000	5907066	5907099
1	5875000	5925000	5907102	5907135
1	5875000	5925000	5907631	5907665
1	5875000	5925000	5908128	5908161
1	5875000	5925000	5909017	5909035
1	5875000	5925000	5909017	5909050
1	5875000	5925000	5909145	5909178
1	5875000	5925000	5909770	5909788
1	5875000	5925000	5909770	5909804
1	5875000	5925000	5910296	5910330
1	5875000	5925000	5910417	5910435
1	5875000	5925000	5911459	5911477
1	5875000	5925000	5913588	5913606
1	5875000	5925000	5915170	5915203
1	5875000	5925000	5916164	5916182
1	5875000	5925000	5916164	5916198
1	5875000	5925000	5917856	5917889
1	5875000	5925000	5921892	5921925
1	5875000	5925000	5922593	5922626
1	5875000	5925000	5923653	5923671
1	6675000	6725000	6677780	6677813
1	6675000	6725000	6682886	6682920
1	6675000	6725000	6684950	6684968
1	6675000	6725000	6689432	6689466
1	6675000	6725000	6701486	6701519
1	6675000	6725000	6701523	6701556
1	6675000	6725000	6701694	6701727
1	6675000	6725000	6701945	6701979
1	6675000	6725000	6706102	6706135
1	6675000	6725000	6707874	6707908
1	6675000	6725000	6708013	6708031
1	6675000	6725000	6710443	6710476
1	6675000	6725000	6710480	6710513
1	6675000	6725000	6710536	6710569
1	6675000	6725000	6712689	6712722
1	6675000	6725000	6714006	6714040
1	6675000	6725000	6714022	6714040
1	6675000	6725000	6715085	6715118
1	6675000	6725000	6715177	6715211
1	6675000	6725000	6715406	6715440
1	6675000	6725000	6715509	6715543
1	6675000	6725000	6715610	6715643
1	6675000	6725000	6715718	6715736
1	6675000	6725000	6715834	6715852
1	6675000	6725000	6718408	6718441
1	6675000	6725000	6720149	6720183
1	6675000	6725000	6720165	6720183
1	6675000	6725000	6721429	6721463
1	6675000	6725000	6721528	6721561
1	6675000	6725000	6675012	6675045
1	6675000	6725000	6675918	6675951
1	6675000	6725000	6676144	6676177
1	6675000	6725000	6680997	6681030
1	6675000	6725000	6681781	6681814
1	6675000	6725000	6683147	6683180
1	6675000	6725000	6686470	6686504
1	6675000	6725000	6687867	6687901
1	6675000	6725000	6691606	6691624
1	6675000	6725000	6691620	6691653
1	6675000	6725000	6692353	6692371
1	6675000	6725000	6692353	6692387
1	6675000	6725000	6693743	6693776
1	6675000	6725000	6697919	6697937
1	6675000	6725000	6697919	6697952
1	6675000	6725000	6698006	6698024
1	6675000	6725000	6699810	6699843
1	6675000	6725000	6701275	6701293
1	6675000	6725000	6701320	6701353
1	6675000	6725000	6701458	6701491
1	6675000	6725000	6701533	6701566
1	6675000	6725000	6701568	6701586
1	6675000	6725000	6701568	6701601
1	6675000	6725000	6701897	6701915
1	6675000	6725000	6701897	6701931
1	6675000	6725000	6701952	6701970
1	6675000	6725000	6701952	6701986
1	6675000	6725000	6702216	6702249
1	6675000	6725000	6702972	6703005
1	6675000	6725000	6704696	6704730
1	6675000	6725000	6705254	6705272
1	6675000	6725000	6706626	6706660
1	6675000	6725000	6709014	6709048
1	6675000	6725000	6710658	6710691
1	6675000	6725000	6711590	6711624
1	6675000	6725000	6711791	6711809
1	6675000	6725000	6712410	6712444
[truncated: 237,694+ more rows]
