# Supplementary material for: Primary osteoarthritis chondrocyte map of chromatin conformation reveals novel candidate effector genes
Source: Ann Rheum Dis. 2024 Mar 13;83(8):1048–59. doi: 10.1136/ard-2023-224945 (PMC11287644; doi:10.1136/ard-2023-224945)
Supplement: Supplementary data [file ard-2023-224945supp019.xlsx]

## Sheet: Sheet1
Supplemental Table 8: Osteoarthritis-related variants found within chromatin loops identified in this study within these loops: Variants are from the 95% credible set, with a posterior probability of causality >3% from Boer et al. (PMID : 34450027; GO1); Source is the loop algorithm used for identification of these loops, Abbreviations: P-value = P-value of credible set variant from PMID : 344500…
Chromosome	Loop Anchor 1 position	Loop Anchor 2 position	Credible set variant rsid	Credible set variant position	Source	GO1 lead variant rsid	GO1 lead variant position (chromosome:position b37)	P-Value	PP	LD
6	35116294 - 35173706	35176294 - 35233706	rs2038740	35146765	FanC	rs2038740	6:35114542	6.195e-10	0.337959	1
6	35116294 - 35173706	35176294 - 35233706	rs9394274	35147134	FanC	rs2038740	6:35114542	6.201e-10	0.337959	1
15	67049080 - 67085920	67089080 - 67125920	rs7163797	67072574	FanC	rs12908498	15:67366488	1.476e-15	0.0424531	0.996013
15	67049080 - 67085920	67089080 - 67125920	rs12901372	67078168	FanC	rs12908498	15:67366488	2.939e-16	0.222733	0.909156
15	67049080 - 67085920	67089080 - 67125920	rs10518707	67073284	FanC	rs12908498	15:67366488	1.474e-15	0.0424531	0.996013
15	67049080 - 67085920	67089080 - 67125920	rs7177795	67074495	FanC	rs12908498	15:67366488	1.736e-15	0.0389403	0.996013
15	67049080 - 67085920	67089080 - 67125920	rs7178381	67074846	FanC	rs12908498	15:67366488	1.643e-15	0.0424531	0.996013
15	67049080 - 67085920	67089080 - 67125920	rs1498506	67075296	FanC	rs12908498	15:67366488	1.48e-15	0.0462884	0.996013
15	67049080 - 67085920	67089080 - 67125920	rs1498507	67075368	FanC	rs12908498	15:67366488	1.463e-15	0.0462884	0.996013
15	67049080 - 67085920	67089080 - 67125920	rs28613758	67076321	FanC	rs12908498	15:67366488	8.263e-16	0.0850826	1
15	67049080 - 67085920	67089080 - 67125920	rs12908498	67074150	FanC	rs12908498	15:67366488	1.85e-16	0.361447	1
12	47982323 - 48027677	48032323 - 48077677	rs7967762	48026431	FanC	rs7967762	12:48420214	4.411e-10	0.0751441	1
6	26034380 - 26075620	26084380 - 26125620	rs144861591	26072764	FanC	rs79220007	6:26098474	2.37e-09	0.253039	0.976258
6	18378955 - 18406045	18418955 - 18446045	rs1886248	18399163	FanC	rs9396861	6:18404133	1.978e-10	0.299687	0.618163
6	18378955 - 18406045	18418955 - 18446045	rs9396861	18403902	FanC	rs9396861	6:18404133	9.347e-11	0.677236	1
22	27791757 - 27833243	27846757 - 27888243	rs13057169	27810971	FanC	rs11705555	22:28206912	1.836e-08	0.0413635	0.944523
22	27791757 - 27833243	27846757 - 27888243	rs11703195	27811642	FanC	rs11705555	22:28206912	2.962e-09	0.230451	0.994388
22	27791757 - 27833243	27846757 - 27888243	rs11704137	27812540	FanC	rs11705555	22:28206912	3.694e-09	0.187415	0.994405
22	27791757 - 27833243	27846757 - 27888243	rs11704274	27812741	FanC	rs11705555	22:28206912	3.132e-09	0.230451	0.994405
22	27791757 - 27833243	27846757 - 27888243	rs11705555	27810924	FanC	rs11705555	22:28206912	2.993e-09	0.230451	1
11	67247253 - 67282747	67297253 - 67332747	rs7952436	67257063	FanC	rs34560402	11:66872320	1.627e-09	0.0670517	0.770278
22	27798820 - 27831180	27848820 - 27881180	rs13057169	27810971	FanC	rs11705555	22:28206912	1.836e-08	0.0413635	0.944523
22	27798820 - 27831180	27848820 - 27881180	rs11703195	27811642	FanC	rs11705555	22:28206912	2.962e-09	0.230451	0.994388
22	27798820 - 27831180	27848820 - 27881180	rs11704137	27812540	FanC	rs11705555	22:28206912	3.694e-09	0.187415	0.994405
22	27798820 - 27831180	27848820 - 27881180	rs11704274	27812741	FanC	rs11705555	22:28206912	3.132e-09	0.230451	0.994405
22	27798820 - 27831180	27848820 - 27881180	rs11705555	27810924	FanC	rs11705555	22:28206912	2.993e-09	0.230451	1
15	67044189 - 67085811	67104189 - 67145811	rs7163797	67072574	FanC	rs12908498	15:67366488	1.476e-15	0.0424531	0.996013
15	67044189 - 67085811	67104189 - 67145811	rs12901372	67078168	FanC	rs12908498	15:67366488	2.939e-16	0.222733	0.909156
15	67044189 - 67085811	67104189 - 67145811	rs10518707	67073284	FanC	rs12908498	15:67366488	1.474e-15	0.0424531	0.996013
15	67044189 - 67085811	67104189 - 67145811	rs7177795	67074495	FanC	rs12908498	15:67366488	1.736e-15	0.0389403	0.996013
15	67044189 - 67085811	67104189 - 67145811	rs7178381	67074846	FanC	rs12908498	15:67366488	1.643e-15	0.0424531	0.996013
15	67044189 - 67085811	67104189 - 67145811	rs1498506	67075296	FanC	rs12908498	15:67366488	1.48e-15	0.0462884	0.996013
15	67044189 - 67085811	67104189 - 67145811	rs1498507	67075368	FanC	rs12908498	15:67366488	1.463e-15	0.0462884	0.996013
15	67044189 - 67085811	67104189 - 67145811	rs28613758	67076321	FanC	rs12908498	15:67366488	8.263e-16	0.0850826	1
15	67044189 - 67085811	67104189 - 67145811	rs12908498	67074150	FanC	rs12908498	15:67366488	1.85e-16	0.361447	1
11	67253104 - 67281896	67303104 - 67331896	rs7952436	67257063	FanC	rs34560402	11:66872320	1.627e-09	0.0670517	0.770278
4	1727351 - 1762649	1787351 - 1822649	rs732754	1760560	FanC	rs1530586	4:1760927	7.894e-14	0.0693546	0.988356
4	1727351 - 1762649	1787351 - 1822649	rs1530586	1759200	FanC	rs1530586	4:1760927	3.343e-14	0.16037	1
4	1727351 - 1762649	1787351 - 1822649	rs2896518	1755832	FanC	rs1530586	4:1760927	1.048e-13	0.0399344	0.95976
4	1727351 - 1762649	1787351 - 1822649	rs28699509	1757222	FanC	rs1530586	4:1760927	4.584e-14	0.0982001	0.971009
4	1727351 - 1762649	1787351 - 1822649	rs13142863	1753822	FanC	rs1530586	4:1760927	6.76e-14	0.0490871	0.95384
4	1727351 - 1762649	1787351 - 1822649	rs11724531	1751697	FanC	rs1530586	4:1760927	5.702e-14	0.0880164	0.947936
4	1730779 - 1764221	1790779 - 1824221	rs732754	1760560	FanC	rs1530586	4:1760927	7.894e-14	0.0693546	0.988356
4	1730779 - 1764221	1790779 - 1824221	rs1530586	1759200	FanC	rs1530586	4:1760927	3.343e-14	0.16037	1
4	1730779 - 1764221	1790779 - 1824221	rs2896518	1755832	FanC	rs1530586	4:1760927	1.048e-13	0.0399344	0.95976
4	1730779 - 1764221	1790779 - 1824221	rs28699509	1757222	FanC	rs1530586	4:1760927	4.584e-14	0.0982001	0.971009
4	1730779 - 1764221	1790779 - 1824221	rs13142863	1753822	FanC	rs1530586	4:1760927	6.76e-14	0.0490871	0.95384
4	1730779 - 1764221	1790779 - 1824221	rs11724531	1751697	FanC	rs1530586	4:1760927	5.702e-14	0.0880164	0.947936
19	45873913 - 45936087	45963913 - 46026087	rs8112559	45887197	FanC	rs8112559	19:46390455	7.317e-11	0.308911	1
19	45873913 - 45936087	45963913 - 46026087	rs8112972	45887347	FanC	rs8112559	19:46390455	1.163e-10	0.200972	0.989288
19	45873913 - 45936087	45963913 - 46026087	rs11550348	45884086	FanC	rs8112559	19:46390455	9.071e-11	0.279626	1
19	45873913 - 45936087	45963913 - 46026087	rs35925598	45906958	FanC	rs8112559	19:46390455	7.375e-10	0.03654	0.772585
9	107615038 - 107674962	107705038 - 107764962	rs7868525	107666176	FanC	rs79895530	9:110416422	7.716e-14	0.0846438	0.972688
9	107615038 - 107674962	107705038 - 107764962	rs7875152	107642502	FanC	rs79895530	9:110416422	1.377e-13	0.0448873	0.894928
9	107615038 - 107674962	107705038 - 107764962	rs12347610	107666741	FanC	rs79895530	9:110416422	1.141e-13	0.0457586	0.963873
9	107615038 - 107674962	107705038 - 107764962	rs12350134	107668484	FanC	rs79895530	9:110416422	8.047e-14	0.0846438	0.955196
9	107615038 - 107674962	107705038 - 107764962	rs12352414	107666742	FanC	rs79895530	9:110416422	1.231e-13	0.0437759	0.963873
9	107615038 - 107674962	107705038 - 107764962	rs79752115	107666196	FanC	rs79895530	9:110416422	7.971e-14	0.0717472	0.808659
9	107615038 - 107674962	107705038 - 107764962	rs79895530	107654141	FanC	rs79895530	9:110416422	3.859e-14	0.136786	1
9	107615038 - 107674962	107705038 - 107764962	rs12339806	107667966	FanC	rs79895530	9:110416422	8.924e-14	0.0738844	0.955196
9	107615038 - 107674962	107705038 - 107764962	rs12339850	107668058	FanC	rs79895530	9:110416422	8.68e-14	0.0773068	0.955196
19	45871496 - 45933504	45966496 - 46028504	rs8112559	45887197	FanC	rs8112559	19:46390455	7.317e-11	0.308911	1
19	45871496 - 45933504	45966496 - 46028504	rs8112972	45887347	FanC	rs8112559	19:46390455	1.163e-10	0.200972	0.989288
19	45871496 - 45933504	45966496 - 46028504	rs11550348	45884086	FanC	rs8112559	19:46390455	9.071e-11	0.279626	1
19	45871496 - 45933504	45966496 - 46028504	rs35925598	45906958	FanC	rs8112559	19:46390455	7.375e-10	0.03654	0.772585
6	35135285 - 35159715	35195285 - 35219715	rs2038740	35146765	FanC	rs2038740	6:35114542	6.195e-10	0.337959	1
6	35135285 - 35159715	35195285 - 35219715	rs9394274	35147134	FanC	rs2038740	6:35114542	6.201e-10	0.337959	1
11	74579934 - 74650066	74699934 - 74770066	rs72979233	74644478	FanC	rs72979233	11:74355523	2.515e-09	0.972211	1
9	127115001 - 127135000	127185001 - 127205000	rs10819268	127130178	FanC	rs10465114	9:129917824	1.91714e-08	0.0356162	0.976862
9	115093508 - 115136492	115193508 - 115236492	rs1929395	115094633	FanC	rs1330349	9:117840742	1.37767e-18	0.105999	0.890776
9	107609217 - 107665783	107724217 - 107780783	rs7875152	107642502	FanC	rs79895530	9:110416422	1.377e-13	0.0448873	0.894928
9	107609217 - 107665783	107724217 - 107780783	rs79895530	107654141	FanC	rs79895530	9:110416422	3.859e-14	0.136786	1
4	144682929 - 144707071	144772929 - 144797071	rs75686861	144700176	FanC	rs75686861	4:145621328	3.039e-09	0.600413	1
11	96055001 - 96075000	96145001 - 96165000	rs10831474	96063125	FanC	rs10831475	11:95796907	1.959e-11	0.117463	0.972462
11	96055001 - 96075000	96145001 - 96165000	rs10831475	96063743	FanC	rs10831475	11:95796907	5.887e-12	0.280581	1
11	96055001 - 96075000	96145001 - 96165000	rs10831476	96063746	FanC	rs10831475	11:95796907	5.887e-12	0.280581	1
11	96055001 - 96075000	96145001 - 96165000	rs10831477	96063947	FanC	rs10831475	11:95796907	6.037e-12	0.263518	1
9	126610001 - 126620000	126690001 - 126700000	rs1336980	126615576	FanC	rs62578126	9:129375338	2.63713e-12	0.0866757	1
9	126610001 - 126620000	126690001 - 126700000	rs12377624	126610831	FanC	rs62578126	9:129375338	1.93645e-12	0.117236	1
9	126610001 - 126620000	126690001 - 126700000	rs62578126	126613059	FanC	rs62578126	9:129375338	1.48999e-12	0.151497	1
9	126610001 - 126620000	126690001 - 126700000	rs10987373	126616951	FanC	rs62578126	9:129375338	4.40879e-12	0.052448	0.995764
6	35138269 - 35156731	35228269 - 35246731	rs2038740	35146765	FanC	rs2038740	6:35114542	6.195e-10	0.337959	1
6	35138269 - 35156731	35228269 - 35246731	rs9394274	35147134	FanC	rs2038740	6:35114542	6.201e-10	0.337959	1
3	188575001 - 188595000	188675001 - 188695000	rs758236099	188579521	FanC	rs747952496	3:188311659	6.88415e-10	0.0608397	-
3	188575001 - 188595000	188675001 - 188695000	rs747952496	188593871	FanC	rs747952496	3:188311659	9.59119e-11	0.0718625	1
1	227722421 - 227807579	227892421 - 227977579	rs11588850	227739541	FanC	rs11588850	1:227927242	3.528e-10	0.391126	1
1	227722421 - 227807579	227892421 - 227977579	rs11580196	227767575	FanC	rs11588850	1:227927242	6.739e-10	0.231308	1
22	37783752 - 37846248	37933752 - 37996248	rs13055462	37788678	FanC	rs12160491	22:38195796	3.856e-10	0.037293	0.92524
22	37783752 - 37846248	37933752 - 37996248	rs13056052	37788865	FanC	rs12160491	22:38195796	4.29e-10	0.0335392	0.92524
22	37783752 - 37846248	37933752 - 37996248	rs13057823	37792277	FanC	rs12160491	22:38195796	2.503e-10	0.0411157	0.929162
22	37783752 - 37846248	37933752 - 37996248	rs8142595	37791771	FanC	rs12160491	22:38195796	2.399e-10	0.0502819	0.92491
22	37783752 - 37846248	37933752 - 37996248	rs12160491	37799789	FanC	rs12160491	22:38195796	1.278e-10	0.0949964	1
22	37783752 - 37846248	37933752 - 37996248	rs12160528	37799812	FanC	rs12160491	22:38195796	1.594e-10	0.0767587	1
22	37783752 - 37846248	37933752 - 37996248	rs8136037	37787990	FanC	rs12160491	22:38195796	3.953e-10	0.035365	0.92524
22	37783752 - 37846248	37933752 - 37996248	rs8136757	37789964	FanC	rs12160491	22:38195796	4.245e-10	0.0335392	0.920685
22	37783752 - 37846248	37933752 - 37996248	rs8137848	37789987	FanC	rs12160491	22:38195796	4.223e-10	0.0335392	0.920685
12	93766257 - 93803743	93896257 - 93933743	rs2171126	93773444	FanC	rs7953280	12:94136009	6.062e-12	0.0492308	0.788134
22	37790880 - 37844120	37940880 - 37994120	rs13057823	37792277	FanC	rs12160491	22:38195796	2.503e-10	0.0411157	0.929162
22	37790880 - 37844120	37940880 - 37994120	rs8142595	37791771	FanC	rs12160491	22:38195796	2.399e-10	0.0502819	0.92491
22	37790880 - 37844120	37940880 - 37994120	rs12160491	37799789	FanC	rs12160491	22:38195796	1.278e-10	0.0949964	1
22	37790880 - 37844120	37940880 - 37994120	rs12160528	37799812	FanC	rs12160491	22:38195796	1.594e-10	0.0767587	1
1	184057253 - 184092747	184207253 - 184242747	rs1952256	184065982	FanC	rs1327123	1:184014593	2.10664e-15	0.115507	0.981979
3	52755001 - 52795000	52915001 - 52955000	rs678	52786965	FanC	rs3774354	3:52817675	2.648e-16	0.119102	0.9876
3	52755001 - 52795000	52915001 - 52955000	rs2286798	52787161	FanC	rs3774354	3:52817675	7.52e-16	0.0581593	0.975161
3	52755001 - 52795000	52915001 - 52955000	rs3774354	52783659	FanC	rs3774354	3:52817675	1.401e-16	0.228552	1
3	52755001 - 52795000	52915001 - 52955000	rs3774355	52783762	FanC	rs3774354	3:52817675	1.353e-16	0.228552	1
3	52755001 - 52795000	52915001 - 52955000	rs6792369	52777156	FanC	rs3774354	3:52817675	9.192e-16	0.0503021	0.975303
5	142420001 - 142430000	142550001 - 142560000	rs6861056	142425850	FanC	rs10062749	5:141805088	2.61e-08	0.0323203	0.955095
5	142420001 - 142430000	142550001 - 142560000	rs10062749	142425523	FanC	rs10062749	5:141805088	2.041e-09	0.368769	1
5	142420001 - 142430000	142550001 - 142560000	rs10076308	142425104	FanC	rs10062749	5:141805088	2.354e-09	0.337862	1
5	142420001 - 142430000	142550001 - 142560000	rs28538668	142425735	FanC	rs10062749	5:141805088	2.383e-08	0.0350883	0.955095
11	47911973 - 47958027	48081973 - 48128027	rs1227995	47938658	FanC	rs1631174	11:47974373	1.458e-08	0.0335532	0.995545
11	47911973 - 47958027	48081973 - 48128027	rs1631174	47952821	FanC	rs1631174	11:47974373	7.278e-09	0.0786836	1
11	47911973 - 47958027	48081973 - 48128027	rs1681630	47947600	FanC	rs1631174	11:47974373	1.066e-08	0.0470581	0.995545
4	1732547 - 1757453	1882547 - 1907453	rs2896518	1755832	FanC	rs1530586	4:1760927	1.048e-13	0.0399344	0.95976
4	1732547 - 1757453	1882547 - 1907453	rs28699509	1757222	FanC	rs1530586	4:1760927	4.584e-14	0.0982001	0.971009
4	1732547 - 1757453	1882547 - 1907453	rs13142863	1753822	FanC	rs1530586	4:1760927	6.76e-14	0.0490871	0.95384
4	1732547 - 1757453	1882547 - 1907453	rs11724531	1751697	FanC	rs1530586	4:1760927	5.702e-14	0.0880164	0.947936
1	227744949 - 227780051	227914949 - 227950051	rs11580196	227767575	FanC	rs11588850	1:227927242	6.739e-10	0.231308	1
9	126598215 - 126631785	126768215 - 126801785	rs2275241	126608297	FanC	rs62578126	9:129375338	2.04413e-12	0.111192	0.995764
9	126598215 - 126631785	126768215 - 126801785	rs1336980	126615576	FanC	rs62578126	9:129375338	2.63713e-12	0.0866757	1
9	126598215 - 126631785	126768215 - 126801785	rs12377624	126610831	FanC	rs62578126	9:129375338	1.93645e-12	0.117236	1
9	126598215 - 126631785	126768215 - 126801785	rs62578126	126613059	FanC	rs62578126	9:129375338	1.48999e-12	0.151497	1
9	126598215 - 126631785	126768215 - 126801785	rs62578127	126624581	FanC	rs62578126	9:129375338	2.23486e-12	0.101906	0.991533
9	126598215 - 126631785	126768215 - 126801785	rs10987373	126616951	FanC	rs62578126	9:129375338	4.40879e-12	0.052448	0.995764
9	126598215 - 126631785	126768215 - 126801785	rs3829849	126628521	FanC	rs62578126	9:129375338	5.59446e-12	0.0415542	0.991533
9	126598215 - 126631785	126768215 - 126801785	rs10760442	126621621	FanC	rs62578126	9:129375338	1.9842e-12	0.11448	0.991533
11	47922917 - 47952083	48092917 - 48122083	rs1227995	47938658	FanC	rs1631174	11:47974373	1.458e-08	0.0335532	0.995545
11	47922917 - 47952083	48092917 - 48122083	rs1681630	47947600	FanC	rs1631174	11:47974373	1.066e-08	0.0470581	0.995545
9	126599802 - 126625198	126769802 - 126795198	rs2275241	126608297	FanC	rs62578126	9:129375338	2.04413e-12	0.111192	0.995764
9	126599802 - 126625198	126769802 - 126795198	rs1336980	126615576	FanC	rs62578126	9:129375338	2.63713e-12	0.0866757	1
9	126599802 - 126625198	126769802 - 126795198	rs12377624	126610831	FanC	rs62578126	9:129375338	1.93645e-12	0.117236	1
9	126599802 - 126625198	126769802 - 126795198	rs62578126	126613059	FanC	rs62578126	9:129375338	1.48999e-12	0.151497	1
9	126599802 - 126625198	126769802 - 126795198	rs62578127	126624581	FanC	rs62578126	9:129375338	2.23486e-12	0.101906	0.991533
9	126599802 - 126625198	126769802 - 126795198	rs10987373	126616951	FanC	rs62578126	9:129375338	4.40879e-12	0.052448	0.995764
9	126599802 - 126625198	126769802 - 126795198	rs10760442	126621621	FanC	rs62578126	9:129375338	1.9842e-12	0.11448	0.991533
9	107622547 - 107647453	107792547 - 107817453	rs7875152	107642502	FanC	rs79895530	9:110416422	1.377e-13	0.0448873	0.894928
16	69919930 - 69985070	70139930 - 70205070	rs34195470	69921787	FanC	rs34195470	16:69955690	3.128e-13	0.445223	1
7	18330001 - 18380000	18540001 - 18590000	rs11764536	18370370	FanC	rs111844273	7:18436337	5.431e-12	0.159176	0.960558
15	98622739 - 98667261	98832739 - 98877261	rs11629600	98633348	FanC	rs12914479	15:99174828	1.035e-08	0.195256	0.981529
15	98622739 - 98667261	98832739 - 98877261	rs12901358	98630252	FanC	rs12914479	15:99174828	2.293e-08	0.109948	0.710995
15	98622739 - 98667261	98832739 - 98877261	rs12901681	98630448	FanC	rs12914479	15:99174828	2.093e-08	0.129258	0.928745
15	98622739 - 98667261	98832739 - 98877261	rs12902985	98623290	FanC	rs12914479	15:99174828	3.869e-08	0.0715525	0.846028
15	98622739 - 98667261	98832739 - 98877261	rs12917566	98637015	FanC	rs12914479	15:99174828	3.483e-08	0.086762	0.890965
15	98622739 - 98667261	98832739 - 98877261	rs12914479	98631599	FanC	rs12914479	15:99174828	7.117e-09	0.306609	1
11	12670001 - 12700000	12870001 - 12900000	rs7105783	12698247	FanC	rs3993110	11:12794530	8.511e-11	0.051319	0.794206
15	67070001 - 67080000	67250001 - 67260000	rs7163797	67072574	FanC	rs12908498	15:67366488	1.476e-15	0.0424531	0.996013
15	67070001 - 67080000	67250001 - 67260000	rs12901372	67078168	FanC	rs12908498	15:67366488	2.939e-16	0.222733	0.909156
15	67070001 - 67080000	67250001 - 67260000	rs10518707	67073284	FanC	rs12908498	15:67366488	1.474e-15	0.0424531	0.996013
15	67070001 - 67080000	67250001 - 67260000	rs7177795	67074495	FanC	rs12908498	15:67366488	1.736e-15	0.0389403	0.996013
15	67070001 - 67080000	67250001 - 67260000	rs7178381	67074846	FanC	rs12908498	15:67366488	1.643e-15	0.0424531	0.996013
15	67070001 - 67080000	67250001 - 67260000	rs1498506	67075296	FanC	rs12908498	15:67366488	1.48e-15	0.0462884	0.996013
15	67070001 - 67080000	67250001 - 67260000	rs1498507	67075368	FanC	rs12908498	15:67366488	1.463e-15	0.0462884	0.996013
15	67070001 - 67080000	67250001 - 67260000	rs28613758	67076321	FanC	rs12908498	15:67366488	8.263e-16	0.0850826	1
15	67070001 - 67080000	67250001 - 67260000	rs12908498	67074150	FanC	rs12908498	15:67366488	1.85e-16	0.361447	1
15	98634035 - 98660965	98839035 - 98865965	rs12917566	98637015	FanC	rs12914479	15:99174828	3.483e-08	0.086762	0.890965
9	4285001 - 4305000	4485001 - 4505000	rs10974438	4291928	FanC	rs10974438	9:4291928	7.39e-11	0.728404	1
9	4285001 - 4305000	4485001 - 4505000	rs10814915	4290544	FanC	rs10974438	9:4291928	8.129e-10	0.0556886	0.648054
9	4285001 - 4305000	4485001 - 4505000	rs12350099	4298576	FanC	rs10974438	9:4291928	2.075e-09	0.0346145	0.104184
9	4285001 - 4305000	4485001 - 4505000	rs10758594	4295583	FanC	rs10974438	9:4291928	1.108e-09	0.0457541	0.639226
1	219566257 - 219603743	219786257 - 219823743	rs2820444	219568478	FanC	rs2605100	1:219644224	1.345e-14	0.0475909	0.449583
12	108216257 - 108253743	108436257 - 108473743	rs3764002	108224853	FanC	rs1426371	12:108629780	8.901e-10	0.439237	0.938393
12	108216257 - 108253743	108436257 - 108473743	rs1426371	108236003	FanC	rs1426371	12:108629780	8.855e-10	0.47357	1
7	129198820 - 129231180	129458820 - 129491180	rs143083812	129203569	FanC	rs143083812	7:128843410	1.113e-11	0.896396	1
10	72030001 - 72060000	72320001 - 72350000	rs1245532	72031016	FanC	rs3740129	10:73767859	2.191e-11	0.0820496	0.75457
10	72030001 - 72060000	72320001 - 72350000	rs1245533	72030368	FanC	rs3740129	10:73767859	5.185e-11	0.0352075	0.77951
12	93761800 - 93808200	94071800 - 94118200	rs2171126	93773444	FanC	rs7953280	12:94136009	6.062e-12	0.0492308	0.788134
9	107632547 - 107657453	107922547 - 107947453	rs7875152	107642502	FanC	rs79895530	9:110416422	1.377e-13	0.0448873	0.894928
9	107632547 - 107657453	107922547 - 107947453	rs79895530	107654141	FanC	rs79895530	9:110416422	3.859e-14	0.136786	1
15	62769693 - 62795307	63079693 - 63105307	rs74852393	62775235	FanC	rs74852393	15:63067433	8.192e-12	0.999933	1
15	62772547 - 62797453	63082547 - 63107453	rs74852393	62775235	FanC	rs74852393	15:63067433	8.192e-12	0.999933	1
12	123254230 - 123280770	123574230 - 123600770	rs63406760	123258146	FanC	rs753350451	12:123732769	3.507e-10	0.0715982	-
1	227704349 - 227765651	228074349 - 228135651	rs11588850	227739541	FanC	rs11588850	1:227927242	3.528e-10	0.391126	1
3	188575001 - 188595000	188945001 - 188965000	rs758236099	188579521	FanC	rs747952496	3:188311659	6.88415e-10	0.0608397	-
3	188575001 - 188595000	188945001 - 188965000	rs747952496	188593871	FanC	rs747952496	3:188311659	9.59119e-11	0.0718625	1
9	95495001 - 95515000	95865001 - 95885000	rs28427480	95502660	FanC	rs76340814	9:98321412	7.474e-09	0.0354521	0.260626
9	95495001 - 95515000	95865001 - 95885000	rs16909922	95503619	FanC	rs76340814	9:98321412	8.58e-09	0.0313744	0.260626
9	95495001 - 95515000	95865001 - 95885000	rs60150206	95499941	FanC	rs76340814	9:98321412	8.819e-09	0.0303531	0.263903
9	95495001 - 95515000	95865001 - 95885000	rs60417486	95499896	FanC	rs76340814	9:98321412	7.871e-09	0.0342035	0.263903
9	4282547 - 4307453	4662547 - 4687453	rs10974438	4291928	FanC	rs10974438	9:4291928	7.39e-11	0.728404	1
9	4282547 - 4307453	4662547 - 4687453	rs10814915	4290544	FanC	rs10974438	9:4291928	8.129e-10	0.0556886	0.648054
9	4282547 - 4307453	4662547 - 4687453	rs12350099	4298576	FanC	rs10974438	9:4291928	2.075e-09	0.0346145	0.104184
9	4282547 - 4307453	4662547 - 4687453	rs3892354	4282942	FanC	rs10974438	9:4291928	1.361e-09	0.0457541	0.61763
9	4282547 - 4307453	4662547 - 4687453	rs10758594	4295583	FanC	rs10974438	9:4291928	1.108e-09	0.0457541	0.639226
5	171367120 - 171462880	171857120 - 171952880	rs4073716	171437235	FanC	rs3884606	5:170871074	5.474e-09	0.0913655	0.799248
5	171367120 - 171462880	171857120 - 171952880	rs4074237	171436649	FanC	rs3884606	5:170871074	3.251e-09	0.147847	0.781344
5	171367120 - 171462880	171857120 - 171952880	rs4076077	171436505	FanC	rs3884606	5:170871074	3.275e-09	0.147847	0.781344
5	171367120 - 171462880	171857120 - 171952880	rs3884606	171444070	FanC	rs3884606	5:170871074	8.956e-10	0.533249	1
9	95492929 - 95517071	96032929 - 96057071	rs28427480	95502660	FanC	rs76340814	9:98321412	7.474e-09	0.0354521	0.260626
9	95492929 - 95517071	96032929 - 96057071	rs10512249	95494027	FanC	rs76340814	9:98321412	8.874e-09	0.0335181	0.267248
9	95492929 - 95517071	96032929 - 96057071	rs16909922	95503619	FanC	rs76340814	9:98321412	8.58e-09	0.0313744	0.260626
9	95492929 - 95517071	96032929 - 96057071	rs60150206	95499941	FanC	rs76340814	9:98321412	8.819e-09	0.0303531	0.263903
9	95492929 - 95517071	96032929 - 96057071	rs60417486	95499896	FanC	rs76340814	9:98321412	7.871e-09	0.0342035	0.263903
1	184047273 - 184102727	184637273 - 184692727	rs2274432	184051811	FanC	rs1327123	1:184014593	5.31371e-15	0.0465966	0.981979
1	184047273 - 184102727	184637273 - 184692727	rs10797937	184047997	FanC	rs1327123	1:184014593	5.07786e-15	0.048696	0.99549
1	184047273 - 184102727	184637273 - 184692727	rs10797938	184050820	FanC	rs1327123	1:184014593	5.33043e-15	0.0464534	0.99549
1	184047273 - 184102727	184637273 - 184692727	rs1046934	184054395	FanC	rs1327123	1:184014593	2.19562e-15	0.110914	0.981979
1	184047273 - 184102727	184637273 - 184692727	rs1926872	184049341	FanC	rs1327123	1:184014593	5.45778e-15	0.0453654	0.99549
1	184047273 - 184102727	184637273 - 184692727	rs1952256	184065982	FanC	rs1327123	1:184014593	2.10664e-15	0.115507	0.981979
1	184056209 - 184098791	184641209 - 184683791	rs1952256	184065982	FanC	rs1327123	1:184014593	2.10664e-15	0.115507	0.981979
9	4290001 - 4300000	4900001 - 4910000	rs10974438	4291928	FanC	rs10974438	9:4291928	7.39e-11	0.728404	1
9	4290001 - 4300000	4900001 - 4910000	rs10814915	4290544	FanC	rs10974438	9:4291928	8.129e-10	0.0556886	0.648054
9	4290001 - 4300000	4900001 - 4910000	rs12350099	4298576	FanC	rs10974438	9:4291928	2.075e-09	0.0346145	0.104184
9	4290001 - 4300000	4900001 - 4910000	rs10758594	4295583	FanC	rs10974438	9:4291928	1.108e-09	0.0457541	0.639226
9	95502501 - 95512500	96212501 - 96222500	rs28427480	95502660	FanC	rs76340814	9:98321412	7.474e-09	0.0354521	0.260626
9	95502501 - 95512500	96212501 - 96222500	rs16909922	95503619	FanC	rs76340814	9:98321412	8.58e-09	0.0313744	0.260626
9	115579693 - 115610307	116559693 - 116590307	rs1400900375	115580746	FanC	rs1400900375	9:118343026	4.39537e-11	0.318598	1
9	115579693 - 115610307	116559693 - 116590307	rs11451416	115580868	FanC	rs1400900375	9:118343026	2.25006e-10	0.0710285	-
9	115579693 - 115610307	116559693 - 116590307	rs10739455	115580751	FanC	rs1400900375	9:118343026	5.76817e-11	0.244387	-
19	45865001 - 45885000	46845001 - 46865000	rs11550348	45884086	FanC	rs8112559	19:46390455	9.071e-11	0.279626	1
6	44640001 - 44670000	45700001 - 45730000	rs1767790	44665841	FanC	rs17288390	6:45384018	2.221e-12	0.0443013	0.143514
9	115568215 - 115601785	116648215 - 116681785	rs1400900375	115580746	FanC	rs1400900375	9:118343026	4.39537e-11	0.318598	1
9	115568215 - 115601785	116648215 - 116681785	rs11451416	115580868	FanC	rs1400900375	9:118343026	2.25006e-10	0.0710285	-
9	115568215 - 115601785	116648215 - 116681785	rs10739455	115580751	FanC	rs1400900375	9:118343026	5.76817e-11	0.244387	-
6	44642547 - 44667453	45912547 - 45937453	rs1767790	44665841	FanC	rs17288390	6:45384018	2.221e-12	0.0443013	0.143514
9	126949225 - 126995775	126999225 - 127045775	rs755318	127017016	FanC	rs10465114	9:129917824	1.64861e-08	0.0408748	0.959359
16	69727158 - 69862842	69867158 - 70002842	rs34195470	69921787	FanC	rs34195470	16:69955690	3.128e-13	0.445223	1
9	126942323 - 126987677	126992323 - 127037677	rs755318	127017016	FanC	rs10465114	9:129917824	1.64861e-08	0.0408748	0.959359
12	123058148 - 123111852	123118148 - 123171852	rs1619561	123135721	FanC	rs753350451	12:123732769	5.689e-10	0.0573529	-
12	123058148 - 123111852	123118148 - 123171852	rs5801505	123163593	FanC	rs753350451	12:123732769	7.926e-10	0.0345384	-
6	26034380 - 26075620	26084380 - 26125620	rs1800562	26092913	FanC	rs79220007	6:26098474	2.923e-09	0.211815	1
6	26034380 - 26075620	26084380 - 26125620	rs79220007	26098246	FanC	rs79220007	6:26098474	2.215e-09	0.295805	1
6	26034380 - 26075620	26084380 - 26125620	rs115740542	26123274	FanC	rs79220007	6:26098474	7.702e-09	0.0943302	0.976258
17	69440663 - 69474337	69485663 - 69519337	rs2716212	69507512	FanC	rs2716212	17:67503653	3.56e-10	0.312127	1
17	69440663 - 69474337	69485663 - 69519337	rs2521348	69503576	FanC	rs2716212	17:67503653	4.559e-10	0.223428	0.983447
17	69440663 - 69474337	69485663 - 69519337	rs2521349	69507360	FanC	rs2716212	17:67503653	3.637e-10	0.295152	1
9	114090674 - 114124326	114135674 - 114169326	rs72760655	114153934	FanC	rs72760655	9:116916214	1.15816e-12	0.309825	1
9	114090674 - 114124326	114135674 - 114169326	rs737142	114167047	FanC	rs72760655	9:116916214	2.36827e-12	0.15144	0.916502
7	129144486 - 129180514	129194486 - 129230514	rs143083812	129203569	FanC	rs143083812	7:128843410	1.113e-11	0.896396	1
11	67247253 - 67282747	67297253 - 67332747	rs34695471	67308593	FanC	rs34560402	11:66872320	4.462e-10	0.247215	0.942663
11	67247253 - 67282747	67297253 - 67332747	rs76335321	67330307	FanC	rs34560402	11:66872320	1.331e-09	0.0840489	0.756636
6	18317253 - 18352747	18367253 - 18402747	rs1886248	18399163	FanC	rs9396861	6:18404133	1.978e-10	0.299687	0.618163
9	33799863 - 33825137	33839863 - 33865137	rs56270678	33841829	FanC	rs10453201	9:34050345	2.07e-08	0.0417617	0.989106
19	10562751 - 10607249	10622751 - 10667249	rs1975163	10645723	FanC	rs10405617	19:10752968	1.15438e-10	0.0568143	1
19	10562751 - 10607249	10622751 - 10667249	rs7248558	10659616	FanC	rs10405617	19:10752968	1.97086e-10	0.0336972	0.991524
19	10562751 - 10607249	10622751 - 10667249	rs4435370	10663947	FanC	rs10405617	19:10752968	1.72525e-10	0.0383704	0.991524
19	10562751 - 10607249	10622751 - 10667249	rs2163832	10635088	FanC	rs10405617	19:10752968	1.72231e-10	0.0384354	-
19	10562751 - 10607249	10622751 - 10667249	rs2360944	10659298	FanC	rs10405617	19:10752968	1.9756e-10	0.0336185	0.991524
19	10562751 - 10607249	10622751 - 10667249	rs3843750	10637397	FanC	rs10405617	19:10752968	1.5094e-10	0.0437213	0.995755
19	10562751 - 10607249	10622751 - 10667249	rs3843751	10637445	FanC	rs10405617	19:10752968	1.51247e-10	0.0436357	1
19	10562751 - 10607249	10622751 - 10667249	rs10417412	10656122	FanC	rs10405617	19:10752968	1.72526e-10	0.0383704	0.991524
19	10562751 - 10607249	10622751 - 10667249	rs10405617	10642292	FanC	rs10405617	19:10752968	1.15422e-10	0.0568171	1
19	10562751 - 10607249	10622751 - 10667249	rs10408721	10647643	FanC	rs10405617	19:10752968	1.77905e-10	0.0372387	0.945915
19	10562751 - 10607249	10622751 - 10667249	rs10948	10644229	FanC	rs10405617	19:10752968	2.00591e-10	0.0331206	1
19	10562751 - 10607249	10622751 - 10667249	rs34046714	10664334	FanC	rs10405617	19:10752968	1.5096e-10	0.0437155	0.991524
3	11482798 - 11547202	11562798 - 11627202	rs2117870	11600803	FanC	rs2276749	3:11643465	5.162e-09	0.0499327	0.977704
3	11482798 - 11547202	11562798 - 11627202	rs2276749	11601991	FanC	rs2276749	3:11643465	3.34e-09	0.0774542	1
3	11482798 - 11547202	11562798 - 11627202	rs6786146	11604241	FanC	rs2276749	3:11643465	4.103e-09	0.0585811	0.977704
3	11482798 - 11547202	11562798 - 11627202	rs6799718	11600785	FanC	rs2276749	3:11643465	4.094e-09	0.0627464	-
3	11482798 - 11547202	11562798 - 11627202	rs6810015	11604111	FanC	rs2276749	3:11643465	4.793e-09	0.0534658	0.977704
3	11482798 - 11547202	11562798 - 11627202	rs12633581	11601220	FanC	rs2276749	3:11643465	4.128e-09	0.0613251	0.977704
11	76723581 - 76761419	76778581 - 76816419	rs1149611	76784835	FanC	rs1149620	11:76506572	1.294e-08	0.0445955	0.939665
11	76723581 - 76761419	76778581 - 76816419	rs1149613	76786388	FanC	rs1149620	11:76506572	4.467e-09	0.172344	0.864359
11	76723581 - 76761419	76778581 - 76816419	rs1149620	76795528	FanC	rs1149620	11:76506572	2.865e-09	0.22734	1
11	76723581 - 76761419	76778581 - 76816419	rs4309181	76790661	FanC	rs1149620	11:76506572	2.039e-08	0.0341019	0.425262
11	76723581 - 76761419	76778581 - 76816419	rs10793195	76793688	FanC	rs1149620	11:76506572	1.826e-08	0.0457856	0.435281
11	76723581 - 76761419	76778581 - 76816419	rs11236936	76789786	FanC	rs1149620	11:76506572	1.861e-08	0.0366989	0.420313
11	76723581 - 76761419	76778581 - 76816419	rs10899281	76790813	FanC	rs1149620	11:76506572	1.872e-08	0.0395006	0.425262
11	76723581 - 76761419	76778581 - 76816419	rs10899282	76793654	FanC	rs1149620	11:76506572	2.657e-08	0.0316941	0.432961
11	76723581 - 76761419	76778581 - 76816419	rs10899283	76794158	FanC	rs1149620	11:76506572	1.145e-08	0.071599	0.422944
16	69839225 - 69885775	69904225 - 69950775	rs34195470	69921787	FanC	rs34195470	16:69955690	3.128e-13	0.445223	1
12	123080282 - 123104718	123125282 - 123149718	rs1619561	123135721	FanC	rs753350451	12:123732769	5.689e-10	0.0573529	-
11	67253104 - 67281896	67303104 - 67331896	rs34695471	67308593	FanC	rs34560402	11:66872320	4.462e-10	0.247215	0.942663
11	67253104 - 67281896	67303104 - 67331896	rs76335321	67330307	FanC	rs34560402	11:66872320	1.331e-09	0.0840489	0.756636
11	76715748 - 76754252	76775748 - 76814252	rs1149611	76784835	FanC	rs1149620	11:76506572	1.294e-08	0.0445955	0.939665
11	76715748 - 76754252	76775748 - 76814252	rs1149613	76786388	FanC	rs1149620	11:76506572	4.467e-09	0.172344	0.864359
11	76715748 - 76754252	76775748 - 76814252	rs1149620	76795528	FanC	rs1149620	11:76506572	2.865e-09	0.22734	1
11	76715748 - 76754252	76775748 - 76814252	rs4309181	76790661	FanC	rs1149620	11:76506572	2.039e-08	0.0341019	0.425262
11	76715748 - 76754252	76775748 - 76814252	rs10793195	76793688	FanC	rs1149620	11:76506572	1.826e-08	0.0457856	0.435281
11	76715748 - 76754252	76775748 - 76814252	rs11236936	76789786	FanC	rs1149620	11:76506572	1.861e-08	0.0366989	0.420313
11	76715748 - 76754252	76775748 - 76814252	rs10899281	76790813	FanC	rs1149620	11:76506572	1.872e-08	0.0395006	0.425262
11	76715748 - 76754252	76775748 - 76814252	rs10899282	76793654	FanC	rs1149620	11:76506572	2.657e-08	0.0316941	0.432961
11	76715748 - 76754252	76775748 - 76814252	rs10899283	76794158	FanC	rs1149620	11:76506572	1.145e-08	0.071599	0.422944
10	71923249 - 71991751	72013249 - 72081751	rs1245518	72024267	FanC	rs3740129	10:73767859	3.988e-11	0.0453625	0.54564
10	71923249 - 71991751	72013249 - 72081751	rs1245523	72027139	FanC	rs3740129	10:73767859	4.695e-11	0.0396908	0.783881
10	71923249 - 71991751	72013249 - 72081751	rs1245524	72027844	FanC	rs3740129	10:73767859	5.46e-11	0.0339738	0.547903
10	71923249 - 71991751	72013249 - 72081751	rs1245532	72031016	FanC	rs3740129	10:73767859	2.191e-11	0.0820496	0.75457
10	71923249 - 71991751	72013249 - 72081751	rs1245533	72030368	FanC	rs3740129	10:73767859	5.185e-11	0.0352075	0.77951
10	71923249 - 71991751	72013249 - 72081751	rs1245535	72029275	FanC	rs3740129	10:73767859	2.543e-11	0.100375	0.54789
10	71923249 - 71991751	72013249 - 72081751	rs1271934	72028775	FanC	rs3740129	10:73767859	3.67e-11	0.0509514	0.545627
10	71920770 - 71989230	72010770 - 72079230	rs1245518	72024267	FanC	rs3740129	10:73767859	3.988e-11	0.0453625	0.54564
10	71920770 - 71989230	72010770 - 72079230	rs1245523	72027139	FanC	rs3740129	10:73767859	4.695e-11	0.0396908	0.783881
10	71920770 - 71989230	72010770 - 72079230	rs1245524	72027844	FanC	rs3740129	10:73767859	5.46e-11	0.0339738	0.547903
10	71920770 - 71989230	72010770 - 72079230	rs1245532	72031016	FanC	rs3740129	10:73767859	2.191e-11	0.0820496	0.75457
10	71920770 - 71989230	72010770 - 72079230	rs1245533	72030368	FanC	rs3740129	10:73767859	5.185e-11	0.0352075	0.77951
10	71920770 - 71989230	72010770 - 72079230	rs1245535	72029275	FanC	rs3740129	10:73767859	2.543e-11	0.100375	0.54789
10	71920770 - 71989230	72010770 - 72079230	rs1271934	72028775	FanC	rs3740129	10:73767859	3.67e-11	0.0509514	0.545627
19	10554330 - 10600670	10624330 - 10670670	rs1975163	10645723	FanC	rs10405617	19:10752968	1.15438e-10	0.0568143	1
19	10554330 - 10600670	10624330 - 10670670	rs7248558	10659616	FanC	rs10405617	19:10752968	1.97086e-10	0.0336972	0.991524
19	10554330 - 10600670	10624330 - 10670670	rs4435370	10663947	FanC	rs10405617	19:10752968	1.72525e-10	0.0383704	0.991524
19	10554330 - 10600670	10624330 - 10670670	rs2163832	10635088	FanC	rs10405617	19:10752968	1.72231e-10	0.0384354	-
19	10554330 - 10600670	10624330 - 10670670	rs2360942	10670126	FanC	rs10405617	19:10752968	1.72531e-10	0.0383704	0.991524
19	10554330 - 10600670	10624330 - 10670670	rs2360944	10659298	FanC	rs10405617	19:10752968	1.9756e-10	0.0336185	0.991524
19	10554330 - 10600670	10624330 - 10670670	rs3843750	10637397	FanC	rs10405617	19:10752968	1.5094e-10	0.0437213	0.995755
19	10554330 - 10600670	10624330 - 10670670	rs3843751	10637445	FanC	rs10405617	19:10752968	1.51247e-10	0.0436357	1
19	10554330 - 10600670	10624330 - 10670670	rs10417412	10656122	FanC	rs10405617	19:10752968	1.72526e-10	0.0383704	0.991524
19	10554330 - 10600670	10624330 - 10670670	rs8099926	10667971	FanC	rs10405617	19:10752968	1.50981e-10	0.0437098	0.991524
19	10554330 - 10600670	10624330 - 10670670	rs10405617	10642292	FanC	rs10405617	19:10752968	1.15422e-10	0.0568171	1
19	10554330 - 10600670	10624330 - 10670670	rs10408721	10647643	FanC	rs10405617	19:10752968	1.77905e-10	0.0372387	0.945915
19	10554330 - 10600670	10624330 - 10670670	rs10948	10644229	FanC	rs10405617	19:10752968	2.00591e-10	0.0331206	1
19	10554330 - 10600670	10624330 - 10670670	rs34046714	10664334	FanC	rs10405617	19:10752968	1.5096e-10	0.0437155	0.991524
15	57972501 - 58017500	58042501 - 58087500	rs4238326	58043802	FanC	rs11071366	15:58334244	8.94e-17	0.150626	0.986996
15	57972501 - 58017500	58042501 - 58087500	rs4646576	58046800	FanC	rs11071366	15:58334244	1.015e-16	0.150626	0.986996
15	57972501 - 58017500	58042501 - 58087500	rs35246600	58044228	FanC	rs11071366	15:58334244	9.032e-17	0.161059	0.986996
14	94322547 - 94347453	94372547 - 94397453	rs28929474	94378610	FanC	rs28929474	14:94844947	1.064e-10	0.503172	1
7	129152547 - 129177453	129202547 - 129227453	rs143083812	129203569	FanC	rs143083812	7:128843410	1.113e-11	0.896396	1
6	35307736 - 35382264	35407736 - 35482264	rs3734254	35427233	FanC	rs2038740	6:35114542	5.859e-09	0.0464032	0.422415
9	4226456 - 4248544	4276456 - 4298544	rs10974438	4291928	FanC	rs10974438	9:4291928	7.39e-11	0.728404	1
9	4226456 - 4248544	4276456 - 4298544	rs10814915	4290544	FanC	rs10974438	9:4291928	8.129e-10	0.0556886	0.648054
9	4226456 - 4248544	4276456 - 4298544	rs3892354	4282942	FanC	rs10974438	9:4291928	1.361e-09	0.0457541	0.61763
9	4226456 - 4248544	4276456 - 4298544	rs10758594	4295583	FanC	rs10974438	9:4291928	1.108e-09	0.0457541	0.639226
17	56718991 - 56736009	56768991 - 56786009	rs12602666	56773392	FanC	rs9908159	17:54841961	4.25894e-10	0.14452	1
17	56718991 - 56736009	56768991 - 56786009	rs8073455	56771863	FanC	rs9908159	17:54841961	6.00031e-10	0.103452	1
21	38589410 - 38605590	38639410 - 38655590	rs9981408	38645522	FanC	rs9981408	21:40017446	1.81986e-12	0.402279	1
21	38589410 - 38605590	38639410 - 38655590	rs9976018	38647205	FanC	rs9981408	21:40017446	4.67498e-12	0.16003	0.987822
21	38589410 - 38605590	38639410 - 38655590	rs9976458	38647549	FanC	rs9981408	21:40017446	5.15529e-12	0.147299	0.969705
21	38589410 - 38605590	38639410 - 38655590	rs62217511	38641642	FanC	rs9981408	21:40017446	8.48148e-12	0.0894616	0.945692
21	38589410 - 38605590	38639410 - 38655590	rs76622165	38640743	FanC	rs9981408	21:40017446	1.09707e-11	0.0717813	0.90939
1	118145001 - 118160000	118195001 - 118210000	rs12074373	118202297	FanC	rs4411121	1:118757034	4.067e-11	0.161806	0.911699
9	115032547 - 115057453	115092547 - 115117453	rs1929395	115094633	FanC	rs1330349	9:117840742	1.37767e-18	0.105999	0.890776
5	142349410 - 142365590	142409410 - 142425590	rs10062749	142425523	FanC	rs10062749	5:141805088	2.041e-09	0.368769	1
5	142349410 - 142365590	142409410 - 142425590	rs10076308	142425104	FanC	rs10062749	5:141805088	2.354e-09	0.337862	1
7	129212547 - 129237453	129282547 - 129307453	rs560613515	129293284	FanC	rs143083812	7:128843410	9.641e-10	0.076928	-
19	41177578 - 41232422	41277578 - 41332422	rs75621460	41327879	FanC	rs75621460	19:41833784	2.721e-10	0.99968	1
6	33005001 - 33025000	33075001 - 33095000	rs3130169	33080325	FanC	rs2856821	6:33046742	2.337e-08	0.0347915	0.427617
6	33005001 - 33025000	33075001 - 33095000	rs2856821	33078965	FanC	rs2856821	6:33046742	5.706e-09	0.106917	1
6	33005001 - 33025000	33075001 - 33095000	rs9277369	33082367	FanC	rs2856821	6:33046742	2.146e-08	0.0374901	0.683399
6	33005001 - 33025000	33075001 - 33095000	rs9277552	33087724	FanC	rs2856821	6:33046742	7.141e-09	0.0946852	0.906933
6	33005001 - 33025000	33075001 - 33095000	rs1042136	33080851	FanC	rs2856821	6:33046742	1.462e-08	0.0488581	0.715496
9	127055001 - 127060000	127110001 - 127115000	rs10819267	127110445	FanC	rs10465114	9:129917824	1.38608e-08	0.0483538	0.965336
9	127055001 - 127060000	127110001 - 127115000	rs10760476	127112976	FanC	rs10465114	9:129917824	1.55042e-08	0.0433798	0.965336
15	57946079 - 57988921	58046079 - 58088921	rs4646576	58046800	FanC	rs11071366	15:58334244	1.015e-16	0.150626	0.986996
17	69415001 - 69435000	69495001 - 69515000	rs2716212	69507512	FanC	rs2716212	17:67503653	3.56e-10	0.312127	1
17	69415001 - 69435000	69495001 - 69515000	rs2521348	69503576	FanC	rs2716212	17:67503653	4.559e-10	0.223428	0.983447
17	69415001 - 69435000	69495001 - 69515000	rs2521349	69507360	FanC	rs2716212	17:67503653	3.637e-10	0.295152	1
17	61378919 - 61451081	61518919 - 61591081	rs7212908	61577232	FanC	rs7212908	17:59654593	1.948e-11	0.320494	1
17	61378919 - 61451081	61518919 - 61591081	rs7221010	61574927	FanC	rs7212908	17:59654593	1.951e-11	0.257247	0.987209
17	61378919 - 61451081	61518919 - 61591081	rs7222178	61574921	FanC	rs7212908	17:59654593	1.795e-11	0.282963	0.987209
12	108034353 - 108095647	108164353 - 108225647	rs3764002	108224853	FanC	rs1426371	12:108629780	8.901e-10	0.439237	0.938393
5	142312929 - 142337071	142412929 - 142437071	rs6861056	142425850	FanC	rs10062749	5:141805088	2.61e-08	0.0323203	0.955095
5	142312929 - 142337071	142412929 - 142437071	rs10062749	142425523	FanC	rs10062749	5:141805088	2.041e-09	0.368769	1
5	142312929 - 142337071	142412929 - 142437071	rs10076308	142425104	FanC	rs10062749	5:141805088	2.354e-09	0.337862	1
5	142312929 - 142337071	142412929 - 142437071	rs28538668	142425735	FanC	rs10062749	5:141805088	2.383e-08	0.0350883	0.955095
15	98486699 - 98548301	98626699 - 98688301	rs11629600	98633348	FanC	rs12914479	15:99174828	1.035e-08	0.195256	0.981529
15	98486699 - 98548301	98626699 - 98688301	rs12901358	98630252	FanC	rs12914479	15:99174828	2.293e-08	0.109948	0.710995
15	98486699 - 98548301	98626699 - 98688301	rs12901681	98630448	FanC	rs12914479	15:99174828	2.093e-08	0.129258	0.928745
15	98486699 - 98548301	98626699 - 98688301	rs12917566	98637015	FanC	rs12914479	15:99174828	3.483e-08	0.086762	0.890965
15	98486699 - 98548301	98626699 - 98688301	rs12914479	98631599	FanC	rs12914479	15:99174828	7.117e-09	0.306609	1
3	188465001 - 188485000	188565001 - 188585000	rs758236099	188579521	FanC	rs747952496	3:188311659	6.88415e-10	0.0608397	-
5	68437501 - 68447500	68527501 - 68537500	rs1423232	68533051	FanC	rs56132153	5:67825133	6.716e-09	0.05442	0.971179
5	68437501 - 68447500	68527501 - 68537500	rs11750646	68529768	FanC	rs56132153	5:67825133	7.597e-09	0.0583678	0.891576
5	68437501 - 68447500	68527501 - 68537500	rs10940168	68527759	FanC	rs56132153	5:67825133	5.163e-09	0.0781968	1
5	68437501 - 68447500	68527501 - 68537500	rs10940169	68527855	FanC	rs56132153	5:67825133	1.188e-08	0.0388658	0.899294
5	68437501 - 68447500	68527501 - 68537500	rs10471339	68527946	FanC	rs56132153	5:67825133	9.498e-09	0.0475991	0.895429
5	68437501 - 68447500	68527501 - 68537500	rs6897355	68527789	FanC	rs56132153	5:67825133	5.117e-09	0.0781968	1
5	68437501 - 68447500	68527501 - 68537500	rs7704228	68530907	FanC	rs56132153	5:67825133	9.727e-09	0.0475991	0.891576
5	68437501 - 68447500	68527501 - 68537500	rs34485661	68532398	FanC	rs56132153	5:67825133	9.88e-09	0.0380206	0.983312
5	68437501 - 68447500	68527501 - 68537500	rs28562175	68531629	FanC	rs56132153	5:67825133	8.81e-09	0.0397168	0.891576
5	68437501 - 68447500	68527501 - 68537500	rs56132153	68529306	FanC	rs56132153	5:67825133	3.799e-09	0.107023	1
20	35278079 - 35331921	35418079 - 35471921	rs143384	35437976	FanC	rs143384	20:34025756	1.012e-23	0.940538	1
15	98489573 - 98540427	98629573 - 98680427	rs11629600	98633348	FanC	rs12914479	15:99174828	1.035e-08	0.195256	0.981529
15	98489573 - 98540427	98629573 - 98680427	rs12901358	98630252	FanC	rs12914479	15:99174828	2.293e-08	0.109948	0.710995
15	98489573 - 98540427	98629573 - 98680427	rs12901681	98630448	FanC	rs12914479	15:99174828	2.093e-08	0.129258	0.928745
15	98489573 - 98540427	98629573 - 98680427	rs12917566	98637015	FanC	rs12914479	15:99174828	3.483e-08	0.086762	0.890965
15	98489573 - 98540427	98629573 - 98680427	rs12914479	98631599	FanC	rs12914479	15:99174828	7.117e-09	0.306609	1
4	144575001 - 144595000	144685001 - 144705000	rs75686861	144700176	FanC	rs75686861	4:145621328	3.039e-09	0.600413	1
17	61388427 - 61436573	61528427 - 61576573	rs7221010	61574927	FanC	rs7212908	17:59654593	1.951e-11	0.257247	0.987209
17	61388427 - 61436573	61528427 - 61576573	rs7222178	61574921	FanC	rs7212908	17:59654593	1.795e-11	0.282963	0.987209
16	69777353 - 69817647	69912353 - 69952647	rs34195470	69921787	FanC	rs34195470	16:69955690	3.128e-13	0.445223	1
20	35278382 - 35326618	35423382 - 35471618	rs143384	35437976	FanC	rs143384	20:34025756	1.012e-23	0.940538	1
2	105920001 - 105950000	106050001 - 106080000	rs13014521	106071000	FanC	rs66989638	2:106689736	3.287e-10	0.108067	0.973046
2	105920001 - 105950000	106050001 - 106080000	rs66989638	106073280	FanC	rs66989638	2:106689736	3.311e-11	0.891765	1
9	107475748 - 107514252	107615748 - 107654252	rs7875152	107642502	FanC	rs79895530	9:110416422	1.377e-13	0.0448873	0.894928
9	107475748 - 107514252	107615748 - 107654252	rs79895530	107654141	FanC	rs79895530	9:110416422	3.859e-14	0.136786	1
6	18255001 - 18275000	18385001 - 18405000	rs1886248	18399163	FanC	rs9396861	6:18404133	1.978e-10	0.299687	0.618163
6	18255001 - 18275000	18385001 - 18405000	rs9396861	18403902	FanC	rs9396861	6:18404133	9.347e-11	0.677236	1
6	34965001 - 35005000	35115001 - 35155000	rs2038740	35146765	FanC	rs2038740	6:35114542	6.195e-10	0.337959	1
6	34965001 - 35005000	35115001 - 35155000	rs9394274	35147134	FanC	rs2038740	6:35114542	6.201e-10	0.337959	1
9	107478666 - 107506334	107623666 - 107651334	rs7875152	107642502	FanC	rs79895530	9:110416422	1.377e-13	0.0448873	0.894928
6	34972329 - 35002671	35122329 - 35152671	rs2038740	35146765	FanC	rs2038740	6:35114542	6.195e-10	0.337959	1
6	34972329 - 35002671	35122329 - 35152671	rs9394274	35147134	FanC	rs2038740	6:35114542	6.201e-10	0.337959	1
9	4135001 - 4155000	4285001 - 4305000	rs10974438	4291928	FanC	rs10974438	9:4291928	7.39e-11	0.728404	1
9	4135001 - 4155000	4285001 - 4305000	rs10814915	4290544	FanC	rs10974438	9:4291928	8.129e-10	0.0556886	0.648054
9	4135001 - 4155000	4285001 - 4305000	rs12350099	4298576	FanC	rs10974438	9:4291928	2.075e-09	0.0346145	0.104184
9	4135001 - 4155000	4285001 - 4305000	rs10758594	4295583	FanC	rs10974438	9:4291928	1.108e-09	0.0457541	0.639226
9	116373313 - 116411687	116543313 - 116581687	rs1407243	116552572	FanC	rs1321917	9:119324929	3.14866e-18	0.12046	1
9	116373313 - 116411687	116543313 - 116581687	rs1321917	116562650	FanC	rs1321917	9:119324929	2.45628e-18	0.153842	1
9	116373313 - 116411687	116543313 - 116581687	rs11787627	116578758	FanC	rs1321917	9:119324929	5.76407e-18	0.0664105	0.940583
9	116373313 - 116411687	116543313 - 116581687	rs10759849	116565910	FanC	rs1321917	9:119324929	5.55357e-18	0.0688933	0.940583
9	116373313 - 116411687	116543313 - 116581687	rs10759850	116576204	FanC	rs1321917	9:119324929	5.82384e-18	0.0657441	0.940583
9	116373313 - 116411687	116543313 - 116581687	rs1895062	116551207	FanC	rs1321917	9:119324929	1.76179e-18	0.213395	0.9919
17	69310823 - 69359177	69490823 - 69539177	rs2716212	69507512	FanC	rs2716212	17:67503653	3.56e-10	0.312127	1
17	69310823 - 69359177	69490823 - 69539177	rs2521348	69503576	FanC	rs2716212	17:67503653	4.559e-10	0.223428	0.983447
17	69310823 - 69359177	69490823 - 69539177	rs2521349	69507360	FanC	rs2716212	17:67503653	3.637e-10	0.295152	1
12	93560001 - 93590000	93730001 - 93760000	rs4144499	93758068	FanC	rs7953280	12:94136009	5.976e-12	0.0492308	0.867345
12	93560001 - 93590000	93730001 - 93760000	rs4144503	93747996	FanC	rs7953280	12:94136009	1.084e-11	0.0317367	0.777539
12	93560001 - 93590000	93730001 - 93760000	rs7953280	93742233	FanC	rs7953280	12:94136009	4.835e-12	0.0772942	1
12	93560001 - 93590000	93730001 - 93760000	rs10161389	93747483	FanC	rs7953280	12:94136009	9.11e-12	0.0393534	0.874943
17	2032001 - 2077999	2222001 - 2267999	rs216175	2264396	FanC	rs216175	17:2167690	2.737e-12	0.693888	1
12	123022323 - 123067677	123212323 - 123257677	rs1790132	123213972	FanC	rs753350451	12:123732769	4.49e-10	0.0676543	-
12	123022323 - 123067677	123212323 - 123257677	rs1790133	123213971	FanC	rs753350451	12:123732769	4.49e-10	0.0676543	-
12	123022323 - 123067677	123212323 - 123257677	rs78788984	123246508	FanC	rs753350451	12:123732769	3.671e-10	0.0715982	-
12	123022323 - 123067677	123212323 - 123257677	rs753350451	123248222	FanC	rs753350451	12:123732769	3.359e-10	0.0790533	1
12	93560001 - 93585000	93730001 - 93755000	rs4144503	93747996	FanC	rs7953280	12:94136009	1.084e-11	0.0317367	0.777539
12	93560001 - 93585000	93730001 - 93755000	rs7953280	93742233	FanC	rs7953280	12:94136009	4.835e-12	0.0772942	1
12	93560001 - 93585000	93730001 - 93755000	rs10161389	93747483	FanC	rs7953280	12:94136009	9.11e-12	0.0393534	0.874943
6	44462959 - 44492041	44637959 - 44667041	rs1767790	44665841	FanC	rs17288390	6:45384018	2.221e-12	0.0443013	0.143514
5	142245001 - 142265000	142415001 - 142435000	rs6861056	142425850	FanC	rs10062749	5:141805088	2.61e-08	0.0323203	0.955095
5	142245001 - 142265000	142415001 - 142435000	rs10062749	142425523	FanC	rs10062749	5:141805088	2.041e-09	0.368769	1
5	142245001 - 142265000	142415001 - 142435000	rs10076308	142425104	FanC	rs10062749	5:141805088	2.354e-09	0.337862	1
5	142245001 - 142265000	142415001 - 142435000	rs28538668	142425735	FanC	rs10062749	5:141805088	2.383e-08	0.0350883	0.955095
17	56581667 - 56603333	56771667 - 56793333	rs12602666	56773392	FanC	rs9908159	17:54841961	4.25894e-10	0.14452	1
17	56581667 - 56603333	56771667 - 56793333	rs8073455	56771863	FanC	rs9908159	17:54841961	6.00031e-10	0.103452	1
9	33793334 - 33836666	34023334 - 34066666	rs10453201	34050347	FanC	rs10453201	9:34050345	1.05e-08	0.0808793	1
9	33793334 - 33836666	34023334 - 34066666	rs12164256	34023432	FanC	rs10453201	9:34050345	1.32e-08	0.0647824	0.98366
9	126919036 - 126970964	127169036 - 127220964	rs2095140	127178778	FanC	rs10465114	9:129917824	1.5029e-08	0.0450728	1
9	126919036 - 126970964	127169036 - 127220964	rs10819270	127172759	FanC	rs10465114	9:129917824	1.18677e-08	0.0566606	0.99419
9	126919036 - 126970964	127169036 - 127220964	rs3780325	127184894	FanC	rs10465114	9:129917824	1.28768e-08	0.0523523	0.994171
1	183626823 - 183683177	183886823 - 183943177	rs11583641	183937111	FanC	rs10797923	1:183901966	1.32943e-07	0.0633085	0.809227
1	183626823 - 183683177	183886823 - 183943177	rs730601	183942468	FanC	rs10797923	1:183901966	1.43958e-07	0.0580486	0.838766
1	183626823 - 183683177	183886823 - 183943177	rs7522001	183929656	FanC	rs10797923	1:183901966	1.94708e-07	0.0420661	0.976771
1	183626823 - 183683177	183886823 - 183943177	rs10797923	183932832	FanC	rs10797923	1:183901966	7.67417e-08	0.104446	1
1	183626823 - 183683177	183886823 - 183943177	rs10911472	183939679	FanC	rs10797923	1:183901966	8.8565e-08	0.0937217	0.814266
12	122965001 - 123005000	123215001 - 123255000	rs78788984	123246508	FanC	rs753350451	12:123732769	3.671e-10	0.0715982	-
12	122965001 - 123005000	123215001 - 123255000	rs753350451	123248222	FanC	rs753350451	12:123732769	3.359e-10	0.0790533	1
1	183637625 - 183677375	183892625 - 183932375	rs7522001	183929656	FanC	rs10797923	1:183901966	1.94708e-07	0.0420661	0.976771
12	124028755 - 124081245	124298755 - 124351245	rs1809889	124316680	FanC	rs1809889	12:124801226	5.701e-14	0.805357	1
12	124028755 - 124081245	124298755 - 124351245	rs4765540	124315096	FanC	rs1809889	12:124801226	4.527e-13	0.116118	0.824935
12	124028755 - 124081245	124298755 - 124351245	rs10846653	124313540	FanC	rs1809889	12:124801226	7.453e-13	0.0754108	0.627517
4	144445001 - 144465000	144685001 - 144705000	rs75686861	144700176	FanC	rs75686861	4:145621328	3.039e-09	0.600413	1
7	101845001 - 101865000	102115001 - 102135000	rs116934101	102132317	FanC	rs116934101	7:101775597	7.116e-09	0.100558	1
9	4030001 - 4040000	4290001 - 4300000	rs10974438	4291928	FanC	rs10974438	9:4291928	7.39e-11	0.728404	1
9	4030001 - 4040000	4290001 - 4300000	rs10814915	4290544	FanC	rs10974438	9:4291928	8.129e-10	0.0556886	0.648054
9	4030001 - 4040000	4290001 - 4300000	rs12350099	4298576	FanC	rs10974438	9:4291928	2.075e-09	0.0346145	0.104184
9	4030001 - 4040000	4290001 - 4300000	rs10758594	4295583	FanC	rs10974438	9:4291928	1.108e-09	0.0457541	0.639226
12	124021509 - 124053491	124306509 - 124338491	rs1809889	124316680	FanC	rs1809889	12:124801226	5.701e-14	0.805357	1
12	124021509 - 124053491	124306509 - 124338491	rs4765540	124315096	FanC	rs1809889	12:124801226	4.527e-13	0.116118	0.824935
12	124021509 - 124053491	124306509 - 124338491	rs10846653	124313540	FanC	rs1809889	12:124801226	7.453e-13	0.0754108	0.627517
5	128197351 - 128232649	128487351 - 128522649	rs13155917	128520801	FanC	rs17615906	5:128018413	1.59e-10	0.0323615	0.458928
5	128197351 - 128232649	128487351 - 128522649	rs17677555	128516919	FanC	rs17615906	5:128018413	9.961e-11	0.0587191	0.465704
3	188239120 - 188290880	188549120 - 188600880	rs758236099	188579521	FanC	rs747952496	3:188311659	6.88415e-10	0.0608397	-
3	188239120 - 188290880	188549120 - 188600880	rs747952496	188593871	FanC	rs747952496	3:188311659	9.59119e-11	0.0718625	1
3	188248722 - 188286278	188558722 - 188596278	rs758236099	188579521	FanC	rs747952496	3:188311659	6.88415e-10	0.0608397	-
3	188248722 - 188286278	188558722 - 188596278	rs747952496	188593871	FanC	rs747952496	3:188311659	9.59119e-11	0.0718625	1
7	114065578 - 114104422	114385578 - 114424422	rs1818999	114390959	FanC	rs12667224	7:114024316	2.898e-09	0.0397647	0.972008
7	114065578 - 114104422	114385578 - 114424422	rs1852470	114387214	FanC	rs12667224	7:114024316	3.725e-09	0.0308121	0.972008
7	114065578 - 114104422	114385578 - 114424422	rs6942634	114397903	FanC	rs12667224	7:114024316	2.811e-09	0.0452058	0.919941
7	114065578 - 114104422	114385578 - 114424422	rs12534017	114399396	FanC	rs12667224	7:114024316	3.884e-09	0.0308121	0.892482
7	114065578 - 114104422	114385578 - 114424422	rs10953758	114389808	FanC	rs12667224	7:114024316	1.563e-09	0.127023	1
22	27475001 - 27495000	27795001 - 27815000	rs13057169	27810971	FanC	rs11705555	22:28206912	1.836e-08	0.0413635	0.944523
22	27475001 - 27495000	27795001 - 27815000	rs11703195	27811642	FanC	rs11705555	22:28206912	2.962e-09	0.230451	0.994388
22	27475001 - 27495000	27795001 - 27815000	rs11704137	27812540	FanC	rs11705555	22:28206912	3.694e-09	0.187415	0.994405
22	27475001 - 27495000	27795001 - 27815000	rs11704274	27812741	FanC	rs11705555	22:28206912	3.132e-09	0.230451	0.994405
22	27475001 - 27495000	27795001 - 27815000	rs11705555	27810924	FanC	rs11705555	22:28206912	2.993e-09	0.230451	1
9	115210001 - 115220000	115520001 - 115530000	rs4979549	115528818	FanC	rs1400900375	9:118343026	2.52416e-10	0.0635002	-
9	115210001 - 115220000	115520001 - 115530000	rs6478182	115527482	FanC	rs1400900375	9:118343026	2.27721e-10	0.0701964	-
7	17945673 - 18004327	18315673 - 18374327	rs11764536	18370370	FanC	rs111844273	7:18436337	5.431e-12	0.159176	0.960558
17	1874421 - 1935579	2254421 - 2315579	rs216175	2264396	FanC	rs216175	17:2167690	2.737e-12	0.693888	1
17	1881563 - 1913437	2251563 - 2283437	rs216175	2264396	FanC	rs216175	17:2167690	2.737e-12	0.693888	1
1	219204410 - 219220590	219559410 - 219575590	rs2820444	219568478	FanC	rs2605100	1:219644224	1.345e-14	0.0475909	0.449583
22	27410001 - 27440000	27790001 - 27820000	rs13057169	27810971	FanC	rs11705555	22:28206912	1.836e-08	0.0413635	0.944523
22	27410001 - 27440000	27790001 - 27820000	rs11703195	27811642	FanC	rs11705555	22:28206912	2.962e-09	0.230451	0.994388
22	27410001 - 27440000	27790001 - 27820000	rs11704137	27812540	FanC	rs11705555	22:28206912	3.694e-09	0.187415	0.994405
22	27410001 - 27440000	27790001 - 27820000	rs11704274	27812741	FanC	rs11705555	22:28206912	3.132e-09	0.230451	0.994405
22	27410001 - 27440000	27790001 - 27820000	rs11705555	27810924	FanC	rs11705555	22:28206912	2.993e-09	0.230451	1
9	116137253 - 116172747	116537253 - 116572747	rs1407243	116552572	FanC	rs1321917	9:119324929	3.14866e-18	0.12046	1
9	116137253 - 116172747	116537253 - 116572747	rs1321917	116562650	FanC	rs1321917	9:119324929	2.45628e-18	0.153842	1
9	116137253 - 116172747	116537253 - 116572747	rs10759849	116565910	FanC	rs1321917	9:119324929	5.55357e-18	0.0688933	0.940583
9	116137253 - 116172747	116537253 - 116572747	rs1895062	116551207	FanC	rs1321917	9:119324929	1.76179e-18	0.213395	0.9919
4	144680001 - 144690000	145060001 - 145070000	rs79953717	145065593	FanC	rs75686861	4:145621328	7.674e-08	0.0352585	0.00214199
9	3860001 - 3890000	4280001 - 4310000	rs10974438	4291928	FanC	rs10974438	9:4291928	7.39e-11	0.728404	1
9	3860001 - 3890000	4280001 - 4310000	rs10814915	4290544	FanC	rs10974438	9:4291928	8.129e-10	0.0556886	0.648054
9	3860001 - 3890000	4280001 - 4310000	rs12350099	4298576	FanC	rs10974438	9:4291928	2.075e-09	0.0346145	0.104184
9	3860001 - 3890000	4280001 - 4310000	rs3892354	4282942	FanC	rs10974438	9:4291928	1.361e-09	0.0457541	0.61763
9	3860001 - 3890000	4280001 - 4310000	rs10758594	4295583	FanC	rs10974438	9:4291928	1.108e-09	0.0457541	0.639226
9	116137612 - 116167388	116557612 - 116587388	rs2208562	116582249	FanC	rs1321917	9:119324929	4.98336e-18	0.0766466	0.940583
9	116137612 - 116167388	116557612 - 116587388	rs7856625	116582804	FanC	rs1321917	9:119324929	3.92725e-18	0.0968938	0.936729
9	116137612 - 116167388	116557612 - 116587388	rs1321917	116562650	FanC	rs1321917	9:119324929	2.45628e-18	0.153842	1
9	116137612 - 116167388	116557612 - 116587388	rs11787627	116578758	FanC	rs1321917	9:119324929	5.76407e-18	0.0664105	0.940583
9	116137612 - 116167388	116557612 - 116587388	rs10759849	116565910	FanC	rs1321917	9:119324929	5.55357e-18	0.0688933	0.940583
9	116137612 - 116167388	116557612 - 116587388	rs10759850	116576204	FanC	rs1321917	9:119324929	5.82384e-18	0.0657441	0.940583
7	101802929 - 101827071	102222929 - 102247071	rs113484852	102231061	FanC	rs116934101	7:101775597	1.469e-08	0.0487563	0.822896
7	101802929 - 101827071	102222929 - 102247071	rs73187850	102224544	FanC	rs116934101	7:101775597	1.571e-08	0.0432259	0.832583
9	115100001 - 115110000	115520001 - 115530000	rs4979549	115528818	FanC	rs1400900375	9:118343026	2.52416e-10	0.0635002	-
9	115100001 - 115110000	115520001 - 115530000	rs6478182	115527482	FanC	rs1400900375	9:118343026	2.27721e-10	0.0701964	-
5	128210001 - 128220000	128670001 - 128680000	rs17677724	128679677	FanC	rs17615906	5:128018413	5.869e-11	0.0995121	0.837618
9	115000001 - 115030000	115510001 - 115540000	rs4979549	115528818	FanC	rs1400900375	9:118343026	2.52416e-10	0.0635002	-
9	115000001 - 115030000	115510001 - 115540000	rs6478182	115527482	FanC	rs1400900375	9:118343026	2.27721e-10	0.0701964	-
3	188045001 - 188065000	188565001 - 188585000	rs758236099	188579521	FanC	rs747952496	3:188311659	6.88415e-10	0.0608397	-
7	101682547 - 101707453	102222547 - 102247453	rs113484852	102231061	FanC	rs116934101	7:101775597	1.469e-08	0.0487563	0.822896
7	101682547 - 101707453	102222547 - 102247453	rs73187849	102222554	FanC	rs116934101	7:101775597	1.079e-08	0.0621144	0.832583
7	101682547 - 101707453	102222547 - 102247453	rs73187850	102224544	FanC	rs116934101	7:101775597	1.571e-08	0.0432259	0.832583
9	3745572 - 3769428	4285572 - 4309428	rs10974438	4291928	FanC	rs10974438	9:4291928	7.39e-11	0.728404	1
9	3745572 - 3769428	4285572 - 4309428	rs10814915	4290544	FanC	rs10974438	9:4291928	8.129e-10	0.0556886	0.648054
9	3745572 - 3769428	4285572 - 4309428	rs12350099	4298576	FanC	rs10974438	9:4291928	2.075e-09	0.0346145	0.104184
9	3745572 - 3769428	4285572 - 4309428	rs10758594	4295583	FanC	rs10974438	9:4291928	1.108e-09	0.0457541	0.639226
20	34865001 - 34885000	35435001 - 35455000	rs143384	35437976	FanC	rs143384	20:34025756	1.012e-23	0.940538	1
20	34822547 - 34847453	35432547 - 35457453	rs143384	35437976	FanC	rs143384	20:34025756	1.012e-23	0.940538	1
7	101516608 - 101573392	102206608 - 102263392	rs113484852	102231061	FanC	rs116934101	7:101775597	1.469e-08	0.0487563	0.822896
7	101516608 - 101573392	102206608 - 102263392	rs73187849	102222554	FanC	rs116934101	7:101775597	1.079e-08	0.0621144	0.832583
7	101516608 - 101573392	102206608 - 102263392	rs73187850	102224544	FanC	rs116934101	7:101775597	1.571e-08	0.0432259	0.832583
2	105395001 - 105415000	106055001 - 106075000	rs13014521	106071000	FanC	rs66989638	2:106689736	3.287e-10	0.108067	0.973046
2	105395001 - 105415000	106055001 - 106075000	rs66989638	106073280	FanC	rs66989638	2:106689736	3.311e-11	0.891765	1
15	97955001 - 97975000	98635001 - 98655000	rs12917566	98637015	FanC	rs12914479	15:99174828	3.483e-08	0.086762	0.890965
9	114735001 - 114755000	115515001 - 115535000	rs4979549	115528818	FanC	rs1400900375	9:118343026	2.52416e-10	0.0635002	-
9	114735001 - 114755000	115515001 - 115535000	rs6478182	115527482	FanC	rs1400900375	9:118343026	2.27721e-10	0.0701964	-
3	187723508 - 187766492	188553508 - 188596492	rs758236099	188579521	FanC	rs747952496	3:188311659	6.88415e-10	0.0608397	-
3	187723508 - 187766492	188553508 - 188596492	rs747952496	188593871	FanC	rs747952496	3:188311659	9.59119e-11	0.0718625	1
3	187728971 - 187766029	188563971 - 188601029	rs758236099	188579521	FanC	rs747952496	3:188311659	6.88415e-10	0.0608397	-
3	187728971 - 187766029	188563971 - 188601029	rs747952496	188593871	FanC	rs747952496	3:188311659	9.59119e-11	0.0718625	1
9	114650001 - 114680000	115510001 - 115540000	rs4979549	115528818	FanC	rs1400900375	9:118343026	2.52416e-10	0.0635002	-
9	114650001 - 114680000	115510001 - 115540000	rs6478182	115527482	FanC	rs1400900375	9:118343026	2.27721e-10	0.0701964	-
4	144151281 - 144198719	145041281 - 145088719	rs79953717	145065593	FanC	rs75686861	4:145621328	7.674e-08	0.0352585	0.00214199
9	115677253 - 115712747	116557253 - 116592747	rs2208562	116582249	FanC	rs1321917	9:119324929	4.98336e-18	0.0766466	0.940583
9	115677253 - 115712747	116557253 - 116592747	rs7856625	116582804	FanC	rs1321917	9:119324929	3.92725e-18	0.0968938	0.936729
9	115677253 - 115712747	116557253 - 116592747	rs1321917	116562650	FanC	rs1321917	9:119324929	2.45628e-18	0.153842	1
9	115677253 - 115712747	116557253 - 116592747	rs11787627	116578758	FanC	rs1321917	9:119324929	5.76407e-18	0.0664105	0.940583
9	115677253 - 115712747	116557253 - 116592747	rs10759849	116565910	FanC	rs1321917	9:119324929	5.55357e-18	0.0688933	0.940583
9	115677253 - 115712747	116557253 - 116592747	rs10759850	116576204	FanC	rs1321917	9:119324929	5.82384e-18	0.0657441	0.940583
9	115579693 - 115610307	116559693 - 116590307	rs2208562	116582249	FanC	rs1321917	9:119324929	4.98336e-18	0.0766466	0.940583
9	115579693 - 115610307	116559693 - 116590307	rs7856625	116582804	FanC	rs1321917	9:119324929	3.92725e-18	0.0968938	0.936729
9	115579693 - 115610307	116559693 - 116590307	rs1321917	116562650	FanC	rs1321917	9:119324929	2.45628e-18	0.153842	1
9	115579693 - 115610307	116559693 - 116590307	rs11787627	116578758	FanC	rs1321917	9:119324929	5.76407e-18	0.0664105	0.940583
9	115579693 - 115610307	116559693 - 116590307	rs10759849	116565910	FanC	rs1321917	9:119324929	5.55357e-18	0.0688933	0.940583
9	115579693 - 115610307	116559693 - 116590307	rs10759850	116576204	FanC	rs1321917	9:119324929	5.82384e-18	0.0657441	0.940583
9	115582318 - 115602682	116562318 - 116582682	rs2208562	116582249	FanC	rs1321917	9:119324929	4.98336e-18	0.0766466	0.940583
9	115582318 - 115602682	116562318 - 116582682	rs1321917	116562650	FanC	rs1321917	9:119324929	2.45628e-18	0.153842	1
9	115582318 - 115602682	116562318 - 116582682	rs11787627	116578758	FanC	rs1321917	9:119324929	5.76407e-18	0.0664105	0.940583
9	115582318 - 115602682	116562318 - 116582682	rs10759849	116565910	FanC	rs1321917	9:119324929	5.55357e-18	0.0688933	0.940583
9	115582318 - 115602682	116562318 - 116582682	rs10759850	116576204	FanC	rs1321917	9:119324929	5.82384e-18	0.0657441	0.940583
22	26751465 - 26763535	27801465 - 27813535	rs13057169	27810971	FanC	rs11705555	22:28206912	1.836e-08	0.0413635	0.944523
22	26751465 - 26763535	27801465 - 27813535	rs11703195	27811642	FanC	rs11705555	22:28206912	2.962e-09	0.230451	0.994388
22	26751465 - 26763535	27801465 - 27813535	rs11704137	27812540	FanC	rs11705555	22:28206912	3.694e-09	0.187415	0.994405
22	26751465 - 26763535	27801465 - 27813535	rs11704274	27812741	FanC	rs11705555	22:28206912	3.132e-09	0.230451	0.994405
22	26751465 - 26763535	27801465 - 27813535	rs11705555	27810924	FanC	rs11705555	22:28206912	2.993e-09	0.230451	1
1	218313237 - 218356763	219543237 - 219586763	rs2820444	219568478	FanC	rs2605100	1:219644224	1.345e-14	0.0475909	0.449583
4	100420001 - 100430000	102260001 - 102270000	rs13107325	102267552	FanC	rs13107325	4:103188709	3.248e-17	0.963611	1
8	126870001 - 126880000	129720001 - 129730000	rs2062078	129722215	FanC	rs11984666	8:130730280	2.987e-15	0.032547	1
8	126870001 - 126880000	129720001 - 129730000	rs7815298	129720493	FanC	rs11984666	8:130730280	3.011e-15	0.032547	1
8	126870001 - 126880000	129720001 - 129730000	rs60228607	129723214	FanC	rs11984666	8:130730280	3.212e-15	0.0307211	1
8	126870001 - 126880000	129720001 - 129730000	rs765002298	129721601	FanC	rs11984666	8:130730280	3.115e-15	0.0307583	-
8	126820001 - 126830000	129720001 - 129730000	rs2062078	129722215	FanC	rs11984666	8:130730280	2.987e-15	0.032547	1
8	126820001 - 126830000	129720001 - 129730000	rs7815298	129720493	FanC	rs11984666	8:130730280	3.011e-15	0.032547	1
8	126820001 - 126830000	129720001 - 129730000	rs60228607	129723214	FanC	rs11984666	8:130730280	3.212e-15	0.0307211	1
8	126820001 - 126830000	129720001 - 129730000	rs765002298	129721601	FanC	rs11984666	8:130730280	3.115e-15	0.0307583	-
1	118235000 - 118240000	118340000 - 118345000	rs2884774	118237349	HiCExplorer	rs4411121	1:118757034	7.697e-11	0.0689794	0.890299
1	118235000 - 118240000	118340000 - 118345000	rs12074699	118235995	HiCExplorer	rs4411121	1:118757034	6.495e-11	0.0845196	0.885825
1	183970000 - 183980000	184390000 - 184400000	rs4651159	183972030	HiCExplorer	rs10797923	1:183901966	2.3773e-07	0.0346985	0.00425939
1	183970000 - 183980000	184390000 - 184400000	rs4651160	183972068	HiCExplorer	rs10797923	1:183901966	2.39112e-07	0.0345063	0.00425939
1	227760000 - 227770000	227930000 - 227940000	rs11580196	227767575	HiCExplorer	rs11588850	1:227927242	6.739e-10	0.231308	1
11	47930000 - 47940000	48100000 - 48110000	rs1227995	47938658	HiCExplorer	rs1631174	11:47974373	1.458e-08	0.0335532	0.995545
12	58890000 - 58900000	59120000 - 59130000	rs17120227	58895568	HiCExplorer	rs17120227	12:59289349	7.206e-13	0.276125	1
12	58890000 - 58900000	59120000 - 59130000	rs11172801	58894199	HiCExplorer	rs17120227	12:59289349	3.787e-12	0.0600745	0.922052
12	58890000 - 58900000	59120000 - 59130000	rs11172805	58896498	HiCExplorer	rs17120227	12:59289349	4.028e-12	0.0471801	0.922052
12	58890000 - 58900000	59120000 - 59130000	rs11172808	58899816	HiCExplorer	rs17120227	12:59289349	5.135e-12	0.0393922	0.922052
12	58890000 - 58900000	59120000 - 59130000	rs79056043	58895817	HiCExplorer	rs17120227	12:59289349	6.095e-12	0.0379118	0.864017
12	108230000 - 108240000	108450000 - 108460000	rs1426371	108236003	HiCExplorer	rs1426371	12:108629780	8.855e-10	0.47357	1
15	67070000 - 67075000	67250000 - 67255000	rs7163797	67072574	HiCExplorer	rs12908498	15:67366488	1.476e-15	0.0424531	0.996013
15	67070000 - 67075000	67250000 - 67255000	rs10518707	67073284	HiCExplorer	rs12908498	15:67366488	1.474e-15	0.0424531	0.996013
15	67070000 - 67075000	67250000 - 67255000	rs7177795	67074495	HiCExplorer	rs12908498	15:67366488	1.736e-15	0.0389403	0.996013
15	67070000 - 67075000	67250000 - 67255000	rs7178381	67074846	HiCExplorer	rs12908498	15:67366488	1.643e-15	0.0424531	0.996013
15	67070000 - 67075000	67250000 - 67255000	rs12908498	67074150	HiCExplorer	rs12908498	15:67366488	1.85e-16	0.361447	1
19	45880000 - 45890000	46010000 - 46020000	rs8112559	45887197	HiCExplorer	rs8112559	19:46390455	7.317e-11	0.308911	1
19	45880000 - 45890000	46010000 - 46020000	rs8112972	45887347	HiCExplorer	rs8112559	19:46390455	1.163e-10	0.200972	0.989288
19	45880000 - 45890000	46010000 - 46020000	rs11550348	45884086	HiCExplorer	rs8112559	19:46390455	9.071e-11	0.279626	1
22	27810000 - 27820000	27860000 - 27870000	rs13057169	27810971	HiCExplorer	rs11705555	22:28206912	1.836e-08	0.0413635	0.944523
22	27810000 - 27820000	27860000 - 27870000	rs11703195	27811642	HiCExplorer	rs11705555	22:28206912	2.962e-09	0.230451	0.994388
22	27810000 - 27820000	27860000 - 27870000	rs11704137	27812540	HiCExplorer	rs11705555	22:28206912	3.694e-09	0.187415	0.994405
22	27810000 - 27820000	27860000 - 27870000	rs11704274	27812741	HiCExplorer	rs11705555	22:28206912	3.132e-09	0.230451	0.994405
22	27810000 - 27820000	27860000 - 27870000	rs11705555	27810924	HiCExplorer	rs11705555	22:28206912	2.993e-09	0.230451	1
3	188575000 - 188580000	188680000 - 188685000	rs758236099	188579521	HiCExplorer	rs747952496	3:188311659	6.88415e-10	0.0608397	-
4	1710000 - 1720000	2240000 - 2250000	rs2236786	1717567	HiCExplorer	rs1530586	4:1760927	1.801e-13	0.0303651	0.918641
6	18400000 - 18410000	19710000 - 19720000	rs9396861	18403902	HiCExplorer	rs9396861	6:18404133	9.347e-11	0.677236	1
6	35140000 - 35150000	35230000 - 35240000	rs2038740	35146765	HiCExplorer	rs2038740	6:35114542	6.195e-10	0.337959	1
6	35140000 - 35150000	35230000 - 35240000	rs9394274	35147134	HiCExplorer	rs2038740	6:35114542	6.201e-10	0.337959	1
6	35145000 - 35150000	35205000 - 35210000	rs2038740	35146765	HiCExplorer	rs2038740	6:35114542	6.195e-10	0.337959	1
6	35145000 - 35150000	35205000 - 35210000	rs9394274	35147134	HiCExplorer	rs2038740	6:35114542	6.201e-10	0.337959	1
9	4295000 - 4300000	4675000 - 4680000	rs12350099	4298576	HiCExplorer	rs10974438	9:4291928	2.075e-09	0.0346145	0.104184
9	4295000 - 4300000	4675000 - 4680000	rs10758594	4295583	HiCExplorer	rs10974438	9:4291928	1.108e-09	0.0457541	0.639226
9	95500000 - 95510000	95870000 - 95880000	rs28427480	95502660	HiCExplorer	rs76340814	9:98321412	7.474e-09	0.0354521	0.260626
9	95500000 - 95510000	95870000 - 95880000	rs16909922	95503619	HiCExplorer	rs76340814	9:98321412	8.58e-09	0.0313744	0.260626
9	95500000 - 95510000	96040000 - 96050000	rs28427480	95502660	HiCExplorer	rs76340814	9:98321412	7.474e-09	0.0354521	0.260626
9	95500000 - 95510000	96040000 - 96050000	rs16909922	95503619	HiCExplorer	rs76340814	9:98321412	8.58e-09	0.0313744	0.260626
9	95500000 - 95510000	96210000 - 96220000	rs28427480	95502660	HiCExplorer	rs76340814	9:98321412	7.474e-09	0.0354521	0.260626
9	95500000 - 95510000	96210000 - 96220000	rs16909922	95503619	HiCExplorer	rs76340814	9:98321412	8.58e-09	0.0313744	0.260626
9	107640000 - 107650000	107930000 - 107940000	rs7875152	107642502	HiCExplorer	rs79895530	9:110416422	1.377e-13	0.0448873	0.894928
9	107640000 - 107650000	108440000 - 108450000	rs7875152	107642502	HiCExplorer	rs79895530	9:110416422	1.377e-13	0.0448873	0.894928
9	115580000 - 115590000	116850000 - 116860000	rs1400900375	115580746	HiCExplorer	rs1400900375	9:118343026	4.39537e-11	0.318598	1
9	115580000 - 115590000	116850000 - 116860000	rs11451416	115580868	HiCExplorer	rs1400900375	9:118343026	2.25006e-10	0.0710285	-
9	115580000 - 115590000	116850000 - 116860000	rs10739455	115580751	HiCExplorer	rs1400900375	9:118343026	5.76817e-11	0.244387	-
9	115580000 - 115590000	116660000 - 116670000	rs1400900375	115580746	HiCExplorer	rs1400900375	9:118343026	4.39537e-11	0.318598	1
9	115580000 - 115590000	116660000 - 116670000	rs11451416	115580868	HiCExplorer	rs1400900375	9:118343026	2.25006e-10	0.0710285	-
9	115580000 - 115590000	116660000 - 116670000	rs10739455	115580751	HiCExplorer	rs1400900375	9:118343026	5.76817e-11	0.244387	-
9	117770000 - 117780000	119530000 - 119540000	rs1475546	117771144	HiCExplorer	rs10983775	9:120521100	1.921e-08	0.0424192	1
9	126610000 - 126615000	126690000 - 126695000	rs12377624	126610831	HiCExplorer	rs62578126	9:129375338	1.93645e-12	0.117236	1
9	126610000 - 126615000	126690000 - 126695000	rs62578126	126613059	HiCExplorer	rs62578126	9:129375338	1.48999e-12	0.151497	1
9	126610000 - 126620000	126780000 - 126790000	rs1336980	126615576	HiCExplorer	rs62578126	9:129375338	2.63713e-12	0.0866757	1
9	126610000 - 126620000	126780000 - 126790000	rs12377624	126610831	HiCExplorer	rs62578126	9:129375338	1.93645e-12	0.117236	1
9	126610000 - 126620000	126780000 - 126790000	rs62578126	126613059	HiCExplorer	rs62578126	9:129375338	1.48999e-12	0.151497	1
9	126610000 - 126620000	126780000 - 126790000	rs10987373	126616951	HiCExplorer	rs62578126	9:129375338	4.40879e-12	0.052448	0.995764
1	183650000 - 183660000	184040000 - 184050000	rs12029527	184044184	HiCExplorer	rs1327123	1:184014593	6.47897e-15	0.038338	0.964021
1	183650000 - 183660000	184040000 - 184050000	rs10797937	184047997	HiCExplorer	rs1327123	1:184014593	5.07786e-15	0.048696	0.99549
1	183650000 - 183660000	184040000 - 184050000	rs1327123	184045459	HiCExplorer	rs1327123	1:184014593	2.22972e-15	0.10925	1
1	183650000 - 183660000	184040000 - 184050000	rs12047271	184044357	HiCExplorer	rs1327123	1:184014593	4.00487e-15	0.0614784	0.964021
1	183650000 - 183660000	184040000 - 184050000	rs12044334	184044697	HiCExplorer	rs1327123	1:184014593	4.66463e-15	0.0529277	0.959555
1	183650000 - 183660000	184040000 - 184050000	rs4650650	184043707	HiCExplorer	rs1327123	1:184014593	5.88299e-15	0.0421479	0.964021
1	183650000 - 183660000	184040000 - 184050000	rs1926872	184049341	HiCExplorer	rs1327123	1:184014593	5.45778e-15	0.0453654	0.99549
1	183950000 - 183960000	184030000 - 184040000	rs74767794	184036994	HiCExplorer	rs1327123	1:184014593	2.30152e-15	0.10887	0.829582
1	183950000 - 183960000	184030000 - 184040000	rs3814333	184037985	HiCExplorer	rs1327123	1:184014593	3.35362e-15	0.0752294	0.829582
1	218330000 - 218340000	219560000 - 219570000	rs2820444	219568478	HiCExplorer	rs2605100	1:219644224	1.345e-14	0.0475909	0.449583
1	219070000 - 219080000	219560000 - 219570000	rs2820444	219568478	HiCExplorer	rs2605100	1:219644224	1.345e-14	0.0475909	0.449583
1	219200000 - 219210000	219560000 - 219570000	rs2820444	219568478	HiCExplorer	rs2605100	1:219644224	1.345e-14	0.0475909	0.449583
11	11490000 - 11500000	12690000 - 12700000	rs7105783	12698247	HiCExplorer	rs3993110	11:12794530	8.511e-11	0.051319	0.794206
12	58330000 - 58340000	58900000 - 58910000	rs10877185	58904205	HiCExplorer	rs17120227	12:59289349	3.062e-12	0.0765869	0.902712
12	58330000 - 58340000	58900000 - 58910000	rs1020031	58901672	HiCExplorer	rs17120227	12:59289349	5.221e-12	0.038228	0.922052
12	58330000 - 58340000	58900000 - 58910000	rs11172811	58901935	HiCExplorer	rs17120227	12:59289349	4.763e-12	0.048422	0.922052
12	58330000 - 58340000	58900000 - 58910000	rs11172812	58902502	HiCExplorer	rs17120227	12:59289349	4.014e-12	0.0546652	0.902712
12	58330000 - 58340000	58900000 - 58910000	rs11172817	58904326	HiCExplorer	rs17120227	12:59289349	4.578e-12	0.0431069	0.922052
12	58330000 - 58340000	58900000 - 58910000	rs11172818	58904509	HiCExplorer	rs17120227	12:59289349	4.462e-12	0.051447	0.902712
12	58330000 - 58340000	58900000 - 58910000	rs2167030	58901891	HiCExplorer	rs17120227	12:59289349	4.554e-12	0.051447	0.922052
12	93570000 - 93575000	93740000 - 93745000	rs7953280	93742233	HiCExplorer	rs7953280	12:94136009	4.835e-12	0.0772942	1
19	10570000 - 10580000	10640000 - 10650000	rs1975163	10645723	HiCExplorer	rs10405617	19:10752968	1.15438e-10	0.0568143	1
19	10570000 - 10580000	10640000 - 10650000	rs10405617	10642292	HiCExplorer	rs10405617	19:10752968	1.15422e-10	0.0568171	1
19	10570000 - 10580000	10640000 - 10650000	rs10408721	10647643	HiCExplorer	rs10405617	19:10752968	1.77905e-10	0.0372387	0.945915
19	10570000 - 10580000	10640000 - 10650000	rs10948	10644229	HiCExplorer	rs10405617	19:10752968	2.00591e-10	0.0331206	1
19	45860000 - 45865000	45885000 - 45890000	rs8112559	45887197	HiCExplorer	rs8112559	19:46390455	7.317e-11	0.308911	1
19	45860000 - 45865000	45885000 - 45890000	rs8112972	45887347	HiCExplorer	rs8112559	19:46390455	1.163e-10	0.200972	0.989288
2	203240000 - 203250000	203440000 - 203450000	rs55881728	203441633	HiCExplorer	rs62182810	2:204387482	8.714e-09	0.0367355	0.803471
21	37370000 - 37380000	39330000 - 39340000	rs144379281	39337078	HiCExplorer	rs9981884	21:40585633	9.92026e-09	0.0673716	0.791163
21	37370000 - 37380000	39330000 - 39340000	rs386818544	39337078	HiCExplorer	rs9981884	21:40585633	1.91005e-08	0.0357192	-
22	37620000 - 37625000	37785000 - 37790000	rs13055462	37788678	HiCExplorer	rs12160491	22:38195796	3.856e-10	0.037293	0.92524
22	37620000 - 37625000	37785000 - 37790000	rs13056052	37788865	HiCExplorer	rs12160491	22:38195796	4.29e-10	0.0335392	0.92524
22	37620000 - 37625000	37785000 - 37790000	rs8136037	37787990	HiCExplorer	rs12160491	22:38195796	3.953e-10	0.035365	0.92524
22	37620000 - 37625000	37785000 - 37790000	rs8136757	37789964	HiCExplorer	rs12160491	22:38195796	4.245e-10	0.0335392	0.920685
22	37620000 - 37625000	37785000 - 37790000	rs8137848	37789987	HiCExplorer	rs12160491	22:38195796	4.223e-10	0.0335392	0.920685
3	10200000 - 10210000	11600000 - 11610000	rs2117870	11600803	HiCExplorer	rs2276749	3:11643465	5.162e-09	0.0499327	0.977704
3	10200000 - 10210000	11600000 - 11610000	rs2276749	11601991	HiCExplorer	rs2276749	3:11643465	3.34e-09	0.0774542	1
3	10200000 - 10210000	11600000 - 11610000	rs6786146	11604241	HiCExplorer	rs2276749	3:11643465	4.103e-09	0.0585811	0.977704
3	10200000 - 10210000	11600000 - 11610000	rs6799718	11600785	HiCExplorer	rs2276749	3:11643465	4.094e-09	0.0627464	-
3	10200000 - 10210000	11600000 - 11610000	rs6810015	11604111	HiCExplorer	rs2276749	3:11643465	4.793e-09	0.0534658	0.977704
3	10200000 - 10210000	11600000 - 11610000	rs12633581	11601220	HiCExplorer	rs2276749	3:11643465	4.128e-09	0.0613251	0.977704
3	11510000 - 11515000	11600000 - 11605000	rs2117870	11600803	HiCExplorer	rs2276749	3:11643465	5.162e-09	0.0499327	0.977704
3	11510000 - 11515000	11600000 - 11605000	rs2276749	11601991	HiCExplorer	rs2276749	3:11643465	3.34e-09	0.0774542	1
3	11510000 - 11515000	11600000 - 11605000	rs6786146	11604241	HiCExplorer	rs2276749	3:11643465	4.103e-09	0.0585811	0.977704
3	11510000 - 11515000	11600000 - 11605000	rs6799718	11600785	HiCExplorer	rs2276749	3:11643465	4.094e-09	0.0627464	-
3	11510000 - 11515000	11600000 - 11605000	rs6810015	11604111	HiCExplorer	rs2276749	3:11643465	4.793e-09	0.0534658	0.977704
3	11510000 - 11515000	11600000 - 11605000	rs12633581	11601220	HiCExplorer	rs2276749	3:11643465	4.128e-09	0.0613251	0.977704
3	187740000 - 187750000	188570000 - 188580000	rs758236099	188579521	HiCExplorer	rs747952496	3:188311659	6.88415e-10	0.0608397	-
3	188160000 - 188170000	188570000 - 188580000	rs758236099	188579521	HiCExplorer	rs747952496	3:188311659	6.88415e-10	0.0608397	-
3	188265000 - 188270000	188575000 - 188580000	rs758236099	188579521	HiCExplorer	rs747952496	3:188311659	6.88415e-10	0.0608397	-
3	188470000 - 188480000	188570000 - 188580000	rs758236099	188579521	HiCExplorer	rs747952496	3:188311659	6.88415e-10	0.0608397	-
4	1205000 - 1210000	1715000 - 1720000	rs2236786	1717567	HiCExplorer	rs1530586	4:1760927	1.801e-13	0.0303651	0.918641
4	101360000 - 101370000	102260000 - 102270000	rs13107325	102267552	HiCExplorer	rs13107325	4:103188709	3.248e-17	0.963611	1
4	144170000 - 144180000	145060000 - 145070000	rs79953717	145065593	HiCExplorer	rs75686861	4:145621328	7.674e-08	0.0352585	0.00214199
4	144440000 - 144450000	145060000 - 145070000	rs79953717	145065593	HiCExplorer	rs75686861	4:145621328	7.674e-08	0.0352585	0.00214199
5	68440000 - 68445000	68530000 - 68535000	rs1423232	68533051	HiCExplorer	rs56132153	5:67825133	6.716e-09	0.05442	0.971179
5	68440000 - 68445000	68530000 - 68535000	rs7704228	68530907	HiCExplorer	rs56132153	5:67825133	9.727e-09	0.0475991	0.891576
5	68440000 - 68445000	68530000 - 68535000	rs34485661	68532398	HiCExplorer	rs56132153	5:67825133	9.88e-09	0.0380206	0.983312
5	68440000 - 68445000	68530000 - 68535000	rs28562175	68531629	HiCExplorer	rs56132153	5:67825133	8.81e-09	0.0397168	0.891576
5	127560000 - 127570000	128670000 - 128680000	rs17677724	128679677	HiCExplorer	rs17615906	5:128018413	5.869e-11	0.0995121	0.837618
5	127770000 - 127780000	128520000 - 128530000	rs13155917	128520801	HiCExplorer	rs17615906	5:128018413	1.59e-10	0.0323615	0.458928
5	128210000 - 128220000	128670000 - 128680000	rs17677724	128679677	HiCExplorer	rs17615906	5:128018413	5.869e-11	0.0995121	0.837618
5	142245000 - 142250000	142425000 - 142430000	rs6861056	142425850	HiCExplorer	rs10062749	5:141805088	2.61e-08	0.0323203	0.955095
5	142245000 - 142250000	142425000 - 142430000	rs10062749	142425523	HiCExplorer	rs10062749	5:141805088	2.041e-09	0.368769	1
5	142245000 - 142250000	142425000 - 142430000	rs10076308	142425104	HiCExplorer	rs10062749	5:141805088	2.354e-09	0.337862	1
5	142245000 - 142250000	142425000 - 142430000	rs28538668	142425735	HiCExplorer	rs10062749	5:141805088	2.383e-08	0.0350883	0.955095
6	26060000 - 26070000	26090000 - 26100000	rs1800562	26092913	HiCExplorer	rs79220007	6:26098474	2.923e-09	0.211815	1
6	26060000 - 26070000	26090000 - 26100000	rs79220007	26098246	HiCExplorer	rs79220007	6:26098474	2.215e-09	0.295805	1
6	74600000 - 74610000	75450000 - 75460000	rs12209223	75454873	HiCExplorer	rs12209223	6:76164589	1.921e-29	0.853174	1
7	101690000 - 101700000	102230000 - 102240000	rs113484852	102231061	HiCExplorer	rs116934101	7:101775597	1.469e-08	0.0487563	0.822896
7	101810000 - 101820000	102230000 - 102240000	rs113484852	102231061	HiCExplorer	rs116934101	7:101775597	1.469e-08	0.0487563	0.822896
9	3870000 - 3880000	4290000 - 4300000	rs10974438	4291928	HiCExplorer	rs10974438	9:4291928	7.39e-11	0.728404	1
9	3870000 - 3880000	4290000 - 4300000	rs10814915	4290544	HiCExplorer	rs10974438	9:4291928	8.129e-10	0.0556886	0.648054
9	3870000 - 3880000	4290000 - 4300000	rs12350099	4298576	HiCExplorer	rs10974438	9:4291928	2.075e-09	0.0346145	0.104184
9	3870000 - 3880000	4290000 - 4300000	rs10758594	4295583	HiCExplorer	rs10974438	9:4291928	1.108e-09	0.0457541	0.639226
9	4035000 - 4040000	4290000 - 4295000	rs10974438	4291928	HiCExplorer	rs10974438	9:4291928	7.39e-11	0.728404	1
9	4035000 - 4040000	4290000 - 4295000	rs10814915	4290544	HiCExplorer	rs10974438	9:4291928	8.129e-10	0.0556886	0.648054
9	4140000 - 4145000	4290000 - 4295000	rs10974438	4291928	HiCExplorer	rs10974438	9:4291928	7.39e-11	0.728404	1
9	4140000 - 4145000	4290000 - 4295000	rs10814915	4290544	HiCExplorer	rs10974438	9:4291928	8.129e-10	0.0556886	0.648054
9	114100000 - 114110000	114150000 - 114160000	rs72760655	114153934	HiCExplorer	rs72760655	9:116916214	1.15816e-12	0.309825	1
9	114410000 - 114420000	115520000 - 115530000	rs4979549	115528818	HiCExplorer	rs1400900375	9:118343026	2.52416e-10	0.0635002	-
9	114410000 - 114420000	115520000 - 115530000	rs6478182	115527482	HiCExplorer	rs1400900375	9:118343026	2.27721e-10	0.0701964	-
9	114660000 - 114670000	115520000 - 115530000	rs4979549	115528818	HiCExplorer	rs1400900375	9:118343026	2.52416e-10	0.0635002	-
9	114660000 - 114670000	115520000 - 115530000	rs6478182	115527482	HiCExplorer	rs1400900375	9:118343026	2.27721e-10	0.0701964	-
9	114740000 - 114750000	115520000 - 115530000	rs4979549	115528818	HiCExplorer	rs1400900375	9:118343026	2.52416e-10	0.0635002	-
9	114740000 - 114750000	115520000 - 115530000	rs6478182	115527482	HiCExplorer	rs1400900375	9:118343026	2.27721e-10	0.0701964	-
9	114910000 - 114920000	115520000 - 115530000	rs4979549	115528818	HiCExplorer	rs1400900375	9:118343026	2.52416e-10	0.0635002	-
9	114910000 - 114920000	115520000 - 115530000	rs6478182	115527482	HiCExplorer	rs1400900375	9:118343026	2.27721e-10	0.0701964	-
9	115025000 - 115030000	115525000 - 115530000	rs4979549	115528818	HiCExplorer	rs1400900375	9:118343026	2.52416e-10	0.0635002	-
9	115025000 - 115030000	115525000 - 115530000	rs6478182	115527482	HiCExplorer	rs1400900375	9:118343026	2.27721e-10	0.0701964	-
9	115100000 - 115110000	115520000 - 115530000	rs4979549	115528818	HiCExplorer	rs1400900375	9:118343026	2.52416e-10	0.0635002	-
9	115100000 - 115110000	115520000 - 115530000	rs6478182	115527482	HiCExplorer	rs1400900375	9:118343026	2.27721e-10	0.0701964	-
9	115590000 - 115600000	116570000 - 116580000	rs11787627	116578758	HiCExplorer	rs1321917	9:119324929	5.76407e-18	0.0664105	0.940583
9	115590000 - 115600000	116570000 - 116580000	rs10759850	116576204	HiCExplorer	rs1321917	9:119324929	5.82384e-18	0.0657441	0.940583
9	115690000 - 115700000	116570000 - 116580000	rs11787627	116578758	HiCExplorer	rs1321917	9:119324929	5.76407e-18	0.0664105	0.940583
9	115690000 - 115700000	116570000 - 116580000	rs10759850	116576204	HiCExplorer	rs1321917	9:119324929	5.82384e-18	0.0657441	0.940583
9	116150000 - 116160000	116550000 - 116560000	rs1407243	116552572	HiCExplorer	rs1321917	9:119324929	3.14866e-18	0.12046	1
9	116150000 - 116160000	116550000 - 116560000	rs1895062	116551207	HiCExplorer	rs1321917	9:119324929	1.76179e-18	0.213395	0.9919
9	127020000 - 127025000	127155000 - 127160000	rs10465114	127155545	HiCExplorer	rs10465114	9:129917824	1.00206e-08	0.0667576	1
1	102934445 - 102944444	103024445 - 103034444	rs2616010	102943761	SIP	rs11164653	1:103464210	5.598e-17	0.03225	0.821978
1	102934445 - 102944444	103024445 - 103034444	rs2622865	102942443	SIP	rs11164653	1:103464210	6.002e-17	0.03225	0.821978
1	102934445 - 102944444	103024445 - 103034444	rs6682134	102937179	SIP	rs11164653	1:103464210	4.905e-17	0.0387807	0.818246
1	102934445 - 102944444	103024445 - 103034444	rs12046389	102943544	SIP	rs11164653	1:103464210	3.141e-17	0.0561584	0.82598
1	102934445 - 102944444	103024445 - 103034444	rs3767273	102935477	SIP	rs11164653	1:103464210	4.561e-17	0.042534	0.818246
1	102934445 - 102944444	103024445 - 103034444	rs12045404	102942713	SIP	rs11164653	1:103464210	4.242e-17	0.042534	0.82598
1	102934445 - 102944444	103024445 - 103034444	rs984022	102939801	SIP	rs11164653	1:103464210	5.252e-17	0.0353628	0.821978
1	102934445 - 102944444	103024445 - 103034444	rs1841838	102942315	SIP	rs11164653	1:103464210	4.654e-17	0.0387807	0.82598
1	118207378 - 118217377	118817378 - 118827377	rs4411121	118214411	SIP	rs4411121	1:118757034	2.161e-11	0.228046	1
1	183970867 - 183980866	184390867 - 184400866	rs4651159	183972030	SIP	rs10797923	1:183901966	2.3773e-07	0.0346985	0.00425939
1	183970867 - 183980866	184390867 - 184400866	rs4651160	183972068	SIP	rs10797923	1:183901966	2.39112e-07	0.0345063	0.00425939
1	227732300 - 227742299	228152300 - 228162299	rs11588850	227739541	SIP	rs11588850	1:227927242	3.528e-10	0.391126	1
1	227762300 - 227772299	227932300 - 227942299	rs11580196	227767575	SIP	rs11588850	1:227927242	6.739e-10	0.231308	1
11	28818454 - 28828453	30048454 - 30058453	rs1517564	28818871	SIP	rs1517572	11:28829882	3.661e-09	0.0305775	0.925195
11	28818454 - 28828453	30048454 - 30058453	rs2959131	28826853	SIP	rs1517572	11:28829882	3.47e-09	0.0336854	0.897033
11	65572530 - 65577529	65607530 - 65612529	rs67924081	65575510	SIP	rs67924081	11:65342981	2.144e-13	0.171608	1
12	93736225 - 93746224	94026225 - 94036224	rs7953280	93742233	SIP	rs7953280	12:94136009	4.835e-12	0.0772942	1
12	108226224 - 108236223	108456224 - 108466223	rs1426371	108236003	SIP	rs1426371	12:108629780	8.855e-10	0.47357	1
15	67067663 - 67077662	67827663 - 67837662	rs7163797	67072574	SIP	rs12908498	15:67366488	1.476e-15	0.0424531	0.996013
15	67067663 - 67077662	67827663 - 67837662	rs10518707	67073284	SIP	rs12908498	15:67366488	1.474e-15	0.0424531	0.996013
15	67067663 - 67077662	67827663 - 67837662	rs7177795	67074495	SIP	rs12908498	15:67366488	1.736e-15	0.0389403	0.996013
15	67067663 - 67077662	67827663 - 67837662	rs7178381	67074846	SIP	rs12908498	15:67366488	1.643e-15	0.0424531	0.996013
15	67067663 - 67077662	67827663 - 67837662	rs1498506	67075296	SIP	rs12908498	15:67366488	1.48e-15	0.0462884	0.996013
15	67067663 - 67077662	67827663 - 67837662	rs1498507	67075368	SIP	rs12908498	15:67366488	1.463e-15	0.0462884	0.996013
15	67067663 - 67077662	67827663 - 67837662	rs28613758	67076321	SIP	rs12908498	15:67366488	8.263e-16	0.0850826	1
15	67067663 - 67077662	67827663 - 67837662	rs12908498	67074150	SIP	rs12908498	15:67366488	1.85e-16	0.361447	1
16	53766089 - 53776088	54281089 - 54286088	rs11642015	53768582	SIP	rs9940278	16:53800200	5.256e-18	0.0302121	0.956547
16	53766089 - 53776088	54281089 - 54286088	rs9939973	53766656	SIP	rs9940278	16:53800200	2.746e-18	0.0348466	1
16	53766089 - 53776088	54281089 - 54286088	rs9940128	53766842	SIP	rs9940278	16:53800200	2.335e-18	0.0402028	1
16	53766089 - 53776088	54281089 - 54286088	rs9940278	53766288	SIP	rs9940278	16:53800200	1.454e-18	0.0714181	1
16	53766089 - 53776088	54281089 - 54286088	rs9940646	53766717	SIP	rs9940278	16:53800200	2.439e-18	0.0402028	1
16	53766089 - 53776088	54281089 - 54286088	rs1421085	53767042	SIP	rs9940278	16:53800200	4.619e-18	0.0348466	0.956547
16	53766089 - 53776088	54281089 - 54286088	rs1421086	53767431	SIP	rs9940278	16:53800200	2.896e-18	0.0348466	0.995981
16	53766089 - 53776088	54281089 - 54286088	rs1558901	53769275	SIP	rs9940278	16:53800200	3.025e-18	0.0302121	1
16	53766089 - 53776088	54281089 - 54286088	rs1558902	53769662	SIP	rs9940278	16:53800200	5.246e-18	0.0302121	0.956547
16	53766089 - 53776088	54281089 - 54286088	rs62048402	53769311	SIP	rs9940278	16:53800200	5.592e-18	0.0302121	0.956547
16	53766089 - 53776088	54281089 - 54286088	rs1121980	53775335	SIP	rs9940278	16:53800200	2.223e-18	0.0402028	1
16	53766089 - 53776088	54281089 - 54286088	rs9923147	53767637	SIP	rs9940278	16:53800200	2.697e-18	0.0348466	1
16	53766089 - 53776088	54281089 - 54286088	rs9923544	53768073	SIP	rs9940278	16:53800200	2.761e-18	0.0348466	1
16	53766089 - 53776088	54281089 - 54286088	rs55872725	53775211	SIP	rs9940278	16:53800200	3.349e-18	0.0463948	0.956547
16	53771089 - 53776088	54926089 - 54936088	rs1121980	53775335	SIP	rs9940278	16:53800200	2.223e-18	0.0402028	1
16	53771089 - 53776088	54926089 - 54936088	rs55872725	53775211	SIP	rs9940278	16:53800200	3.349e-18	0.0463948	0.956547
19	41324096 - 41334095	41563631 - 41573648	rs75621460	41327879	SIP	rs75621460	19:41833784	2.721e-10	0.99968	1
19	45876743 - 45886742	46006743 - 46016742	rs11550348	45884086	SIP	rs8112559	19:46390455	9.071e-11	0.279626	1
4	1708274 - 1718273	2238274 - 2248273	rs2236786	1717567	SIP	rs1530586	4:1760927	1.801e-13	0.0303651	0.918641
4	1708274 - 1718273	1808274 - 1818273	rs2236786	1717567	SIP	rs1530586	4:1760927	1.801e-13	0.0303651	0.918641
5	128664308 - 128674307	131094308 - 131104307	rs7706547	128665200	SIP	rs17615906	5:128018413	2.317e-10	0.0341386	0.771063
5	142425436 - 142430435	142690436 - 142695435	rs6861056	142425850	SIP	rs10062749	5:141805088	2.61e-08	0.0323203	0.955095
5	142425436 - 142430435	142690436 - 142695435	rs10062749	142425523	SIP	rs10062749	5:141805088	2.041e-09	0.368769	1
5	142425436 - 142430435	142690436 - 142695435	rs28538668	142425735	SIP	rs10062749	5:141805088	2.383e-08	0.0350883	0.955095
5	171442997 - 171452996	171852997 - 171857996	rs3884606	171444070	SIP	rs3884606	5:170871074	8.956e-10	0.533249	1
6	26119773 - 26129772	26279773 - 26284772	rs115740542	26123274	SIP	rs79220007	6:26098474	7.702e-09	0.0943302	0.976258
6	26119773 - 26124772	27832223 - 27842222	rs115740542	26123274	SIP	rs79220007	6:26098474	7.702e-09	0.0943302	0.976258
6	35142224 - 35152223	35202224 - 35207223	rs2038740	35146765	SIP	rs2038740	6:35114542	6.195e-10	0.337959	1
6	35142224 - 35152223	35202224 - 35207223	rs9394274	35147134	SIP	rs2038740	6:35114542	6.201e-10	0.337959	1
6	35142224 - 35147223	35732224 - 35742223	rs2038740	35146765	SIP	rs2038740	6:35114542	6.195e-10	0.337959	1
6	35142224 - 35147223	35732224 - 35742223	rs9394274	35147134	SIP	rs2038740	6:35114542	6.201e-10	0.337959	1
9	4290001 - 4300000	4670001 - 4680000	rs10974438	4291928	SIP	rs10974438	9:4291928	7.39e-11	0.728404	1
9	4290001 - 4300000	4670001 - 4680000	rs10814915	4290544	SIP	rs10974438	9:4291928	8.129e-10	0.0556886	0.648054
9	4290001 - 4300000	4670001 - 4680000	rs12350099	4298576	SIP	rs10974438	9:4291928	2.075e-09	0.0346145	0.104184
9	4290001 - 4300000	4670001 - 4680000	rs10758594	4295583	SIP	rs10974438	9:4291928	1.108e-09	0.0457541	0.639226
9	33930003 - 33940002	34070003 - 34080002	rs56324928	33933138	SIP	rs10453201	9:34050345	2.79e-08	0.0312452	0.989106
9	95497719 - 95507718	96217719 - 96227718	rs28427480	95502660	SIP	rs76340814	9:98321412	7.474e-09	0.0354521	0.260626
9	95497719 - 95507718	96217719 - 96227718	rs16909922	95503619	SIP	rs76340814	9:98321412	8.58e-09	0.0313744	0.260626
9	95497719 - 95507718	96217719 - 96227718	rs60150206	95499941	SIP	rs76340814	9:98321412	8.819e-09	0.0303531	0.263903
9	95497719 - 95507718	96217719 - 96227718	rs60417486	95499896	SIP	rs76340814	9:98321412	7.871e-09	0.0342035	0.263903
9	95497719 - 95507718	95867719 - 95877718	rs28427480	95502660	SIP	rs76340814	9:98321412	7.474e-09	0.0354521	0.260626
9	95497719 - 95507718	95867719 - 95877718	rs16909922	95503619	SIP	rs76340814	9:98321412	8.58e-09	0.0313744	0.260626
9	95497719 - 95507718	95867719 - 95877718	rs60150206	95499941	SIP	rs76340814	9:98321412	8.819e-09	0.0303531	0.263903
9	95497719 - 95507718	95867719 - 95877718	rs60417486	95499896	SIP	rs76340814	9:98321412	7.871e-09	0.0342035	0.263903
9	107637720 - 107642719	108382721 - 108387720	rs7875152	107642502	SIP	rs79895530	9:110416422	1.377e-13	0.0448873	0.894928
9	107637720 - 107647719	108027720 - 108037719	rs7875152	107642502	SIP	rs79895530	9:110416422	1.377e-13	0.0448873	0.894928
9	107637720 - 107647719	107737720 - 107747719	rs7875152	107642502	SIP	rs79895530	9:110416422	1.377e-13	0.0448873	0.894928
9	114147721 - 114157720	114277721 - 114287720	rs72760655	114153934	SIP	rs72760655	9:116916214	1.15816e-12	0.309825	1
9	115577722 - 115587721	116257722 - 116267721	rs1400900375	115580746	SIP	rs1400900375	9:118343026	4.39537e-11	0.318598	1
9	115577722 - 115587721	116257722 - 116267721	rs11451416	115580868	SIP	rs1400900375	9:118343026	2.25006e-10	0.0710285	-
9	115577722 - 115587721	116257722 - 116267721	rs10739455	115580751	SIP	rs1400900375	9:118343026	5.76817e-11	0.244387	-
9	126607722 - 126617721	126777722 - 126787721	rs2275241	126608297	SIP	rs62578126	9:129375338	2.04413e-12	0.111192	0.995764
9	126607722 - 126617721	126777722 - 126787721	rs1336980	126615576	SIP	rs62578126	9:129375338	2.63713e-12	0.0866757	1
9	126607722 - 126617721	126777722 - 126787721	rs12377624	126610831	SIP	rs62578126	9:129375338	1.93645e-12	0.117236	1
9	126607722 - 126617721	126777722 - 126787721	rs62578126	126613059	SIP	rs62578126	9:129375338	1.48999e-12	0.151497	1
9	126607722 - 126617721	126777722 - 126787721	rs10987373	126616951	SIP	rs62578126	9:129375338	4.40879e-12	0.052448	0.995764
9	126607722 - 126612721	126687722 - 126692721	rs2275241	126608297	SIP	rs62578126	9:129375338	2.04413e-12	0.111192	0.995764
9	126607722 - 126612721	126687722 - 126692721	rs12377624	126610831	SIP	rs62578126	9:129375338	1.93645e-12	0.117236	1
9	127127722 - 127132721	127187722 - 127192721	rs10819268	127130178	SIP	rs10465114	9:129917824	1.91714e-08	0.0356162	0.976862
1	183470866 - 183480865	184030867 - 184040866	rs74767794	184036994	SIP	rs1327123	1:184014593	2.30152e-15	0.10887	0.829582
1	183470866 - 183480865	184030867 - 184040866	rs3814333	184037985	SIP	rs1327123	1:184014593	3.35362e-15	0.0752294	0.829582
1	183650866 - 183660865	184060867 - 184070866	rs1952256	184065982	SIP	rs1327123	1:184014593	2.10664e-15	0.115507	0.981979
1	183950867 - 183960866	184030867 - 184040866	rs74767794	184036994	SIP	rs1327123	1:184014593	2.30152e-15	0.10887	0.829582
1	183950867 - 183960866	184030867 - 184040866	rs3814333	184037985	SIP	rs1327123	1:184014593	3.35362e-15	0.0752294	0.829582
1	218326659 - 218336658	219566659 - 219576658	rs2820444	219568478	SIP	rs2605100	1:219644224	1.345e-14	0.0475909	0.449583
1	218716659 - 218726658	219566659 - 219576658	rs2820444	219568478	SIP	rs2605100	1:219644224	1.345e-14	0.0475909	0.449583
11	47173450 - 47178449	47423450 - 47428449	rs4753000	47427134	SIP	rs1631174	11:47974373	2.141e-08	0.0310886	0.503352
11	47173450 - 47178449	47423450 - 47428449	rs7105122	47427993	SIP	rs1631174	11:47974373	2.082e-08	0.0310886	0.499603
11	47173450 - 47178449	47423450 - 47428449	rs7101772	47427827	SIP	rs1631174	11:47974373	2.127e-08	0.0310886	0.503352
11	47173450 - 47178449	47423450 - 47428449	rs7948705	47426404	SIP	rs1631174	11:47974373	2.107e-08	0.0310886	0.503352
11	65537530 - 65542529	65572530 - 65577529	rs67924081	65575510	SIP	rs67924081	11:65342981	2.144e-13	0.171608	1
12	107736224 - 107746223	108216224 - 108226223	rs3764002	108224853	SIP	rs1426371	12:108629780	8.901e-10	0.439237	0.938393
12	123035454 - 123045453	123155454 - 123165453	rs5801505	123163593	SIP	rs753350451	12:123732769	7.926e-10	0.0345384	-
12	123905454 - 123915453	124315455 - 124325454	rs1809889	124316680	SIP	rs1809889	12:124801226	5.701e-14	0.805357	1
12	124035454 - 124045453	124315455 - 124325454	rs1809889	124316680	SIP	rs1809889	12:124801226	5.701e-14	0.805357	1
15	98516772 - 98526771	98626772 - 98631771	rs12901358	98630252	SIP	rs12914479	15:99174828	2.293e-08	0.109948	0.710995
15	98516772 - 98526771	98626772 - 98631771	rs12901681	98630448	SIP	rs12914479	15:99174828	2.093e-08	0.129258	0.928745
15	98516772 - 98526771	98626772 - 98631771	rs12914479	98631599	SIP	rs12914479	15:99174828	7.117e-09	0.306609	1
17	55832640 - 55842639	56772640 - 56782639	rs12602666	56773392	SIP	rs9908159	17:54841961	4.25894e-10	0.14452	1
17	56582640 - 56592639	56772640 - 56782639	rs12602666	56773392	SIP	rs9908159	17:54841961	4.25894e-10	0.14452	1
17	69383860 - 69393859	69503860 - 69513859	rs2716212	69507512	SIP	rs2716212	17:67503653	3.56e-10	0.312127	1
17	69383860 - 69393859	69503860 - 69513859	rs2521349	69507360	SIP	rs2716212	17:67503653	3.637e-10	0.295152	1
19	10569325 - 10579324	10644325 - 10649324	rs1975163	10645723	SIP	rs10405617	19:10752968	1.15438e-10	0.0568143	1
19	10569325 - 10579324	10644325 - 10649324	rs10408721	10647643	SIP	rs10405617	19:10752968	1.77905e-10	0.0372387	0.945915
2	105788544 - 105793543	106063545 - 106073544	rs13014521	106071000	SIP	rs66989638	2:106689736	3.287e-10	0.108067	0.973046
2	105788544 - 105793543	106063545 - 106073544	rs66989638	106073280	SIP	rs66989638	2:106689736	3.311e-11	0.891765	1
2	203270278 - 203275277	203435278 - 203445277	rs55881728	203441633	SIP	rs62182810	2:204387482	8.714e-09	0.0367355	0.803471
22	26754038 - 26764037	27804013 - 27814012	rs13057169	27810971	SIP	rs11705555	22:28206912	1.836e-08	0.0413635	0.944523
22	26754038 - 26764037	27804013 - 27814012	rs11703195	27811642	SIP	rs11705555	22:28206912	2.962e-09	0.230451	0.994388
22	26754038 - 26764037	27804013 - 27814012	rs11704137	27812540	SIP	rs11705555	22:28206912	3.694e-09	0.187415	0.994405
22	26754038 - 26764037	27804013 - 27814012	rs11704274	27812741	SIP	rs11705555	22:28206912	3.132e-09	0.230451	0.994405
22	26754038 - 26764037	27804013 - 27814012	rs11705555	27810924	SIP	rs11705555	22:28206912	2.993e-09	0.230451	1
22	26764038 - 26774037	27804013 - 27814012	rs13057169	27810971	SIP	rs11705555	22:28206912	1.836e-08	0.0413635	0.944523
22	26764038 - 26774037	27804013 - 27814012	rs11703195	27811642	SIP	rs11705555	22:28206912	2.962e-09	0.230451	0.994388
22	26764038 - 26774037	27804013 - 27814012	rs11704137	27812540	SIP	rs11705555	22:28206912	3.694e-09	0.187415	0.994405
22	26764038 - 26774037	27804013 - 27814012	rs11704274	27812741	SIP	rs11705555	22:28206912	3.132e-09	0.230451	0.994405
22	26764038 - 26774037	27804013 - 27814012	rs11705555	27810924	SIP	rs11705555	22:28206912	2.993e-09	0.230451	1
22	26894038 - 26904037	27804013 - 27814012	rs13057169	27810971	SIP	rs11705555	22:28206912	1.836e-08	0.0413635	0.944523
22	26894038 - 26904037	27804013 - 27814012	rs11703195	27811642	SIP	rs11705555	22:28206912	2.962e-09	0.230451	0.994388
22	26894038 - 26904037	27804013 - 27814012	rs11704137	27812540	SIP	rs11705555	22:28206912	3.694e-09	0.187415	0.994405
22	26894038 - 26904037	27804013 - 27814012	rs11704274	27812741	SIP	rs11705555	22:28206912	3.132e-09	0.230451	0.994405
22	26894038 - 26904037	27804013 - 27814012	rs11705555	27810924	SIP	rs11705555	22:28206912	2.993e-09	0.230451	1
22	27309040 - 27314039	27804013 - 27814012	rs13057169	27810971	SIP	rs11705555	22:28206912	1.836e-08	0.0413635	0.944523
22	27309040 - 27314039	27804013 - 27814012	rs11703195	27811642	SIP	rs11705555	22:28206912	2.962e-09	0.230451	0.994388
22	27309040 - 27314039	27804013 - 27814012	rs11704137	27812540	SIP	rs11705555	22:28206912	3.694e-09	0.187415	0.994405
22	27309040 - 27314039	27804013 - 27814012	rs11704274	27812741	SIP	rs11705555	22:28206912	3.132e-09	0.230451	0.994405
22	27309040 - 27314039	27804013 - 27814012	rs11705555	27810924	SIP	rs11705555	22:28206912	2.993e-09	0.230451	1
22	37313960 - 37323959	37783994 - 37788993	rs13055462	37788678	SIP	rs12160491	22:38195796	3.856e-10	0.037293	0.92524
22	37313960 - 37323959	37783994 - 37788993	rs13056052	37788865	SIP	rs12160491	22:38195796	4.29e-10	0.0335392	0.92524
22	37313960 - 37323959	37783994 - 37788993	rs8136037	37787990	SIP	rs12160491	22:38195796	3.953e-10	0.035365	0.92524
3	11128315 - 11138314	11598527 - 11608526	rs2117870	11600803	SIP	rs2276749	3:11643465	5.162e-09	0.0499327	0.977704
3	11128315 - 11138314	11598527 - 11608526	rs2276749	11601991	SIP	rs2276749	3:11643465	3.34e-09	0.0774542	1
3	11128315 - 11138314	11598527 - 11608526	rs6786146	11604241	SIP	rs2276749	3:11643465	4.103e-09	0.0585811	0.977704
3	11128315 - 11138314	11598527 - 11608526	rs6799718	11600785	SIP	rs2276749	3:11643465	4.094e-09	0.0627464	-
3	11128315 - 11138314	11598527 - 11608526	rs6810015	11604111	SIP	rs2276749	3:11643465	4.793e-09	0.0534658	0.977704
3	11128315 - 11138314	11598527 - 11608526	rs12633581	11601220	SIP	rs2276749	3:11643465	4.128e-09	0.0613251	0.977704
3	11378527 - 11388526	11598527 - 11603526	rs2117870	11600803	SIP	rs2276749	3:11643465	5.162e-09	0.0499327	0.977704
3	11378527 - 11388526	11598527 - 11603526	rs2276749	11601991	SIP	rs2276749	3:11643465	3.34e-09	0.0774542	1
3	11378527 - 11388526	11598527 - 11603526	rs6799718	11600785	SIP	rs2276749	3:11643465	4.094e-09	0.0627464	-
3	11378527 - 11388526	11598527 - 11603526	rs12633581	11601220	SIP	rs2276749	3:11643465	4.128e-09	0.0613251	0.977704
3	187742213 - 187752212	188572213 - 188582212	rs758236099	188579521	SIP	rs747952496	3:188311659	6.88415e-10	0.0608397	-
3	188262213 - 188272212	188572213 - 188582212	rs758236099	188579521	SIP	rs747952496	3:188311659	6.88415e-10	0.0608397	-
3	188292213 - 188297212	188577213 - 188582212	rs758236099	188579521	SIP	rs747952496	3:188311659	6.88415e-10	0.0608397	-
3	188462213 - 188472212	188577213 - 188582212	rs758236099	188579521	SIP	rs747952496	3:188311659	6.88415e-10	0.0608397	-
4	99998844 - 100008843	102258844 - 102268843	rs13107325	102267552	SIP	rs13107325	4:103188709	3.248e-17	0.963611	1
4	100418844 - 100423843	102258844 - 102268843	rs13107325	102267552	SIP	rs13107325	4:103188709	3.248e-17	0.963611	1
4	100603844 - 100608843	102258844 - 102268843	rs13107325	102267552	SIP	rs13107325	4:103188709	3.248e-17	0.963611	1
4	100898844 - 100908843	102258844 - 102268843	rs13107325	102267552	SIP	rs13107325	4:103188709	3.248e-17	0.963611	1
4	101048844 - 101058843	102258844 - 102268843	rs13107325	102267552	SIP	rs13107325	4:103188709	3.248e-17	0.963611	1
4	101168844 - 101178843	102258844 - 102268843	rs13107325	102267552	SIP	rs13107325	4:103188709	3.248e-17	0.963611	1
4	101328844 - 101338843	102258844 - 102268843	rs13107325	102267552	SIP	rs13107325	4:103188709	3.248e-17	0.963611	1
4	101348844 - 101358843	102263844 - 102268843	rs13107325	102267552	SIP	rs13107325	4:103188709	3.248e-17	0.963611	1
4	101768844 - 101773843	102258844 - 102268843	rs13107325	102267552	SIP	rs13107325	4:103188709	3.248e-17	0.963611	1
4	144168848 - 144178847	145058849 - 145068848	rs79953717	145065593	SIP	rs75686861	4:145621328	7.674e-08	0.0352585	0.00214199
4	144443849 - 144448848	145058849 - 145068848	rs79953717	145065593	SIP	rs75686861	4:145621328	7.674e-08	0.0352585	0.00214199
4	144508849 - 144513848	145058849 - 145068848	rs79953717	145065593	SIP	rs75686861	4:145621328	7.674e-08	0.0352585	0.00214199
4	144588849 - 144593848	145058849 - 145068848	rs79953717	145065593	SIP	rs75686861	4:145621328	7.674e-08	0.0352585	0.00214199
4	144678849 - 144688848	145058849 - 145068848	rs79953717	145065593	SIP	rs75686861	4:145621328	7.674e-08	0.0352585	0.00214199
5	127554309 - 127564308	128674308 - 128684307	rs17615906	128682720	SIP	rs17615906	5:128018413	3.757e-11	0.166219	1
5	127554309 - 127564308	128674308 - 128684307	rs17677724	128679677	SIP	rs17615906	5:128018413	5.869e-11	0.0995121	0.837618
5	141980436 - 141990435	142420436 - 142430435	rs6861056	142425850	SIP	rs10062749	5:141805088	2.61e-08	0.0323203	0.955095
5	141980436 - 141990435	142420436 - 142430435	rs10062749	142425523	SIP	rs10062749	5:141805088	2.041e-09	0.368769	1
5	141980436 - 141990435	142420436 - 142430435	rs10076308	142425104	SIP	rs10062749	5:141805088	2.354e-09	0.337862	1
5	141980436 - 141990435	142420436 - 142430435	rs28538668	142425735	SIP	rs10062749	5:141805088	2.383e-08	0.0350883	0.955095
5	142245436 - 142250435	142425436 - 142430435	rs6861056	142425850	SIP	rs10062749	5:141805088	2.61e-08	0.0323203	0.955095
5	142245436 - 142250435	142425436 - 142430435	rs10062749	142425523	SIP	rs10062749	5:141805088	2.041e-09	0.368769	1
5	142245436 - 142250435	142425436 - 142430435	rs28538668	142425735	SIP	rs10062749	5:141805088	2.383e-08	0.0350883	0.955095
6	32412224 - 32422223	33082224 - 33092223	rs9277369	33082367	SIP	rs2856821	6:33046742	2.146e-08	0.0374901	0.683399
6	32412224 - 32422223	33082224 - 33092223	rs9277552	33087724	SIP	rs2856821	6:33046742	7.141e-09	0.0946852	0.906933
6	33012224 - 33022223	33087224 - 33092223	rs9277552	33087724	SIP	rs2856821	6:33046742	7.141e-09	0.0946852	0.906933
6	72860278 - 72870277	75450285 - 75460284	rs12209223	75454873	SIP	rs12209223	6:76164589	1.921e-29	0.853174	1
6	74600285 - 74610284	75450285 - 75460284	rs12209223	75454873	SIP	rs12209223	6:76164589	1.921e-29	0.853174	1
7	101686721 - 101696720	102226721 - 102236720	rs113484852	102231061	SIP	rs116934101	7:101775597	1.469e-08	0.0487563	0.822896
7	101816721 - 101821720	102226721 - 102236720	rs113484852	102231061	SIP	rs116934101	7:101775597	1.469e-08	0.0487563	0.822896
7	129210160 - 129220159	129290160 - 129300159	rs560613515	129293284	SIP	rs143083812	7:128843410	9.641e-10	0.076928	-
8	125697757 - 125707756	129717755 - 129727754	rs2062078	129722215	SIP	rs11984666	8:130730280	2.987e-15	0.032547	1
8	125697757 - 125707756	129717755 - 129727754	rs4733725	129719130	SIP	rs11984666	8:130730280	1.693e-15	0.0692796	1
8	125697757 - 125707756	129717755 - 129727754	rs4733726	129719156	SIP	rs11984666	8:130730280	2.131e-15	0.0488299	1
8	125697757 - 125707756	129717755 - 129727754	rs7815298	129720493	SIP	rs11984666	8:130730280	3.011e-15	0.032547	1
8	125697757 - 125707756	129717755 - 129727754	rs10956490	129718998	SIP	rs11984666	8:130730280	2.127e-15	0.0488299	1
8	125697757 - 125707756	129717755 - 129727754	rs11984666	129718034	SIP	rs11984666	8:130730280	1.689e-15	0.0692796	1
8	125697757 - 125707756	129717755 - 129727754	rs60228607	129723214	SIP	rs11984666	8:130730280	3.212e-15	0.0307211	1
8	125697757 - 125707756	129717755 - 129727754	rs765002298	129721601	SIP	rs11984666	8:130730280	3.115e-15	0.0307583	-
8	126822756 - 126827755	129722755 - 129727754	rs60228607	129723214	SIP	rs11984666	8:130730280	3.212e-15	0.0307211	1
8	126872756 - 126877755	129722755 - 129727754	rs60228607	129723214	SIP	rs11984666	8:130730280	3.212e-15	0.0307211	1
9	3520001 - 3530000	4290001 - 4300000	rs10974438	4291928	SIP	rs10974438	9:4291928	7.39e-11	0.728404	1
9	3520001 - 3530000	4290001 - 4300000	rs10814915	4290544	SIP	rs10974438	9:4291928	8.129e-10	0.0556886	0.648054
9	3520001 - 3530000	4290001 - 4300000	rs12350099	4298576	SIP	rs10974438	9:4291928	2.075e-09	0.0346145	0.104184
9	3520001 - 3530000	4290001 - 4300000	rs10758594	4295583	SIP	rs10974438	9:4291928	1.108e-09	0.0457541	0.639226
9	3870001 - 3880000	4290001 - 4300000	rs10974438	4291928	SIP	rs10974438	9:4291928	7.39e-11	0.728404	1
9	3870001 - 3880000	4290001 - 4300000	rs10814915	4290544	SIP	rs10974438	9:4291928	8.129e-10	0.0556886	0.648054
9	3870001 - 3880000	4290001 - 4300000	rs12350099	4298576	SIP	rs10974438	9:4291928	2.075e-09	0.0346145	0.104184
9	3870001 - 3880000	4290001 - 4300000	rs10758594	4295583	SIP	rs10974438	9:4291928	1.108e-09	0.0457541	0.639226
9	4140001 - 4150000	4290001 - 4300000	rs10974438	4291928	SIP	rs10974438	9:4291928	7.39e-11	0.728404	1
9	4140001 - 4150000	4290001 - 4300000	rs10814915	4290544	SIP	rs10974438	9:4291928	8.129e-10	0.0556886	0.648054
9	4140001 - 4150000	4290001 - 4300000	rs12350099	4298576	SIP	rs10974438	9:4291928	2.075e-09	0.0346145	0.104184
9	4140001 - 4150000	4290001 - 4300000	rs10758594	4295583	SIP	rs10974438	9:4291928	1.108e-09	0.0457541	0.639226
9	114107721 - 114112720	114152721 - 114157720	rs72760655	114153934	SIP	rs72760655	9:116916214	1.15816e-12	0.309825	1
9	114407721 - 114417720	115527722 - 115537721	rs4979549	115528818	SIP	rs1400900375	9:118343026	2.52416e-10	0.0635002	-
9	114657721 - 114667720	115517722 - 115527721	rs6478182	115527482	SIP	rs1400900375	9:118343026	2.27721e-10	0.0701964	-
9	114677721 - 114682720	115527722 - 115532721	rs4979549	115528818	SIP	rs1400900375	9:118343026	2.52416e-10	0.0635002	-
9	114737721 - 114747720	115517722 - 115527721	rs6478182	115527482	SIP	rs1400900375	9:118343026	2.27721e-10	0.0701964	-
9	114907721 - 114917720	115517722 - 115527721	rs6478182	115527482	SIP	rs1400900375	9:118343026	2.27721e-10	0.0701964	-
9	115027722 - 115037721	115517722 - 115527721	rs6478182	115527482	SIP	rs1400900375	9:118343026	2.27721e-10	0.0701964	-
9	115097722 - 115107721	115517722 - 115527721	rs6478182	115527482	SIP	rs1400900375	9:118343026	2.27721e-10	0.0701964	-
9	115207722 - 115217721	115517722 - 115527721	rs6478182	115527482	SIP	rs1400900375	9:118343026	2.27721e-10	0.0701964	-
9	115587722 - 115597721	116567722 - 116577721	rs10759850	116576204	SIP	rs1321917	9:119324929	5.82384e-18	0.0657441	0.940583
9	115687722 - 115697721	116567722 - 116577721	rs10759850	116576204	SIP	rs1321917	9:119324929	5.82384e-18	0.0657441	0.940583
9	115877722 - 115887721	116567722 - 116577721	rs10759850	116576204	SIP	rs1321917	9:119324929	5.82384e-18	0.0657441	0.940583
9	116147722 - 116157721	116567722 - 116577721	rs10759850	116576204	SIP	rs1321917	9:119324929	5.82384e-18	0.0657441	0.940583
9	116367722 - 116377721	116547722 - 116557721	rs1407243	116552572	SIP	rs1321917	9:119324929	3.14866e-18	0.12046	1
9	116367722 - 116377721	116547722 - 116557721	rs1895062	116551207	SIP	rs1321917	9:119324929	1.76179e-18	0.213395	0.9919
1	102990000 - 103000000	103530000 - 103540000	rs11164653	102998654	Mustache	rs11164653	1:103464210	2.769e-18	0.382867	1
1	118210000 - 118215000	118820000 - 118825000	rs4411121	118214411	Mustache	rs4411121	1:118757034	2.161e-11	0.228046	1
1	118210000 - 118220000	119000000 - 119010000	rs4411121	118214411	Mustache	rs4411121	1:118757034	2.161e-11	0.228046	1
1	150300000 - 150310000	151160000 - 151170000	rs10623734	150306311	Mustache	rs78390735	1:150214028	1.245e-08	0.0317025	-
1	183925000 - 183930000	184050000 - 184055000	rs7522001	183929656	Mustache	rs10797923	1:183901966	1.94708e-07	0.0420661	0.976771
1	183930000 - 183940000	184690000 - 184700000	rs11583641	183937111	Mustache	rs10797923	1:183901966	1.32943e-07	0.0633085	0.809227
1	183930000 - 183940000	184690000 - 184700000	rs10797923	183932832	Mustache	rs10797923	1:183901966	7.67417e-08	0.104446	1
1	183930000 - 183940000	184690000 - 184700000	rs10911472	183939679	Mustache	rs10797923	1:183901966	8.8565e-08	0.0937217	0.814266
1	227735000 - 227740000	228080000 - 228085000	rs11588850	227739541	Mustache	rs11588850	1:227927242	3.528e-10	0.391126	1
1	227735000 - 227740000	228155000 - 228160000	rs11588850	227739541	Mustache	rs11588850	1:227927242	3.528e-10	0.391126	1
1	227760000 - 227770000	227940000 - 227950000	rs11580196	227767575	Mustache	rs11588850	1:227927242	6.739e-10	0.231308	1
11	47930000 - 47940000	48100000 - 48110000	rs1227995	47938658	Mustache	rs1631174	11:47974373	1.458e-08	0.0335532	0.995545
11	47935000 - 47940000	47980000 - 47985000	rs1227995	47938658	Mustache	rs1631174	11:47974373	1.458e-08	0.0335532	0.995545
11	96060000 - 96065000	96150000 - 96155000	rs10831474	96063125	Mustache	rs10831475	11:95796907	1.959e-11	0.117463	0.972462
11	96060000 - 96065000	96150000 - 96155000	rs10831475	96063743	Mustache	rs10831475	11:95796907	5.887e-12	0.280581	1
11	96060000 - 96065000	96150000 - 96155000	rs10831476	96063746	Mustache	rs10831475	11:95796907	5.887e-12	0.280581	1
11	96060000 - 96065000	96150000 - 96155000	rs10831477	96063947	Mustache	rs10831475	11:95796907	6.037e-12	0.263518	1
12	14900000 - 14905000	15885000 - 15890000	rs7294636	14901082	Mustache	rs7294636	12:15054016	2.992e-16	0.040738	1
12	58900000 - 58910000	59120000 - 59130000	rs10877185	58904205	Mustache	rs17120227	12:59289349	3.062e-12	0.0765869	0.902712
12	58900000 - 58910000	59120000 - 59130000	rs1020031	58901672	Mustache	rs17120227	12:59289349	5.221e-12	0.038228	0.922052
12	58900000 - 58910000	59120000 - 59130000	rs11172811	58901935	Mustache	rs17120227	12:59289349	4.763e-12	0.048422	0.922052
12	58900000 - 58910000	59120000 - 59130000	rs11172812	58902502	Mustache	rs17120227	12:59289349	4.014e-12	0.0546652	0.902712
12	58900000 - 58910000	59120000 - 59130000	rs11172817	58904326	Mustache	rs17120227	12:59289349	4.578e-12	0.0431069	0.922052
12	58900000 - 58910000	59120000 - 59130000	rs11172818	58904509	Mustache	rs17120227	12:59289349	4.462e-12	0.051447	0.902712
12	58900000 - 58910000	59120000 - 59130000	rs2167030	58901891	Mustache	rs17120227	12:59289349	4.554e-12	0.051447	0.922052
12	93740000 - 93745000	94090000 - 94095000	rs7953280	93742233	Mustache	rs7953280	12:94136009	4.835e-12	0.0772942	1
12	93770000 - 93780000	94080000 - 94090000	rs2171126	93773444	Mustache	rs7953280	12:94136009	6.062e-12	0.0492308	0.788134
12	108220000 - 108230000	108470000 - 108480000	rs3764002	108224853	Mustache	rs1426371	12:108629780	8.901e-10	0.439237	0.938393
12	123360000 - 123370000	123580000 - 123590000	rs7485502	123364549	Mustache	rs753350451	12:123732769	7.073e-10	0.0385468	-
13	42380000 - 42390000	43850000 - 43860000	rs58973023	42384997	Mustache	rs58973023	13:42959133	4.715e-10	0.728335	1
15	62770000 - 62780000	63100000 - 63110000	rs74852393	62775235	Mustache	rs74852393	15:63067433	8.192e-12	0.999933	1
15	62775000 - 62780000	63405000 - 63410000	rs74852393	62775235	Mustache	rs74852393	15:63067433	8.192e-12	0.999933	1
16	53770000 - 53780000	55260000 - 55270000	rs1121980	53775335	Mustache	rs9940278	16:53800200	2.223e-18	0.0402028	1
16	53770000 - 53780000	55260000 - 55270000	rs55872725	53775211	Mustache	rs9940278	16:53800200	3.349e-18	0.0463948	0.956547
16	53770000 - 53780000	54920000 - 54930000	rs1121980	53775335	Mustache	rs9940278	16:53800200	2.223e-18	0.0402028	1
16	53770000 - 53780000	54920000 - 54930000	rs55872725	53775211	Mustache	rs9940278	16:53800200	3.349e-18	0.0463948	0.956547
19	10645000 - 10650000	10870000 - 10875000	rs1975163	10645723	Mustache	rs10405617	19:10752968	1.15438e-10	0.0568143	1
19	10645000 - 10650000	10870000 - 10875000	rs10408721	10647643	Mustache	rs10405617	19:10752968	1.77905e-10	0.0372387	0.945915
19	45880000 - 45890000	47250000 - 47260000	rs8112559	45887197	Mustache	rs8112559	19:46390455	7.317e-11	0.308911	1
19	45880000 - 45890000	47250000 - 47260000	rs8112972	45887347	Mustache	rs8112559	19:46390455	1.163e-10	0.200972	0.989288
19	45880000 - 45890000	47250000 - 47260000	rs11550348	45884086	Mustache	rs8112559	19:46390455	9.071e-11	0.279626	1
19	45880000 - 45890000	46000000 - 46010000	rs8112559	45887197	Mustache	rs8112559	19:46390455	7.317e-11	0.308911	1
19	45880000 - 45890000	46000000 - 46010000	rs8112972	45887347	Mustache	rs8112559	19:46390455	1.163e-10	0.200972	0.989288
19	45880000 - 45890000	46000000 - 46010000	rs11550348	45884086	Mustache	rs8112559	19:46390455	9.071e-11	0.279626	1
2	203440000 - 203445000	203810000 - 203815000	rs55881728	203441633	Mustache	rs62182810	2:204387482	8.714e-09	0.0367355	0.803471
21	38645000 - 38650000	39180000 - 39185000	rs9981408	38645522	Mustache	rs9981408	21:40017446	1.81986e-12	0.402279	1
21	38645000 - 38650000	39180000 - 39185000	rs9976018	38647205	Mustache	rs9981408	21:40017446	4.67498e-12	0.16003	0.987822
21	38645000 - 38650000	39180000 - 39185000	rs9976458	38647549	Mustache	rs9981408	21:40017446	5.15529e-12	0.147299	0.969705
22	27810000 - 27815000	27865000 - 27870000	rs13057169	27810971	Mustache	rs11705555	22:28206912	1.836e-08	0.0413635	0.944523
22	27810000 - 27815000	27865000 - 27870000	rs11703195	27811642	Mustache	rs11705555	22:28206912	2.962e-09	0.230451	0.994388
22	27810000 - 27815000	27865000 - 27870000	rs11704137	27812540	Mustache	rs11705555	22:28206912	3.694e-09	0.187415	0.994405
22	27810000 - 27815000	27865000 - 27870000	rs11704274	27812741	Mustache	rs11705555	22:28206912	3.132e-09	0.230451	0.994405
22	27810000 - 27815000	27865000 - 27870000	rs11705555	27810924	Mustache	rs11705555	22:28206912	2.993e-09	0.230451	1
3	11600000 - 11605000	11640000 - 11645000	rs2117870	11600803	Mustache	rs2276749	3:11643465	5.162e-09	0.0499327	0.977704
3	11600000 - 11605000	11640000 - 11645000	rs2276749	11601991	Mustache	rs2276749	3:11643465	3.34e-09	0.0774542	1
3	11600000 - 11605000	11640000 - 11645000	rs6786146	11604241	Mustache	rs2276749	3:11643465	4.103e-09	0.0585811	0.977704
3	11600000 - 11605000	11640000 - 11645000	rs6799718	11600785	Mustache	rs2276749	3:11643465	4.094e-09	0.0627464	-
3	11600000 - 11605000	11640000 - 11645000	rs6810015	11604111	Mustache	rs2276749	3:11643465	4.793e-09	0.0534658	0.977704
3	11600000 - 11605000	11640000 - 11645000	rs12633581	11601220	Mustache	rs2276749	3:11643465	4.128e-09	0.0613251	0.977704
4	1710000 - 1720000	2240000 - 2250000	rs2236786	1717567	Mustache	rs1530586	4:1760927	1.801e-13	0.0303651	0.918641
4	1715000 - 1720000	1860000 - 1865000	rs2236786	1717567	Mustache	rs1530586	4:1760927	1.801e-13	0.0303651	0.918641
5	68530000 - 68535000	68710000 - 68715000	rs1423232	68533051	Mustache	rs56132153	5:67825133	6.716e-09	0.05442	0.971179
5	68530000 - 68535000	68710000 - 68715000	rs7704228	68530907	Mustache	rs56132153	5:67825133	9.727e-09	0.0475991	0.891576
5	68530000 - 68535000	68710000 - 68715000	rs34485661	68532398	Mustache	rs56132153	5:67825133	9.88e-09	0.0380206	0.983312
5	68530000 - 68535000	68710000 - 68715000	rs28562175	68531629	Mustache	rs56132153	5:67825133	8.81e-09	0.0397168	0.891576
5	68530000 - 68535000	68960000 - 68965000	rs1423232	68533051	Mustache	rs56132153	5:67825133	6.716e-09	0.05442	0.971179
5	68530000 - 68535000	68960000 - 68965000	rs7704228	68530907	Mustache	rs56132153	5:67825133	9.727e-09	0.0475991	0.891576
5	68530000 - 68535000	68960000 - 68965000	rs34485661	68532398	Mustache	rs56132153	5:67825133	9.88e-09	0.0380206	0.983312
5	68530000 - 68535000	68960000 - 68965000	rs28562175	68531629	Mustache	rs56132153	5:67825133	8.81e-09	0.0397168	0.891576
5	128510000 - 128520000	128840000 - 128850000	rs17677555	128516919	Mustache	rs17615906	5:128018413	9.961e-11	0.0587191	0.465704
5	128670000 - 128680000	128830000 - 128840000	rs17677724	128679677	Mustache	rs17615906	5:128018413	5.869e-11	0.0995121	0.837618
5	142425000 - 142430000	142545000 - 142550000	rs6861056	142425850	Mustache	rs10062749	5:141805088	2.61e-08	0.0323203	0.955095
5	142425000 - 142430000	142545000 - 142550000	rs10062749	142425523	Mustache	rs10062749	5:141805088	2.041e-09	0.368769	1
5	142425000 - 142430000	142545000 - 142550000	rs10076308	142425104	Mustache	rs10062749	5:141805088	2.354e-09	0.337862	1
5	142425000 - 142430000	142545000 - 142550000	rs28538668	142425735	Mustache	rs10062749	5:141805088	2.383e-08	0.0350883	0.955095
5	171430000 - 171440000	171600000 - 171610000	rs4073716	171437235	Mustache	rs3884606	5:170871074	5.474e-09	0.0913655	0.799248
5	171430000 - 171440000	171600000 - 171610000	rs4074237	171436649	Mustache	rs3884606	5:170871074	3.251e-09	0.147847	0.781344
5	171430000 - 171440000	171600000 - 171610000	rs4076077	171436505	Mustache	rs3884606	5:170871074	3.275e-09	0.147847	0.781344
6	18390000 - 18400000	18480000 - 18490000	rs1886248	18399163	Mustache	rs9396861	6:18404133	1.978e-10	0.299687	0.618163
6	18395000 - 18400000	18435000 - 18440000	rs1886248	18399163	Mustache	rs9396861	6:18404133	1.978e-10	0.299687	0.618163
6	35140000 - 35150000	35220000 - 35230000	rs2038740	35146765	Mustache	rs2038740	6:35114542	6.195e-10	0.337959	1
6	35140000 - 35150000	35220000 - 35230000	rs9394274	35147134	Mustache	rs2038740	6:35114542	6.201e-10	0.337959	1
6	35145000 - 35150000	35240000 - 35245000	rs2038740	35146765	Mustache	rs2038740	6:35114542	6.195e-10	0.337959	1
6	35145000 - 35150000	35240000 - 35245000	rs9394274	35147134	Mustache	rs2038740	6:35114542	6.201e-10	0.337959	1
6	35145000 - 35150000	35200000 - 35205000	rs2038740	35146765	Mustache	rs2038740	6:35114542	6.195e-10	0.337959	1
6	35145000 - 35150000	35200000 - 35205000	rs9394274	35147134	Mustache	rs2038740	6:35114542	6.201e-10	0.337959	1
9	4290000 - 4300000	5620000 - 5630000	rs10974438	4291928	Mustache	rs10974438	9:4291928	7.39e-11	0.728404	1
9	4290000 - 4300000	5620000 - 5630000	rs10814915	4290544	Mustache	rs10974438	9:4291928	8.129e-10	0.0556886	0.648054
9	4290000 - 4300000	5620000 - 5630000	rs12350099	4298576	Mustache	rs10974438	9:4291928	2.075e-09	0.0346145	0.104184
9	4290000 - 4300000	5620000 - 5630000	rs10758594	4295583	Mustache	rs10974438	9:4291928	1.108e-09	0.0457541	0.639226
9	95450000 - 95455000	96215000 - 96220000	rs2282043	95450326	Mustache	rs76340814	9:98321412	6.117e-09	0.0417766	0.274147
9	95450000 - 95455000	96215000 - 96220000	rs75259420	95452903	Mustache	rs76340814	9:98321412	8.098e-09	0.0303531	0.274147
9	95450000 - 95455000	96215000 - 96220000	rs28583690	95453349	Mustache	rs76340814	9:98321412	7.81e-09	0.0380146	0.267248
9	95500000 - 95510000	96210000 - 96220000	rs28427480	95502660	Mustache	rs76340814	9:98321412	7.474e-09	0.0354521	0.260626
9	95500000 - 95510000	96210000 - 96220000	rs16909922	95503619	Mustache	rs76340814	9:98321412	8.58e-09	0.0313744	0.260626
9	95500000 - 95510000	96040000 - 96050000	rs28427480	95502660	Mustache	rs76340814	9:98321412	7.474e-09	0.0354521	0.260626
9	95500000 - 95510000	96040000 - 96050000	rs16909922	95503619	Mustache	rs76340814	9:98321412	8.58e-09	0.0313744	0.260626
9	107640000 - 107650000	107930000 - 107940000	rs7875152	107642502	Mustache	rs79895530	9:110416422	1.377e-13	0.0448873	0.894928
9	107640000 - 107645000	108385000 - 108390000	rs7875152	107642502	Mustache	rs79895530	9:110416422	1.377e-13	0.0448873	0.894928
9	107640000 - 107650000	107730000 - 107740000	rs7875152	107642502	Mustache	rs79895530	9:110416422	1.377e-13	0.0448873	0.894928
9	114165000 - 114170000	114225000 - 114230000	rs737142	114167047	Mustache	rs72760655	9:116916214	2.36827e-12	0.15144	0.916502
9	115580000 - 115590000	116850000 - 116860000	rs1400900375	115580746	Mustache	rs1400900375	9:118343026	4.39537e-11	0.318598	1
9	115580000 - 115590000	116850000 - 116860000	rs11451416	115580868	Mustache	rs1400900375	9:118343026	2.25006e-10	0.0710285	-
9	115580000 - 115590000	116850000 - 116860000	rs10739455	115580751	Mustache	rs1400900375	9:118343026	5.76817e-11	0.244387	-
9	115580000 - 115590000	116660000 - 116670000	rs1400900375	115580746	Mustache	rs1400900375	9:118343026	4.39537e-11	0.318598	1
9	115580000 - 115590000	116660000 - 116670000	rs11451416	115580868	Mustache	rs1400900375	9:118343026	2.25006e-10	0.0710285	-
9	115580000 - 115590000	116660000 - 116670000	rs10739455	115580751	Mustache	rs1400900375	9:118343026	5.76817e-11	0.244387	-
9	126610000 - 126615000	126695000 - 126700000	rs12377624	126610831	Mustache	rs62578126	9:129375338	1.93645e-12	0.117236	1
9	126610000 - 126615000	126695000 - 126700000	rs62578126	126613059	Mustache	rs62578126	9:129375338	1.48999e-12	0.151497	1
9	126610000 - 126620000	126780000 - 126790000	rs1336980	126615576	Mustache	rs62578126	9:129375338	2.63713e-12	0.0866757	1
9	126610000 - 126620000	126780000 - 126790000	rs12377624	126610831	Mustache	rs62578126	9:129375338	1.93645e-12	0.117236	1
9	126610000 - 126620000	126780000 - 126790000	rs62578126	126613059	Mustache	rs62578126	9:129375338	1.48999e-12	0.151497	1
9	126610000 - 126620000	126780000 - 126790000	rs10987373	126616951	Mustache	rs62578126	9:129375338	4.40879e-12	0.052448	0.995764
1	182610000 - 182620000	183970000 - 183980000	rs4651159	183972030	Mustache	rs10797923	1:183901966	2.3773e-07	0.0346985	0.00425939
1	182610000 - 182620000	183970000 - 183980000	rs4651160	183972068	Mustache	rs10797923	1:183901966	2.39112e-07	0.0345063	0.00425939
1	183650000 - 183660000	184050000 - 184060000	rs2274432	184051811	Mustache	rs1327123	1:184014593	5.31371e-15	0.0465966	0.981979
1	183650000 - 183660000	184050000 - 184060000	rs10797938	184050820	Mustache	rs1327123	1:184014593	5.33043e-15	0.0464534	0.99549
1	183650000 - 183660000	184050000 - 184060000	rs1046934	184054395	Mustache	rs1327123	1:184014593	2.19562e-15	0.110914	0.981979
1	183925000 - 183930000	184050000 - 184055000	rs2274432	184051811	Mustache	rs1327123	1:184014593	5.31371e-15	0.0465966	0.981979
1	183925000 - 183930000	184050000 - 184055000	rs10797938	184050820	Mustache	rs1327123	1:184014593	5.33043e-15	0.0464534	0.99549
1	183925000 - 183930000	184050000 - 184055000	rs1046934	184054395	Mustache	rs1327123	1:184014593	2.19562e-15	0.110914	0.981979
1	183950000 - 183960000	184040000 - 184050000	rs12029527	184044184	Mustache	rs1327123	1:184014593	6.47897e-15	0.038338	0.964021
1	183950000 - 183960000	184040000 - 184050000	rs10797937	184047997	Mustache	rs1327123	1:184014593	5.07786e-15	0.048696	0.99549
1	183950000 - 183960000	184040000 - 184050000	rs1327123	184045459	Mustache	rs1327123	1:184014593	2.22972e-15	0.10925	1
1	183950000 - 183960000	184040000 - 184050000	rs12047271	184044357	Mustache	rs1327123	1:184014593	4.00487e-15	0.0614784	0.964021
1	183950000 - 183960000	184040000 - 184050000	rs12044334	184044697	Mustache	rs1327123	1:184014593	4.66463e-15	0.0529277	0.959555
1	183950000 - 183960000	184040000 - 184050000	rs4650650	184043707	Mustache	rs1327123	1:184014593	5.88299e-15	0.0421479	0.964021
1	183950000 - 183960000	184040000 - 184050000	rs1926872	184049341	Mustache	rs1327123	1:184014593	5.45778e-15	0.0453654	0.99549
1	183990000 - 183995000	184035000 - 184040000	rs74767794	184036994	Mustache	rs1327123	1:184014593	2.30152e-15	0.10887	0.829582
1	183990000 - 183995000	184035000 - 184040000	rs3814333	184037985	Mustache	rs1327123	1:184014593	3.35362e-15	0.0752294	0.829582
1	219070000 - 219075000	219565000 - 219570000	rs2820444	219568478	Mustache	rs2605100	1:219644224	1.345e-14	0.0475909	0.449583
1	219190000 - 219200000	219560000 - 219570000	rs2820444	219568478	Mustache	rs2605100	1:219644224	1.345e-14	0.0475909	0.449583
1	219390000 - 219400000	219560000 - 219570000	rs2820444	219568478	Mustache	rs2605100	1:219644224	1.345e-14	0.0475909	0.449583
11	64240000 - 64250000	65550000 - 65560000	rs12270054	65555077	Mustache	rs67924081	11:65342981	3.562e-13	0.0956892	0.98439
11	64240000 - 64250000	65550000 - 65560000	rs10896015	65556254	Mustache	rs67924081	11:65342981	3.504e-13	0.0956892	0.979202
11	65025000 - 65030000	65570000 - 65575000	rs1151496	65570563	Mustache	rs67924081	11:65342981	3.419e-13	0.0804083	1
11	65025000 - 65030000	65570000 - 65575000	rs1194104	65571875	Mustache	rs67924081	11:65342981	3.421e-13	0.0902917	1
11	65025000 - 65030000	65570000 - 65575000	rs1784220	65570243	Mustache	rs67924081	11:65342981	3.53e-13	0.0804083	1
11	65025000 - 65030000	65570000 - 65575000	rs59286748	65570244	Mustache	rs67924081	11:65342981	3.541e-13	0.0804083	1
11	66340000 - 66350000	67410000 - 67420000	rs61734601	67417254	Mustache	rs34560402	11:66872320	1.097e-09	0.0944035	0.73948
11	76735000 - 76740000	76795000 - 76800000	rs1149620	76795528	Mustache	rs1149620	11:76506572	2.865e-09	0.22734	1
12	58550000 - 58560000	58890000 - 58900000	rs17120227	58895568	Mustache	rs17120227	12:59289349	7.206e-13	0.276125	1
12	58550000 - 58560000	58890000 - 58900000	rs11172801	58894199	Mustache	rs17120227	12:59289349	3.787e-12	0.0600745	0.922052
12	58550000 - 58560000	58890000 - 58900000	rs11172805	58896498	Mustache	rs17120227	12:59289349	4.028e-12	0.0471801	0.922052
12	58550000 - 58560000	58890000 - 58900000	rs11172808	58899816	Mustache	rs17120227	12:59289349	5.135e-12	0.0393922	0.922052
12	58550000 - 58560000	58890000 - 58900000	rs79056043	58895817	Mustache	rs17120227	12:59289349	6.095e-12	0.0379118	0.864017
12	93580000 - 93590000	93750000 - 93760000	rs4144499	93758068	Mustache	rs7953280	12:94136009	5.976e-12	0.0492308	0.867345
12	122780000 - 122790000	123240000 - 123250000	rs78788984	123246508	Mustache	rs753350451	12:123732769	3.671e-10	0.0715982	-
12	122780000 - 122790000	123240000 - 123250000	rs753350451	123248222	Mustache	rs753350451	12:123732769	3.359e-10	0.0790533	1
12	122850000 - 122860000	123240000 - 123250000	rs78788984	123246508	Mustache	rs753350451	12:123732769	3.671e-10	0.0715982	-
12	122850000 - 122860000	123240000 - 123250000	rs753350451	123248222	Mustache	rs753350451	12:123732769	3.359e-10	0.0790533	1
12	123020000 - 123030000	123210000 - 123220000	rs1790132	123213972	Mustache	rs753350451	12:123732769	4.49e-10	0.0676543	-
12	123020000 - 123030000	123210000 - 123220000	rs1790133	123213971	Mustache	rs753350451	12:123732769	4.49e-10	0.0676543	-
16	69800000 - 69810000	69920000 - 69930000	rs34195470	69921787	Mustache	rs34195470	16:69955690	3.128e-13	0.445223	1
17	1900000 - 1910000	2260000 - 2270000	rs216175	2264396	Mustache	rs216175	17:2167690	2.737e-12	0.693888	1
17	69455000 - 69460000	69505000 - 69510000	rs2716212	69507512	Mustache	rs2716212	17:67503653	3.56e-10	0.312127	1
17	69455000 - 69460000	69505000 - 69510000	rs2521349	69507360	Mustache	rs2716212	17:67503653	3.637e-10	0.295152	1
19	10410000 - 10415000	10645000 - 10650000	rs1975163	10645723	Mustache	rs10405617	19:10752968	1.15438e-10	0.0568143	1
19	10410000 - 10415000	10645000 - 10650000	rs10408721	10647643	Mustache	rs10405617	19:10752968	1.77905e-10	0.0372387	0.945915
19	10580000 - 10585000	10645000 - 10650000	rs1975163	10645723	Mustache	rs10405617	19:10752968	1.15438e-10	0.0568143	1
19	10580000 - 10585000	10645000 - 10650000	rs10408721	10647643	Mustache	rs10405617	19:10752968	1.77905e-10	0.0372387	0.945915
19	45440000 - 45450000	45880000 - 45890000	rs8112559	45887197	Mustache	rs8112559	19:46390455	7.317e-11	0.308911	1
19	45440000 - 45450000	45880000 - 45890000	rs8112972	45887347	Mustache	rs8112559	19:46390455	1.163e-10	0.200972	0.989288
19	45440000 - 45450000	45880000 - 45890000	rs11550348	45884086	Mustache	rs8112559	19:46390455	9.071e-11	0.279626	1
2	105370000 - 105380000	106070000 - 106080000	rs13014521	106071000	Mustache	rs66989638	2:106689736	3.287e-10	0.108067	0.973046
2	105370000 - 105380000	106070000 - 106080000	rs66989638	106073280	Mustache	rs66989638	2:106689736	3.311e-11	0.891765	1
2	105760000 - 105770000	106070000 - 106080000	rs13014521	106071000	Mustache	rs66989638	2:106689736	3.287e-10	0.108067	0.973046
2	105760000 - 105770000	106070000 - 106080000	rs66989638	106073280	Mustache	rs66989638	2:106689736	3.311e-11	0.891765	1
2	105805000 - 105810000	106070000 - 106075000	rs13014521	106071000	Mustache	rs66989638	2:106689736	3.287e-10	0.108067	0.973046
2	105805000 - 105810000	106070000 - 106075000	rs66989638	106073280	Mustache	rs66989638	2:106689736	3.311e-11	0.891765	1
2	105830000 - 105840000	106070000 - 106080000	rs13014521	106071000	Mustache	rs66989638	2:106689736	3.287e-10	0.108067	0.973046
2	105830000 - 105840000	106070000 - 106080000	rs66989638	106073280	Mustache	rs66989638	2:106689736	3.311e-11	0.891765	1
22	26890000 - 26900000	27810000 - 27820000	rs13057169	27810971	Mustache	rs11705555	22:28206912	1.836e-08	0.0413635	0.944523
22	26890000 - 26900000	27810000 - 27820000	rs11703195	27811642	Mustache	rs11705555	22:28206912	2.962e-09	0.230451	0.994388
22	26890000 - 26900000	27810000 - 27820000	rs11704137	27812540	Mustache	rs11705555	22:28206912	3.694e-09	0.187415	0.994405
22	26890000 - 26900000	27810000 - 27820000	rs11704274	27812741	Mustache	rs11705555	22:28206912	3.132e-09	0.230451	0.994405
22	26890000 - 26900000	27810000 - 27820000	rs11705555	27810924	Mustache	rs11705555	22:28206912	2.993e-09	0.230451	1
22	37630000 - 37640000	37750000 - 37760000	rs4821706	37758683	Mustache	rs12160491	22:38195796	3.329e-10	0.0422089	0.902883
3	10190000 - 10200000	11600000 - 11610000	rs2117870	11600803	Mustache	rs2276749	3:11643465	5.162e-09	0.0499327	0.977704
3	10190000 - 10200000	11600000 - 11610000	rs2276749	11601991	Mustache	rs2276749	3:11643465	3.34e-09	0.0774542	1
3	10190000 - 10200000	11600000 - 11610000	rs6786146	11604241	Mustache	rs2276749	3:11643465	4.103e-09	0.0585811	0.977704
3	10190000 - 10200000	11600000 - 11610000	rs6799718	11600785	Mustache	rs2276749	3:11643465	4.094e-09	0.0627464	-
3	10190000 - 10200000	11600000 - 11610000	rs6810015	11604111	Mustache	rs2276749	3:11643465	4.793e-09	0.0534658	0.977704
3	10190000 - 10200000	11600000 - 11610000	rs12633581	11601220	Mustache	rs2276749	3:11643465	4.128e-09	0.0613251	0.977704
3	11135000 - 11140000	11600000 - 11605000	rs2117870	11600803	Mustache	rs2276749	3:11643465	5.162e-09	0.0499327	0.977704
3	11135000 - 11140000	11600000 - 11605000	rs2276749	11601991	Mustache	rs2276749	3:11643465	3.34e-09	0.0774542	1
3	11135000 - 11140000	11600000 - 11605000	rs6786146	11604241	Mustache	rs2276749	3:11643465	4.103e-09	0.0585811	0.977704
3	11135000 - 11140000	11600000 - 11605000	rs6799718	11600785	Mustache	rs2276749	3:11643465	4.094e-09	0.0627464	-
3	11135000 - 11140000	11600000 - 11605000	rs6810015	11604111	Mustache	rs2276749	3:11643465	4.793e-09	0.0534658	0.977704
3	11135000 - 11140000	11600000 - 11605000	rs12633581	11601220	Mustache	rs2276749	3:11643465	4.128e-09	0.0613251	0.977704
3	11380000 - 11385000	11600000 - 11605000	rs2117870	11600803	Mustache	rs2276749	3:11643465	5.162e-09	0.0499327	0.977704
3	11380000 - 11385000	11600000 - 11605000	rs2276749	11601991	Mustache	rs2276749	3:11643465	3.34e-09	0.0774542	1
3	11380000 - 11385000	11600000 - 11605000	rs6786146	11604241	Mustache	rs2276749	3:11643465	4.103e-09	0.0585811	0.977704
3	11380000 - 11385000	11600000 - 11605000	rs6799718	11600785	Mustache	rs2276749	3:11643465	4.094e-09	0.0627464	-
3	11380000 - 11385000	11600000 - 11605000	rs6810015	11604111	Mustache	rs2276749	3:11643465	4.793e-09	0.0534658	0.977704
3	11380000 - 11385000	11600000 - 11605000	rs12633581	11601220	Mustache	rs2276749	3:11643465	4.128e-09	0.0613251	0.977704
3	11515000 - 11520000	11600000 - 11605000	rs2117870	11600803	Mustache	rs2276749	3:11643465	5.162e-09	0.0499327	0.977704
3	11515000 - 11520000	11600000 - 11605000	rs2276749	11601991	Mustache	rs2276749	3:11643465	3.34e-09	0.0774542	1
3	11515000 - 11520000	11600000 - 11605000	rs6786146	11604241	Mustache	rs2276749	3:11643465	4.103e-09	0.0585811	0.977704
3	11515000 - 11520000	11600000 - 11605000	rs6799718	11600785	Mustache	rs2276749	3:11643465	4.094e-09	0.0627464	-
3	11515000 - 11520000	11600000 - 11605000	rs6810015	11604111	Mustache	rs2276749	3:11643465	4.793e-09	0.0534658	0.977704
3	11515000 - 11520000	11600000 - 11605000	rs12633581	11601220	Mustache	rs2276749	3:11643465	4.128e-09	0.0613251	0.977704
3	188350000 - 188355000	188575000 - 188580000	rs758236099	188579521	Mustache	rs747952496	3:188311659	6.88415e-10	0.0608397	-
4	1205000 - 1210000	1715000 - 1720000	rs2236786	1717567	Mustache	rs1530586	4:1760927	1.801e-13	0.0303651	0.918641
4	1245000 - 1250000	1715000 - 1720000	rs2236786	1717567	Mustache	rs1530586	4:1760927	1.801e-13	0.0303651	0.918641
4	100410000 - 100420000	102260000 - 102270000	rs13107325	102267552	Mustache	rs13107325	4:103188709	3.248e-17	0.963611	1
4	101360000 - 101370000	102260000 - 102270000	rs13107325	102267552	Mustache	rs13107325	4:103188709	3.248e-17	0.963611	1
4	144010000 - 144020000	145060000 - 145070000	rs79953717	145065593	Mustache	rs75686861	4:145621328	7.674e-08	0.0352585	0.00214199
4	144170000 - 144180000	145060000 - 145070000	rs79953717	145065593	Mustache	rs75686861	4:145621328	7.674e-08	0.0352585	0.00214199
4	144360000 - 144370000	144700000 - 144710000	rs75686861	144700176	Mustache	rs75686861	4:145621328	3.039e-09	0.600413	1
4	144360000 - 144370000	145060000 - 145070000	rs79953717	145065593	Mustache	rs75686861	4:145621328	7.674e-08	0.0352585	0.00214199
4	144445000 - 144450000	144700000 - 144705000	rs75686861	144700176	Mustache	rs75686861	4:145621328	3.039e-09	0.600413	1
4	145110000 - 145115000	145165000 - 145170000	rs116125427	145166827	Mustache	rs75686861	4:145621328	2.262e-08	0.0891224	0.467419
5	67300000 - 67305000	68525000 - 68530000	rs11750646	68529768	Mustache	rs56132153	5:67825133	7.597e-09	0.0583678	0.891576
5	67300000 - 67305000	68525000 - 68530000	rs10940168	68527759	Mustache	rs56132153	5:67825133	5.163e-09	0.0781968	1
5	67300000 - 67305000	68525000 - 68530000	rs10940169	68527855	Mustache	rs56132153	5:67825133	1.188e-08	0.0388658	0.899294
5	67300000 - 67305000	68525000 - 68530000	rs10471339	68527946	Mustache	rs56132153	5:67825133	9.498e-09	0.0475991	0.895429
5	67300000 - 67305000	68525000 - 68530000	rs6897355	68527789	Mustache	rs56132153	5:67825133	5.117e-09	0.0781968	1
5	67300000 - 67305000	68525000 - 68530000	rs7711053	68526793	Mustache	rs56132153	5:67825133	8.832e-09	0.0500832	0.895429
5	67300000 - 67305000	68525000 - 68530000	rs56132153	68529306	Mustache	rs56132153	5:67825133	3.799e-09	0.107023	1
5	68290000 - 68300000	68530000 - 68540000	rs1423232	68533051	Mustache	rs56132153	5:67825133	6.716e-09	0.05442	0.971179
5	68290000 - 68300000	68530000 - 68540000	rs2078396	68538416	Mustache	rs56132153	5:67825133	4.755e-09	0.0728518	0.870243
5	68290000 - 68300000	68530000 - 68540000	rs7704228	68530907	Mustache	rs56132153	5:67825133	9.727e-09	0.0475991	0.891576
5	68290000 - 68300000	68530000 - 68540000	rs34485661	68532398	Mustache	rs56132153	5:67825133	9.88e-09	0.0380206	0.983312
5	68290000 - 68300000	68530000 - 68540000	rs28562175	68531629	Mustache	rs56132153	5:67825133	8.81e-09	0.0397168	0.891576
5	68450000 - 68460000	68530000 - 68540000	rs1423232	68533051	Mustache	rs56132153	5:67825133	6.716e-09	0.05442	0.971179
5	68450000 - 68460000	68530000 - 68540000	rs2078396	68538416	Mustache	rs56132153	5:67825133	4.755e-09	0.0728518	0.870243
5	68450000 - 68460000	68530000 - 68540000	rs7704228	68530907	Mustache	rs56132153	5:67825133	9.727e-09	0.0475991	0.891576
5	68450000 - 68460000	68530000 - 68540000	rs34485661	68532398	Mustache	rs56132153	5:67825133	9.88e-09	0.0380206	0.983312
5	68450000 - 68460000	68530000 - 68540000	rs28562175	68531629	Mustache	rs56132153	5:67825133	8.81e-09	0.0397168	0.891576
5	127750000 - 127760000	128510000 - 128520000	rs17677555	128516919	Mustache	rs17615906	5:128018413	9.961e-11	0.0587191	0.465704
5	128210000 - 128215000	128675000 - 128680000	rs17677724	128679677	Mustache	rs17615906	5:128018413	5.869e-11	0.0995121	0.837618
6	18260000 - 18270000	18390000 - 18400000	rs1886248	18399163	Mustache	rs9396861	6:18404133	1.978e-10	0.299687	0.618163
6	32890000 - 32900000	33080000 - 33090000	rs3130169	33080325	Mustache	rs2856821	6:33046742	2.337e-08	0.0347915	0.427617
6	32890000 - 32900000	33080000 - 33090000	rs9277369	33082367	Mustache	rs2856821	6:33046742	2.146e-08	0.0374901	0.683399
6	32890000 - 32900000	33080000 - 33090000	rs9277552	33087724	Mustache	rs2856821	6:33046742	7.141e-09	0.0946852	0.906933
6	32890000 - 32900000	33080000 - 33090000	rs1042136	33080851	Mustache	rs2856821	6:33046742	1.462e-08	0.0488581	0.715496
6	75280000 - 75290000	75450000 - 75460000	rs12209223	75454873	Mustache	rs12209223	6:76164589	1.921e-29	0.853174	1
7	101600000 - 101610000	102230000 - 102240000	rs113484852	102231061	Mustache	rs116934101	7:101775597	1.469e-08	0.0487563	0.822896
7	101820000 - 101830000	102230000 - 102240000	rs113484852	102231061	Mustache	rs116934101	7:101775597	1.469e-08	0.0487563	0.822896
9	3520000 - 3530000	4290000 - 4300000	rs10974438	4291928	Mustache	rs10974438	9:4291928	7.39e-11	0.728404	1
9	3520000 - 3530000	4290000 - 4300000	rs10814915	4290544	Mustache	rs10974438	9:4291928	8.129e-10	0.0556886	0.648054
9	3520000 - 3530000	4290000 - 4300000	rs12350099	4298576	Mustache	rs10974438	9:4291928	2.075e-09	0.0346145	0.104184
9	3520000 - 3530000	4290000 - 4300000	rs10758594	4295583	Mustache	rs10974438	9:4291928	1.108e-09	0.0457541	0.639226
9	3870000 - 3880000	4290000 - 4300000	rs10974438	4291928	Mustache	rs10974438	9:4291928	7.39e-11	0.728404	1
9	3870000 - 3880000	4290000 - 4300000	rs10814915	4290544	Mustache	rs10974438	9:4291928	8.129e-10	0.0556886	0.648054
9	3870000 - 3880000	4290000 - 4300000	rs12350099	4298576	Mustache	rs10974438	9:4291928	2.075e-09	0.0346145	0.104184
9	3870000 - 3880000	4290000 - 4300000	rs10758594	4295583	Mustache	rs10974438	9:4291928	1.108e-09	0.0457541	0.639226
9	4035000 - 4040000	4290000 - 4295000	rs10974438	4291928	Mustache	rs10974438	9:4291928	7.39e-11	0.728404	1
9	4035000 - 4040000	4290000 - 4295000	rs10814915	4290544	Mustache	rs10974438	9:4291928	8.129e-10	0.0556886	0.648054
9	4130000 - 4140000	4290000 - 4300000	rs10974438	4291928	Mustache	rs10974438	9:4291928	7.39e-11	0.728404	1
9	4130000 - 4140000	4290000 - 4300000	rs10814915	4290544	Mustache	rs10974438	9:4291928	8.129e-10	0.0556886	0.648054
9	4130000 - 4140000	4290000 - 4300000	rs12350099	4298576	Mustache	rs10974438	9:4291928	2.075e-09	0.0346145	0.104184
9	4130000 - 4140000	4290000 - 4300000	rs10758594	4295583	Mustache	rs10974438	9:4291928	1.108e-09	0.0457541	0.639226
9	4230000 - 4235000	4290000 - 4295000	rs10974438	4291928	Mustache	rs10974438	9:4291928	7.39e-11	0.728404	1
9	4230000 - 4235000	4290000 - 4295000	rs10814915	4290544	Mustache	rs10974438	9:4291928	8.129e-10	0.0556886	0.648054
9	114110000 - 114115000	114150000 - 114155000	rs72760655	114153934	Mustache	rs72760655	9:116916214	1.15816e-12	0.309825	1
9	114660000 - 114665000	115580000 - 115585000	rs1400900375	115580746	Mustache	rs1400900375	9:118343026	4.39537e-11	0.318598	1
9	114660000 - 114665000	115580000 - 115585000	rs11451416	115580868	Mustache	rs1400900375	9:118343026	2.25006e-10	0.0710285	-
9	114660000 - 114665000	115580000 - 115585000	rs10739455	115580751	Mustache	rs1400900375	9:118343026	5.76817e-11	0.244387	-
9	114670000 - 114680000	115520000 - 115530000	rs4979549	115528818	Mustache	rs1400900375	9:118343026	2.52416e-10	0.0635002	-
9	114670000 - 114680000	115520000 - 115530000	rs6478182	115527482	Mustache	rs1400900375	9:118343026	2.27721e-10	0.0701964	-
9	114735000 - 114740000	115525000 - 115530000	rs4979549	115528818	Mustache	rs1400900375	9:118343026	2.52416e-10	0.0635002	-
9	114735000 - 114740000	115525000 - 115530000	rs6478182	115527482	Mustache	rs1400900375	9:118343026	2.27721e-10	0.0701964	-
9	115020000 - 115030000	115520000 - 115530000	rs4979549	115528818	Mustache	rs1400900375	9:118343026	2.52416e-10	0.0635002	-
9	115020000 - 115030000	115520000 - 115530000	rs6478182	115527482	Mustache	rs1400900375	9:118343026	2.27721e-10	0.0701964	-
9	115100000 - 115110000	115520000 - 115530000	rs4979549	115528818	Mustache	rs1400900375	9:118343026	2.52416e-10	0.0635002	-
9	115100000 - 115110000	115520000 - 115530000	rs6478182	115527482	Mustache	rs1400900375	9:118343026	2.27721e-10	0.0701964	-
9	115590000 - 115600000	116570000 - 116580000	rs11787627	116578758	Mustache	rs1321917	9:119324929	5.76407e-18	0.0664105	0.940583
9	115590000 - 115600000	116570000 - 116580000	rs10759850	116576204	Mustache	rs1321917	9:119324929	5.82384e-18	0.0657441	0.940583
9	115700000 - 115710000	116560000 - 116570000	rs1321917	116562650	Mustache	rs1321917	9:119324929	2.45628e-18	0.153842	1
9	115700000 - 115710000	116560000 - 116570000	rs10759849	116565910	Mustache	rs1321917	9:119324929	5.55357e-18	0.0688933	0.940583
9	116150000 - 116160000	116560000 - 116570000	rs1321917	116562650	Mustache	rs1321917	9:119324929	2.45628e-18	0.153842	1
9	116150000 - 116160000	116560000 - 116570000	rs10759849	116565910	Mustache	rs1321917	9:119324929	5.55357e-18	0.0688933	0.940583
9	116270000 - 116280000	116560000 - 116570000	rs1321917	116562650	Mustache	rs1321917	9:119324929	2.45628e-18	0.153842	1
9	116270000 - 116280000	116560000 - 116570000	rs10759849	116565910	Mustache	rs1321917	9:119324929	5.55357e-18	0.0688933	0.940583
9	116370000 - 116380000	116550000 - 116560000	rs1407243	116552572	Mustache	rs1321917	9:119324929	3.14866e-18	0.12046	1
9	116370000 - 116380000	116550000 - 116560000	rs1895062	116551207	Mustache	rs1321917	9:119324929	1.76179e-18	0.213395	0.9919
9	116480000 - 116490000	116560000 - 116570000	rs1321917	116562650	Mustache	rs1321917	9:119324929	2.45628e-18	0.153842	1
9	116480000 - 116490000	116560000 - 116570000	rs10759849	116565910	Mustache	rs1321917	9:119324929	5.55357e-18	0.0688933	0.940583
9	126940000 - 126945000	127155000 - 127160000	rs10465114	127155545	Mustache	rs10465114	9:129917824	1.00206e-08	0.0667576	1
9	126950000 - 126960000	127110000 - 127120000	rs10819267	127110445	Mustache	rs10465114	9:129917824	1.38608e-08	0.0483538	0.965336
9	126950000 - 126960000	127110000 - 127120000	rs10760476	127112976	Mustache	rs10465114	9:129917824	1.55042e-08	0.0433798	0.965336
