# Supplementary material for: Primary osteoarthritis chondrocyte map of chromatin conformation reveals novel candidate effector genes
Source: Ann Rheum Dis. 2024 Mar 13;83(8):1048–59. doi: 10.1136/ard-2023-224945 (PMC11287644; doi:10.1136/ard-2023-224945)
Supplement: Supplementary data [file ard-2023-224945supp020.xlsx]

## Sheet: SNP_in_active_Enhancer
Supplemental Table 9: All loops with credible set variants from the 95% credible sets from Boer, Hatzikotoulas, Southam et al. (PMID : 34450027; GO1) in an active enhancer region annotated from ENCODE SCREEN (V3, PMID 32728249) in the Hi-C loop data identified by overlaying with ATAC-Seq (PMID 30341348) and ChiP-Seq peaks (PMID 30194383) (H3K4me1, H3K27ac). Active promoters in contact loops were …
Chromosome	Loop anchor 1 position	Loop anchor 2 position	Credible set variant rsid	Credible set variant position	Source	Enhancer_start	Enhancer_end	Enhancer_ID	Promoter_start	Promoter_end	Promoter_ID	Gene name	Loop Type	Lead rsid
19	10562751 - 10607249	10622751 - 10667249	rs10948	10644229	FanC	10644084	10644245	EH38E3289688	10565900	10566250	EH38E3289611	CDKN2D	Enhancer - Promoter	rs10405617
19	10562751 - 10607249	10622751 - 10667249	rs10948	10644229	FanC	10644084	10644245	EH38E3289688	10568887	10569236	EH38E3289616	CDKN2D	Enhancer - Promoter	rs10405617
19	10554330 - 10600670	10624330 - 10670670	rs10948	10644229	FanC	10644084	10644245	EH38E3289688	10565900	10566250	EH38E3289611	CDKN2D	Enhancer - Promoter	rs10405617
19	10554330 - 10600670	10624330 - 10670670	rs10948	10644229	FanC	10644084	10644245	EH38E3289688	10568887	10569236	EH38E3289616	CDKN2D	Enhancer - Promoter	rs10405617
19	10562751 - 10607249	10622751 - 10667249	rs10948	10644229	FanC	10644084	10644245	EH38E3289688	10565900	10566250	EH38E3289611	KRI1	Enhancer - Promoter	rs10405617
19	10554330 - 10600670	10624330 - 10670670	rs10948	10644229	FanC	10644084	10644245	EH38E3289688	10565900	10566250	EH38E3289611	KRI1	Enhancer - Promoter	rs10405617
19	10570000 - 10580000	10640000 - 10650000	rs10948	10644229	HiCExplorer	10644084	10644245	EH38E3289688	NA	NA	NA	NA	Enhancer - Enhancer	rs10405617
19	10562751 - 10607249	10622751 - 10667249	rs10948	10644229	FanC	10644084	10644245	EH38E3289688	10602237	10602587	EH38E3289644	SLC44A2	Enhancer-Promoter	rs143083812
7	129198820 - 129231180	129458820 - 129491180	rs143083812	129203569	FanC	129203312	129203646	EH38E3799263	NA	NA	NA	NA	Enhancer - Enhancer	rs143083812
7	129152547 - 129177453	129202547 - 129227453	rs143083812	129203569	FanC	129203312	129203646	EH38E3799263	NA	NA	NA	NA	Enhancer - Enhancer	rs143083812
7	129144486 - 129180514	129194486 - 129230514	rs143083812	129203569	FanC	129203312	129203646	EH38E3799263	129144584	129144931	EH38E3799230	TSPAN33	Enhancer-Promoter	rs12908498
15	67070001 - 67080000	67250001 - 67260000	rs1498506	67075296	FanC	67075215	67075534	EH38E3141496	67254571	67254921	EH38E1772301	AAGAB	Enhancer - Promoter	rs12908498
15	67070001 - 67080000	67250001 - 67260000	rs1498506	67075296	FanC	67075215	67075534	EH38E3141496	67255015	67255173	EH38E3141710	AAGAB	Enhancer - Promoter	rs12908498
15	67070001 - 67080000	67250001 - 67260000	rs1498506	67075296	FanC	67075215	67075534	EH38E3141496	67255188	67255359	EH38E3141711	AAGAB	Enhancer - Promoter	rs12908498
15	67070001 - 67080000	67250001 - 67260000	rs1498506	67075296	FanC	67075215	67075534	EH38E3141496	67254571	67254921	EH38E1772301	IQCH	Enhancer - Promoter	rs12908498
15	67070001 - 67080000	67250001 - 67260000	rs1498506	67075296	FanC	67075215	67075534	EH38E3141496	67255015	67255173	EH38E3141710	IQCH	Enhancer - Promoter	rs12908498
15	67070001 - 67080000	67250001 - 67260000	rs1498506	67075296	FanC	67075215	67075534	EH38E3141496	67255188	67255359	EH38E3141711	IQCH	Enhancer - Promoter	rs12908498
15	67044189 - 67085811	67104189 - 67145811	rs1498506	67075296	FanC	67075215	67075534	EH38E3141496	NA	NA	NA	NA	Enhancer - Enhancer	rs12908498
15	67067663 - 67077662	67827663 - 67837662	rs1498506	67075296	SIP	67075215	67075534	EH38E3141496	NA	NA	NA	NA	Enhancer - Enhancer	rs12908498
15	67049080 - 67085920	67089080 - 67125920	rs1498506	67075296	FanC	67075215	67075534	EH38E3141496	67098332	67098682	EH38E3141530	SMAD3	Enhancer-Promoter	rs12908498
15	67070001 - 67080000	67250001 - 67260000	rs1498507	67075368	FanC	67075215	67075534	EH38E3141496	67254571	67254921	EH38E1772301	AAGAB	Enhancer - Promoter	rs12908498
15	67070001 - 67080000	67250001 - 67260000	rs1498507	67075368	FanC	67075215	67075534	EH38E3141496	67255015	67255173	EH38E3141710	AAGAB	Enhancer - Promoter	rs12908498
15	67070001 - 67080000	67250001 - 67260000	rs1498507	67075368	FanC	67075215	67075534	EH38E3141496	67255188	67255359	EH38E3141711	AAGAB	Enhancer - Promoter	rs12908498
15	67070001 - 67080000	67250001 - 67260000	rs1498507	67075368	FanC	67075215	67075534	EH38E3141496	67254571	67254921	EH38E1772301	IQCH	Enhancer - Promoter	rs12908498
15	67070001 - 67080000	67250001 - 67260000	rs1498507	67075368	FanC	67075215	67075534	EH38E3141496	67255015	67255173	EH38E3141710	IQCH	Enhancer - Promoter	rs12908498
15	67070001 - 67080000	67250001 - 67260000	rs1498507	67075368	FanC	67075215	67075534	EH38E3141496	67255188	67255359	EH38E3141711	IQCH	Enhancer - Promoter	rs12908498
15	67044189 - 67085811	67104189 - 67145811	rs1498507	67075368	FanC	67075215	67075534	EH38E3141496	NA	NA	NA	NA	Enhancer - Enhancer	rs12908498
15	67067663 - 67077662	67827663 - 67837662	rs1498507	67075368	SIP	67075215	67075534	EH38E3141496	NA	NA	NA	NA	Enhancer - Enhancer	rs12908498
15	67049080 - 67085920	67089080 - 67125920	rs1498507	67075368	FanC	67075215	67075534	EH38E3141496	67098332	67098682	EH38E3141530	SMAD3	Enhancer-Promoter	rs12908498
9	116373313 - 116411687	116543313 - 116581687	rs1895062	116551207	FanC	116551116	116551318	EH38E2721708	NA	NA	NA	NA	Enhancer - Enhancer	rs1321917
9	116370000 - 116380000	116550000 - 116560000	rs1895062	116551207	Mustache	116551116	116551318	EH38E2721708	NA	NA	NA	NA	Enhancer - Enhancer	rs1321917
9	116367722 - 116377721	116547722 - 116557721	rs1895062	116551207	SIP	116551116	116551318	EH38E2721708	NA	NA	NA	NA	Enhancer - Enhancer	rs1321917
9	116137253 - 116172747	116537253 - 116572747	rs1895062	116551207	FanC	116551116	116551318	EH38E2721708	116153427	116153772	EH38E3904112	PAPPA	Enhancer-Promoter	rs1321917
9	116137253 - 116172747	116537253 - 116572747	rs1895062	116551207	FanC	116551116	116551318	EH38E2721708	116153809	116154116	EH38E3904113	PAPPA	Enhancer-Promoter	rs1321917
9	116150000 - 116160000	116550000 - 116560000	rs1895062	116551207	HiCExplorer	116551116	116551318	EH38E2721708	116153427	116153772	EH38E3904112	PAPPA	Enhancer-Promoter	rs1321917
9	116150000 - 116160000	116550000 - 116560000	rs1895062	116551207	HiCExplorer	116551116	116551318	EH38E2721708	116153809	116154116	EH38E3904113	PAPPA	Enhancer-Promoter	rs1321917
3	11135000 - 11140000	11600000 - 11605000	rs2276749	11601991	Mustache	11601821	11602167	EH38E3495715	11136875	11137222	EH38E2178211	HRH1	Enhancer - Promoter	rs2276749
3	11128315 - 11138314	11598527 - 11608526	rs2276749	11601991	SIP	11601821	11602167	EH38E3495715	11136875	11137222	EH38E2178211	HRH1	Enhancer - Promoter	rs2276749
3	11482798 - 11547202	11562798 - 11627202	rs2276749	11601991	FanC	11601821	11602167	EH38E3495715	NA	NA	NA	NA	Enhancer - Enhancer	rs2276749
3	10200000 - 10210000	11600000 - 11610000	rs2276749	11601991	HiCExplorer	11601821	11602167	EH38E3495715	NA	NA	NA	NA	Enhancer - Enhancer	rs2276749
3	11510000 - 11515000	11600000 - 11605000	rs2276749	11601991	HiCExplorer	11601821	11602167	EH38E3495715	NA	NA	NA	NA	Enhancer - Enhancer	rs2276749
3	10190000 - 10200000	11600000 - 11610000	rs2276749	11601991	Mustache	11601821	11602167	EH38E3495715	NA	NA	NA	NA	Enhancer - Enhancer	rs2276749
3	11380000 - 11385000	11600000 - 11605000	rs2276749	11601991	Mustache	11601821	11602167	EH38E3495715	NA	NA	NA	NA	Enhancer - Enhancer	rs2276749
3	11515000 - 11520000	11600000 - 11605000	rs2276749	11601991	Mustache	11601821	11602167	EH38E3495715	NA	NA	NA	NA	Enhancer - Enhancer	rs2276749
3	11378527 - 11388526	11598527 - 11603526	rs2276749	11601991	SIP	11601821	11602167	EH38E3495715	NA	NA	NA	NA	Enhancer - Enhancer	rs2276749
3	11600000 - 11605000	11640000 - 11645000	rs2276749	11601991	Mustache	11601821	11602167	EH38E3495715	11643608	11643828	EH38E2178686	VGLL4	Enhancer-Promoter	rs2276749
3	11600000 - 11605000	11640000 - 11645000	rs2276749	11601991	Mustache	11601821	11602167	EH38E3495715	11643830	11644170	EH38E2178687	VGLL4	Enhancer-Promoter	rs2276749
5	142420001 - 142430000	142550001 - 142560000	rs28538668	142425735	FanC	142425681	142426019	EH38E2415642	NA	NA	NA	NA	Enhancer - Enhancer	rs10062749
5	142245001 - 142265000	142415001 - 142435000	rs28538668	142425735	FanC	142425681	142426019	EH38E2415642	NA	NA	NA	NA	Enhancer - Enhancer	rs10062749
5	142245000 - 142250000	142425000 - 142430000	rs28538668	142425735	HiCExplorer	142425681	142426019	EH38E2415642	NA	NA	NA	NA	Enhancer - Enhancer	rs10062749
5	142425000 - 142430000	142545000 - 142550000	rs28538668	142425735	Mustache	142425681	142426019	EH38E2415642	NA	NA	NA	NA	Enhancer - Enhancer	rs10062749
5	142425436 - 142430435	142690436 - 142695435	rs28538668	142425735	SIP	142425681	142426019	EH38E2415642	NA	NA	NA	NA	Enhancer - Enhancer	rs10062749
5	141980436 - 141990435	142420436 - 142430435	rs28538668	142425735	SIP	142425681	142426019	EH38E2415642	NA	NA	NA	NA	Enhancer - Enhancer	rs10062749
5	142245436 - 142250435	142425436 - 142430435	rs28538668	142425735	SIP	142425681	142426019	EH38E2415642	NA	NA	NA	NA	Enhancer - Enhancer	rs10062749
5	142312929 - 142337071	142412929 - 142437071	rs28538668	142425735	FanC	142425681	142426019	EH38E2415642	142324931	142325281	EH38E2415548	SPRY4	Enhancer-Promoter	rs10062749
5	142312929 - 142337071	142412929 - 142437071	rs28538668	142425735	FanC	142425681	142426019	EH38E2415642	142325305	142325507	EH38E3666720	SPRY4	Enhancer-Promoter	rs10062749
5	142312929 - 142337071	142412929 - 142437071	rs28538668	142425735	FanC	142425681	142426019	EH38E2415642	142324931	142325281	EH38E2415548	SPRY4-AS1	Enhancer-Promoter	rs10062749
5	142312929 - 142337071	142412929 - 142437071	rs28538668	142425735	FanC	142425681	142426019	EH38E2415642	142325305	142325507	EH38E3666720	SPRY4-AS1	Enhancer-Promoter	rs2276749
3	11135000 - 11140000	11600000 - 11605000	rs6799718	11600785	Mustache	11600446	11600796	EH38E2178618	11136875	11137222	EH38E2178211	HRH1	Enhancer - Promoter	rs2276749
3	11128315 - 11138314	11598527 - 11608526	rs6799718	11600785	SIP	11600446	11600796	EH38E2178618	11136875	11137222	EH38E2178211	HRH1	Enhancer - Promoter	rs2276749
3	11482798 - 11547202	11562798 - 11627202	rs6799718	11600785	FanC	11600446	11600796	EH38E2178618	NA	NA	NA	NA	Enhancer - Enhancer	rs2276749
3	10200000 - 10210000	11600000 - 11610000	rs6799718	11600785	HiCExplorer	11600446	11600796	EH38E2178618	NA	NA	NA	NA	Enhancer - Enhancer	rs2276749
3	11510000 - 11515000	11600000 - 11605000	rs6799718	11600785	HiCExplorer	11600446	11600796	EH38E2178618	NA	NA	NA	NA	Enhancer - Enhancer	rs2276749
3	10190000 - 10200000	11600000 - 11610000	rs6799718	11600785	Mustache	11600446	11600796	EH38E2178618	NA	NA	NA	NA	Enhancer - Enhancer	rs2276749
3	11380000 - 11385000	11600000 - 11605000	rs6799718	11600785	Mustache	11600446	11600796	EH38E2178618	NA	NA	NA	NA	Enhancer - Enhancer	rs2276749
3	11515000 - 11520000	11600000 - 11605000	rs6799718	11600785	Mustache	11600446	11600796	EH38E2178618	NA	NA	NA	NA	Enhancer - Enhancer	rs2276749
3	11378527 - 11388526	11598527 - 11603526	rs6799718	11600785	SIP	11600446	11600796	EH38E2178618	NA	NA	NA	NA	Enhancer - Enhancer	rs2276749
3	11600000 - 11605000	11640000 - 11645000	rs6799718	11600785	Mustache	11600446	11600796	EH38E2178618	11643608	11643828	EH38E2178686	VGLL4	Enhancer-Promoter	rs2276749
3	11600000 - 11605000	11640000 - 11645000	rs6799718	11600785	Mustache	11600446	11600796	EH38E2178618	11643830	11644170	EH38E2178687	VGLL4	Enhancer-Promoter	rs2276749
5	142420001 - 142430000	142550001 - 142560000	rs6861056	142425850	FanC	142425681	142426019	EH38E2415642	NA	NA	NA	NA	Enhancer - Enhancer	rs10062749
5	142245001 - 142265000	142415001 - 142435000	rs6861056	142425850	FanC	142425681	142426019	EH38E2415642	NA	NA	NA	NA	Enhancer - Enhancer	rs10062749
5	142245000 - 142250000	142425000 - 142430000	rs6861056	142425850	HiCExplorer	142425681	142426019	EH38E2415642	NA	NA	NA	NA	Enhancer - Enhancer	rs10062749
5	142425000 - 142430000	142545000 - 142550000	rs6861056	142425850	Mustache	142425681	142426019	EH38E2415642	NA	NA	NA	NA	Enhancer - Enhancer	rs10062749
5	142425436 - 142430435	142690436 - 142695435	rs6861056	142425850	SIP	142425681	142426019	EH38E2415642	NA	NA	NA	NA	Enhancer - Enhancer	rs10062749
5	141980436 - 141990435	142420436 - 142430435	rs6861056	142425850	SIP	142425681	142426019	EH38E2415642	NA	NA	NA	NA	Enhancer - Enhancer	rs10062749
5	142245436 - 142250435	142425436 - 142430435	rs6861056	142425850	SIP	142425681	142426019	EH38E2415642	NA	NA	NA	NA	Enhancer - Enhancer	rs10062749
5	142312929 - 142337071	142412929 - 142437071	rs6861056	142425850	FanC	142425681	142426019	EH38E2415642	142324931	142325281	EH38E2415548	SPRY4	Enhancer-Promoter	rs10062749
5	142312929 - 142337071	142412929 - 142437071	rs6861056	142425850	FanC	142425681	142426019	EH38E2415642	142325305	142325507	EH38E3666720	SPRY4	Enhancer-Promoter	rs10062749
5	142312929 - 142337071	142412929 - 142437071	rs6861056	142425850	FanC	142425681	142426019	EH38E2415642	142324931	142325281	EH38E2415548	SPRY4-AS1	Enhancer-Promoter	rs10062749
5	142312929 - 142337071	142412929 - 142437071	rs6861056	142425850	FanC	142425681	142426019	EH38E2415642	142325305	142325507	EH38E3666720	SPRY4-AS1	Enhancer-Promoter	rs10062749
19	45873913 - 45936087	45963913 - 46026087	rs8112559	45887197	FanC	45887091	45887270	EH38E3310153	45995112	45995462	EH38E3310222	CCDC61	Enhancer - Promoter	rs8112559
19	45871496 - 45933504	45966496 - 46028504	rs8112559	45887197	FanC	45887091	45887270	EH38E3310153	45995112	45995462	EH38E3310222	CCDC61	Enhancer - Promoter	rs8112559
19	45880000 - 45890000	47250000 - 47260000	rs8112559	45887197	Mustache	45887091	45887270	EH38E3310153	47256454	47256712	EH38E3311298	CCDC9	Enhancer - Promoter	rs8112559
19	45860000 - 45865000	45885000 - 45890000	rs8112559	45887197	HiCExplorer	45887091	45887270	EH38E3310153	45864101	45864446	EH38E3310113	FOXA3	Enhancer - Promoter	rs8112559
19	45880000 - 45890000	46010000 - 46020000	rs8112559	45887197	HiCExplorer	45887091	45887270	EH38E3310153	NA	NA	NA	NA	Enhancer - Enhancer	rs8112559
19	45880000 - 45890000	47250000 - 47260000	rs8112559	45887197	Mustache	45887091	45887270	EH38E3310153	47256454	47256712	EH38E3311298	novel transcript	Enhancer-Promoter	rs8112559
19	45880000 - 45890000	46000000 - 46010000	rs8112559	45887197	Mustache	45887091	45887270	EH38E3310153	NA	NA	NA	NA	Enhancer - Enhancer	rs8112559
19	45440000 - 45450000	45880000 - 45890000	rs8112559	45887197	Mustache	45887091	45887270	EH38E3310153	NA	NA	NA	NA	Enhancer - Enhancer	rs8112559
19	45860000 - 45865000	45885000 - 45890000	rs8112559	45887197	HiCExplorer	45887091	45887270	EH38E3310153	45863084	45863434	EH38E3310111	SYMPK	Enhancer-Promoter	rs8112559
19	45860000 - 45865000	45885000 - 45890000	rs8112559	45887197	HiCExplorer	45887091	45887270	EH38E3310153	45864101	45864446	EH38E3310113	SYMPK	Enhancer-Promoter	rs8112559
16	53766089 - 53776088	54281089 - 54286088	rs9939973	53766656	SIP	53766523	53766870	EH38E3181207	NA	NA	NA	NA	Enhancer - Enhancer	rs9940278
16	53766089 - 53776088	54281089 - 54286088	rs9940128	53766842	SIP	53766523	53766870	EH38E3181207	NA	NA	NA	NA	Enhancer - Enhancer	rs9940278
16	53766089 - 53776088	54281089 - 54286088	rs9940646	53766717	SIP	53766523	53766870	EH38E3181207	NA	NA	NA	NA	Enhancer - Enhancer	rs9940278
