# Supplementary material for: Primary osteoarthritis chondrocyte map of chromatin conformation reveals novel candidate effector genes
Source: Ann Rheum Dis. 2024 Mar 13;83(8):1048–59. doi: 10.1136/ard-2023-224945 (PMC11287644; doi:10.1136/ard-2023-224945)
Supplement: Supplementary data [file ard-2023-224945supp022.xlsx]

## Sheet: Sheet1
Supplemental Table 11: Colocalization results. Abreviations are: lg, low-grade cartilage; hg, high-grade cartilage; PP, posterior probability; H0, PP that neither trait has a genetic association in the region; H1, PP that only trait 1 has a genetic association in the region; H2 PP that only trait 2 has a genetic association in the region; H3 PP that both traits are associated, but with different …
Lead GWAS rsid	GWAS phenotype	molecular QTL probe or gene	molecular QTL data	Molecular QTL tissue	H0	H1	H2	H3	H4
rs12908498	Hip osteoarthritis	cg09501821	methQTL	lg	0	0	0	0.019736	0.980264
rs12908498	Hip osteoarthritis	cg09501821	methQTL	hg	0	0	0	0.062777	0.937223
rs10405617	Osteoarthritis at any site	cg01654627	methQTL	lg	0	0.000108	1e-06	0.999866	2.5e-05
rs10405617	Osteoarthritis at any site	cg17710535	methQTL	hg	0	6e-06	0.001926	0.056686	0.941381
rs10062749	Hand osteoarthritis	cg19514721	methQTL	lg	2.6e-05	0.000117	0.005676	0.024668	0.969514
rs1321917	Total hip replacement	cg08189448	methQTL	lg	0	0	0	0.098794	0.901206
rs12908498	Hip osteoarthritis	SMAD3	eQTL	lg	0	0	9.2e-05	0.024911	0.974997
rs12908498	Hip osteoarthritis	SMAD3	eQTL	hg	0	0	1.8e-05	0.0694	0.930583
rs10405617	Osteoarthritis at any site	SLC44A2	eQTL	lg	0	3e-06	0	0.026303	0.973694
rs10405617	Osteoarthritis at any site	SLC44A2	eQTL	hg	0	5e-06	0	0.042022	0.957973
